# Supplementary material for: Parents’ perspectives on the value of assistance dogs for children with autism spectrum disorder: a cross-sectional study
Source: PubMed Central journal article supplement — BMJ Open. 2014 Jun 13;4(6):e004786. doi: 10.1136/bmjopen-2014-004786 (PMC4067897; doi:10.1136/bmjopen-2014-004786), 2014-06-13
Supplement: bmjopen-2014-004786.draft_revisions.pdf [file bmjopen-2014-004786.draft_revisions.pdf]

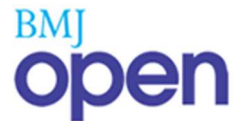

**Parents' perspectives on the value of assistance dogs for children with autism spectrum disorder: a cross sectional study**

|                                 |                                                                                                                                                                                                                                                                                                                 |
|---------------------------------|-----------------------------------------------------------------------------------------------------------------------------------------------------------------------------------------------------------------------------------------------------------------------------------------------------------------|
| Journal:                        | <i>BMJ Open</i>                                                                                                                                                                                                                                                                                                 |
| Manuscript ID:                  | bmjopen-2014-004786                                                                                                                                                                                                                                                                                             |
| Article Type:                   | Research                                                                                                                                                                                                                                                                                                        |
| Date Submitted by the Author:   | 06-Jan-2014                                                                                                                                                                                                                                                                                                     |
| Complete List of Authors:       | Burgoyne, Louise; University College Cork, Dowling, Lisa; University College Cork, School of Medicine Fitzgerald, Anthony; University College Cork, Epidemiology Connolly, Micaela; Brothers of Charity, Browne, John; University College Cork, Epidemiology Perry, Ivan; University College Cork, Epidemiology |
| <b>Primary Subject Heading</b>: | Public health                                                                                                                                                                                                                                                                                                   |
| Secondary Subject Heading:      | Epidemiology                                                                                                                                                                                                                                                                                                    |
| Keywords:                       | EPIDEMIOLOGY, PUBLIC HEALTH, PRIMARY CARE                                                                                                                                                                                                                                                                       |
|                                 |                                                                                                                                                                                                                                                                                                                 |

SCHOLARONE™  
Manuscripts

1  
2  
3  
4  
5  
6  
7 **Parents' perspectives on the value of assistance dogs for children with autism**  
8 **spectrum disorder: a cross sectional study**  
9

10  
11  
12  
13  
14 **Corresponding Author: Louise Burgoyne,**

15 **Institution: Department of Epidemiology & Public Health, University College Cork (UCC).**

16 **Contact: [l.burgoyne@ucc.ie](mailto:l.burgoyne@ucc.ie), ph.: 00-353-4205517, fax: 00-353-214205469.**  
17  
18  
19

20  
21 **Co-authors**

22 **Lisa Dowling, Final Year Medical Student, School of Medicine, UCC**

23 **Anthony Fitzgerald, Biostatistician, Department of Epidemiology & Public Health, UCC**

24 **Micaela Connolly, Psychologist, Brothers of Charity, Cork.**

25 **John Browne, Professor, Department of Epidemiology & Public Health, UCC**

26 **Ivan J Perry, Professor & Head of Department of Epidemiology & Public Health, UCC.**  
27  
28  
29  
30  
31  
32  
33

34 **Key Words**

35 **Public Health, Epidemiology, Autism Spectrum Disorders, Assistance Dogs, animal**  
36 **interventions.**  
37  
38  
39  
40  
41

42 **Word Count: Abstract = 300 words**

43 **Main document = 3,998 words (excluding title page, references, tables,**  
44 **figures and bullet pointed strengths and weaknesses)**  
45  
46  
47  
48

49 This research received no specific grant from any funding agency in the public, commercial  
50 or not for profit sector. Technical appendix, statistical code, and dataset available from the  
51 corresponding author at University College Cork, who will provide a permanent, citable and  
52 open access home for the dataset.  
53  
54  
55  
56  
57  
58  
59  
60

1  
2  
3  
4  
5  
6  
7  
8  
9  
10  
11  
12  
13  
14  
15  
16  
17  
18  
19  
20  
21  
22  
23  
24  
25  
26  
27  
28  
29  
30  
31  
32  
33  
34  
35  
36  
37  
38  
39  
40  
41  
42  
43  
44  
45  
46  
47  
48  
49  
50  
51  
52  
53  
54  
55  
56  
57  
58  
59  
60

**Abstract.**

**Background:** Whilst there is an emerging literature on the usefulness of assistance dogs for children with Autism Spectrum Disorder (ASD), there is a dearth of quantitative data on the value of assistance dogs programmes for the family unit and family functioning.

**Objectives:** Using previously validated scales and scales developed specifically for this study, we measured parents/guardians perceptions of having an assistance dog on (a) child safety from environmental dangers, (b) public reception of ASD, (c) levels of caregiver strain and sense of competence. We also obtained open ended response data from parents/guardians on benefits and constraints of having an assistance dog.

**Primary and Secondary Outcome Measures:** The primary outcome measures were scores on environmental hazards and public reception scales. Secondary outcome measures were scores on caregiver strain and competence scales.

**Setting:** This study was based in the primary care setting, within the context of a specific national assistance dog's programme in the Republic of Ireland.

**Participants:** A total of 134 parents/guardians with an assistance dog, and 87 from a waiting list control group were surveyed.

**Results:** Parents/guardians of children who have ASD and an assistance dog rate their child as significantly safer from environmental dangers ( $p < 0.001$ ), perceive that the public act more respectfully and responsibly towards their child ( $p < 0.001$ ), and feel more competent about managing their child ( $p = 0.023$ ) compared to controls. There was an intensity of positive feeling towards assistance dogs programmes. Safety and comfort for children, and a sense of freedom from family restrictions associated with ASD were regarded as the most important benefits of having an assistance dog. The amount of dedication and commitment

1  
2  
3 required to care for a dog were viewed as the primary constraints. **Conclusions:** Our  
4  
5 findings indicate that the assistance dog programmes can be a valuable intervention for  
6  
7 families with children who have ASD.  
8  
9

### 10 11 12 **Main Strengths and Limitations of this study** 13

- 14  
15 • This study is the first to capture the views of a large group of parents/guardians on  
16  
17 an assistance dog's intervention.  
18
- 19  
20 • Findings indicate the high value of dogs in promoting safety, security and positive  
21  
22 public reception for children with ASD.  
23
- 24  
25 • This study assessed the perceptions of waiting list controls as opposed to using a  
26  
27 stronger RCT design, where controls are randomly assigned to another intervention.  
28  
29  
30  
31  
32  
33  
34  
35  
36  
37  
38  
39  
40  
41  
42  
43  
44  
45  
46  
47  
48  
49  
50  
51  
52  
53  
54  
55  
56  
57  
58  
59  
60

## Introduction

The presence of animals as an intervention tool was first studied by psychotherapist Boris Levinson via a series of case studies.<sup>1</sup> At the time animals were seen as inferior replacements for human social interactions.<sup>2</sup> Since the 1970's animals have been used as a means of improving human physical, emotional, cognitive and social functioning. Animal interventions are classified into three groupings; animal assisted activities (AAA), animal assisted therapies (AAT) and service animal programmes (SAP).<sup>3</sup>

Animal assisted activities are delivered by trained personnel in environments such as hospitals and educational settings with an emphasis on quality of life enhancement via recreation and education e.g., therapeutic horse riding to treat populations with physical and mental disabilities.<sup>4-5</sup> Animal assisted therapies are practiced by professionals with individualised therapy goals.<sup>6</sup> The emphasis is on improvements in physical, social and cognitive functioning. A meta-analysis of the literature on AAT has shown that they are associated with moderate effect sizes in improving outcomes in four areas: autism spectrum symptoms, medical difficulties, behavioural problems, and emotional well-being.<sup>7</sup>

Service animal programmes (SAP) use dogs to assist people with a disability in performing daily activities. Service dogs live in-house with the people they work with. Of late assistance dogs have received growing attention as a means of aiding children with ASD. The presence of a dog has been shown to improve quality of life in children.<sup>8</sup> Social and cognitive benefits in addition to physical and medical benefits have been found.<sup>9-10</sup> Assistance dogs complete a unique triad between parent/guardian and child. Typically the child is attached to the dog via a lead (leash) and belt. The dog walks with the child but

1  
2  
3 takes commands from the parent (handler).<sup>11</sup> If the child tries to step off a footpath or  
4  
5 attempts to bolt, the dog will use all his/her power to slow the child down. Assistance dogs  
6  
7 prohibit dangerous behaviour such as elopement (bolting) and provide a calming presence.  
8  
9

10  
11  
12 Elopement or the tendency to 'bolt' is characteristic of ASD. Such behaviour can result in a  
13  
14 child's exposure to dangerous traffic situations or encounters with strangers.<sup>12</sup> Despite  
15  
16 reports of higher mortality rates in ASD populations owing to accidents such as suffocation,  
17  
18 drowning and injuries, research on elopement behaviour is sparse.<sup>13-15</sup> If left untreated  
19  
20 elopement may result in the need for a child to be moved to a restrictive setting.<sup>16</sup> In a  
21  
22 systematic review of the literature on current elopement treatments such as function based  
23  
24 interventions, Lang and colleagues conveyed that just two of ten studies examined reported  
25  
26 complete elimination of elopement.<sup>17</sup> Treatments that effectively eliminate elopement  
27  
28 behaviours are warranted.  
29  
30  
31  
32  
33  
34  
35

36 Social, emotional and behavioural challenges at home and in public mean that  
37  
38 parents/guardians of children with ASD experience stress in most areas of their lives.<sup>18-21</sup> In  
39  
40 addition to behaviours such as elopement, public tantrums and the reaction from others are  
41  
42 regarded as being some of the more difficult aspects of a child with ASD's behaviour.  
43  
44 Situations can leave parents/guardians feeling judged as 'bad' parents, or feeling like a  
45  
46 failure.<sup>22</sup> In this context assistance dogs can provide a unique support by facilitating child  
47  
48 safety and promoting positive public reception.  
49  
50  
51  
52  
53  
54

55 Currently there are 188 service animal programmes registered with the governing body  
56  
57 Assistance Dogs International (ADI). These programmes include guide dogs for the blind,  
58  
59  
60

1  
2  
3 hearing dogs for the hard of hearing, and service dogs for people with other disabilities  
4  
5 including autism. In this study we measured parents/guardians ratings on: (a) the impact of  
6  
7 having an assistance dog on child safety from environmental hazards, (b) public acceptance  
8  
9 and awareness of autism, (c) sense of competence with managing a child with autism and  
10  
11 (d) levels of caregiver strain. We also obtained parents/guardians views on the primary  
12  
13 benefits and constraints of having an assistance dog.  
14  
15  
16  
17  
18  
19

## 20 **Methods**

### 21 **Study Design and Participants**

22  
23 Our study was based in the primary care setting, within the context of a specific national  
24  
25 assistance dog's programme in the Republic of Ireland. Parents/guardians with an  
26  
27 assistance dog (N=205) and parents/guardians on the waiting list for an assistance dog  
28  
29 (N=107) were eligible to take part. Expedited ethical approval was granted from the Clinical  
30  
31 Research Ethics Committee of the Cork Teaching Hospitals. Data were gathered between  
32  
33 October 2012 and March 2013.  
34  
35  
36  
37  
38  
39

### 40 **Measures**

41  
42 Parents/guardians were asked to complete a four part questionnaire (Table 1). Part one  
43  
44 examined child demographics. Part two measured parents/guardians sense of competence  
45  
46 for managing a child with autism using Perceived Competence Scales (PCS)<sup>24</sup> ( $\alpha = 0.876$ , 7  
47  
48 point scales: low-high competence). It also assessed levels of strain using the Caregiver  
49  
50 Strain Questionnaire CGSQ<sup>25</sup> ( $\alpha = 0.940$ , 5 point scales: low-high strain), which has been  
51  
52 validated to assess burden among caregivers of children with autism.<sup>26</sup> Part three examined  
53  
54 perceptions of child safety from environmental hazards such as traffic, dangerous materials  
55  
56  
57  
58  
59  
60

1  
2  
3 and outdoor spaces ( $\alpha=0.928$ , 7 point scales: low-high safety/security). Additionally it  
4  
5 assessed parents/guardians ratings on the general public's acceptance of their child  
6  
7 ( $\alpha=0.940$ , 7 point scales: low-high acceptance). Scales for part three were developed with  
8  
9 reference to the format and structure of the Neighbourhood Environment Walkability Scale  
10  
11 – Youth<sup>27</sup>, and via consultation with parents and author MC, who is a psychologist  
12  
13 specialising in children with autism. Part four asked participants to give their views of the  
14  
15 main benefits/constraints of having an assistance dog. Those on the waiting list were asked  
16  
17 to give the benefits/constraints that they feel a dog will bring.  
18  
19  
20  
21  
22  
23

#### 24 **Pilot**

25  
26 We piloted the questionnaire with eight parents/guardians, four of which have an assistance  
27  
28 dog and four who are on the waiting list. Minor modifications were made to the final  
29  
30 questionnaire on the basis of their responses.  
31  
32

#### 33 **Procedures**

34  
35 The primary caregiver from each family with an assistance dog, and each family on the  
36  
37 waiting list received a postal questionnaire from the contact person at the assistance dog's  
38  
39 centre. In the interests of confidentiality, the researchers at University College Cork did not  
40  
41 have access to names and addresses of participants. The assistance dog's centre did not  
42  
43 have access to the completed questionnaires. Each questionnaire pack contained a consent  
44  
45 form with study details, a questionnaire, a stamped addressed envelope, and an envelope  
46  
47 marked 'Research'. Participants were requested to place completed questionnaires in the  
48  
49 envelope marked 'Research' and to seal it. They were asked to place the sealed envelope  
50  
51 with the signed consent form in the stamped addressed envelope, and to post back to the  
52  
53  
54  
55  
56  
57  
58  
59  
60



1  
2  
3 assistance dog's centre. Participants were assured that participation in the study would  
4  
5 have no impact on their status with the centre.  
6  
7  
8  
9

## 10 **Data Analysis**

11  
12 Descriptive statistics are reported using frequencies tables. T-tests were used to test for  
13  
14 differences within the data on competence, caregiver strain (CGSQ), environmental hazards  
15  
16 and public awareness. We adjusted for age, gender, location and type of school attended  
17  
18 using a linear regression model. Qualitative data were analysed thematically, coded and  
19  
20 cross checked by authors LB and LD.  
21  
22  
23  
24  
25  
26

## 27 **Results**

### 28 **Demographics**

29  
30 A total of 134 parents/guardians with an assistance dog (65% response), and 87  
31  
32 parents/guardians from the waiting list controls (81% response) completed the  
33  
34 questionnaire. A large proportion of participants with a dog have children over the age of  
35  
36 ten (40%) compared to just three participants from the waiting list. For this reason we  
37  
38 eliminated the 'over tens' from further analysis in this paper.  
39  
40  
41  
42  
43  
44

45  
46 A breakdown of the demographic characteristics of participants' children is in Table 2. A  
47  
48 majority are male (87.5% with dog; 91.7% waiting list) and similar percentages have other  
49  
50 medical conditions in addition to ASD (35% with dog; 32.1% waiting list). The largest group  
51  
52 live in suburban areas (41.3% with dog; 57% waiting list) followed by the countryside (45%  
53  
54 with dog; 34% waiting list). Over half of the children with a dog are verbal (52.5%) and  
55  
56 under half of the waiting list controls are verbal (42%). There are differences in types of  
57  
58  
59  
60

1  
2  
3 school attended between participants whose children have an assistance dog and controls.  
4  
5 These are reflective of the remaining age differences between the two groups post removal  
6  
7 of the over tens from the total sample. The main difference is that 61.3% of children with a  
8  
9 dog attend a special school for ASD compared to 35.7% of waiting list controls. Conversely  
10  
11 34.5% of controls are in a special class in primary school compared to 21.3% who have a  
12  
13 dog.  
14  
15

16  
17  
18  
19 With regard to conventional interventions received there are some descriptive differences  
20  
21 between participants whose children have an assistance dog and waiting list controls (Table  
22  
23 2). There is a less than 10% difference between the groups for regular speech and language  
24  
25 therapy (47.5% with dog; 38.1% waiting list) and regular occupational therapy (46.3% with  
26  
27 dog; 38.1% waiting list). Similar percentages from both groups have a resource teacher  
28  
29 (25% with dog; 26.2% waiting list), and there is a 12% difference with regard to special  
30  
31 needs assistants (80% with dog; 67.9% waiting list)  
32  
33  
34  
35  
36  
37

38  
39 There are significant differences between profiles of children who have a dog and waiting  
40  
41 list controls with respect to gender, age and schooling. There are no significant differences  
42  
43 between the groups for other conditions in addition to ASD, whether a child is verbal or  
44  
45 nonverbal, conventional interventions and home location.  
46  
47  
48  
49

### 50 **Environmental Hazards & Public Awareness**

51  
52 The environmental hazards scales are summarized in Table 4. Ratings are from low  
53  
54 perceived safety to high safety. Mean ratings are higher for parents/guardians whose  
55  
56 children have a dog (32.43) than for those on the waiting list (22.97). These differences  
57  
58  
59  
60

1  
2  
3 remain significant after adjustment for gender, age, home location and school type  
4  
5 (p<0.001). We did however find a significant interaction between school types and  
6  
7 whether children have a dog. Although there are significant differences between the rating  
8  
9 of parents/guardians with a dog and those on the waiting list for children attending a special  
10  
11 school for autism (mean difference=6.62: 95%CI 0.639, 12.61), the effect is not as large as it  
12  
13 is for children attending a primary school (mean difference=12.53: 95%CI 4.16, 20.90) or a  
14  
15 special class in a primary school (mean difference=19.49: 5%CI 13.171, 25.821).  
16  
17  
18  
19

20  
21 The range of scores from the public perception scales (Table 3) are from low to high, with  
22  
23 higher scores indicating a perception from parents/guardians that people act more  
24  
25 respectfully and responsibly towards children with ASD when in public settings.  
26  
27

28  
29 Parents/guardians mean ratings are higher for those whose children have an assistance dog  
30  
31 (15.87) than for controls (10.67). For the most part these differences remain significant  
32  
33 after adjusting for gender, age, home location and education level (p<0.001). However,  
34  
35 there was a significant interaction between type of school attended and whether children  
36  
37 have an assistance dog. Although there are significant differences between the ratings of  
38  
39 parents/guardians with a dog and waiting list controls where their children attend a special  
40  
41 school for autism (mean difference=6.65: 95%CI 3.79, 9.51), and a special class in primary  
42  
43 school (mean difference=7.01: 95%CI 2.88, 11.13), there is no significant difference in the  
44  
45 ratings of parents/guardians who have a child in a main stream primary school (p=0.09).  
46  
47  
48  
49  
50  
51

## 52 **Perceived Competence and Caregiver Strain**

53  
54 A summary of results from parents/guardians perceived competencies with regard to caring  
55  
56 for and managing their child with ASD are in Table 3. Mean scores for parents/guardians  
57  
58  
59  
60

1  
2  
3 whose children have an assistance dog (19.75) show higher perceived competencies than  
4  
5 waiting list controls (17.91). This difference remained significant after adjusting for gender,  
6  
7 age, home location and education level ( $p=0.02$ ). Results from the Caregiver Strain  
8  
9 Questionnaire (CGSQ) (Table 3) show that parents/guardians rated the questionnaire items  
10  
11 similarly. We found no significant differences between the groups with regard to any of the  
12  
13 individual items on the scales, or the summarized scores for 'objective strain', 'subjective  
14  
15 internalized strain', and 'subjective externalized strain'.  
16  
17  
18  
19  
20  
21

### 22 **Benefits and Constraints**

23  
24 Qualitative data were analysed using a thematic approach and constant comparison  
25  
26 techniques by authors LB and LD. The initial qualitative analysis was performed by LB, and  
27  
28 these results were cross-checked and refined by LD. We analysed the first and second listed  
29  
30 benefits and constraints of having an assistance dog. Data beyond the first two benefits and  
31  
32 constraints are sparse and not reported.  
33  
34  
35  
36  
37

38  
39 Three themes were identified under 'benefits'. These were; physical factors, relationship  
40  
41 factors and family factors (Figure 1). 'Physical factors' is divided into four categories and  
42  
43 focuses on how assistance dogs can keep a child safe whilst facilitating parents' ability to  
44  
45 manage: *"A sense of security & protection for our daughter especially walking in local*  
46  
47 *environments" (parent of girl 7-9yo with a dog), "(Dog) will stop child from bolting from*  
48  
49 *home" (parent of boy 4-6yo on waiting list)*. For 3 out of 4 categories, this theme is evenly  
50  
51 dispersed between parents who have a dog and waiting list controls. For the fourth  
52  
53 category 'no bolt', more parents/guardians from the waiting list state the benefit of the dog  
54  
55 being able to stop the child from eloping. 'Relationship factors' is grouped into two  
56  
57  
58  
59  
60

1  
2  
3 categories and centres on the direct positive relationship between the child with ASD and  
4  
5 his/her assistance dog: *"She is his very best friend"* (parent of boy 4-6yo with a dog), *"It*  
6  
7 *might calm him down instead of him head banging the windows"* (parent of boy 4-6yo on  
8  
9 *waiting list*). The categories making up this theme are almost evenly dispersed between  
10  
11 parents/guardians who have a dog and waiting list controls. 'Family factors' is split into five  
12  
13 categories and is about how day to day family and social life is affected by the introduction  
14  
15 of an assistance dog: *"Ability to do maybe ordinary things and go to ordinary places"* (parent  
16  
17 *of boy 7-9yo on waiting list*), *"a sense of responsibility, for example he can feed the dog"*  
18  
19 *(parent of boy 4-6yo with a dog)*. There were differences in the dispersal of this theme  
20  
21 among parents/guardians with a dog and those on the waiting list. For example benefits  
22  
23 listed by those with a dog formed more of the category 'visibility', which is about public  
24  
25 reception and awareness of ASD. Benefits listed by parents/guardians on the waiting list  
26  
27 formed more of the categories 'social' and 'emotion and stress'. 'Social' is about a child  
28  
29 with ASD's sociability with family and outside the home. 'Emotion and stress' is about levels  
30  
31 of emotion/stress in the family, and to a lesser extent the ability of the child to express  
32  
33 emotion.  
34  
35  
36  
37  
38  
39  
40  
41  
42

43 Four themes emerged from the data on constraints. These were; 'change factors',  
44  
45 'relationship factors', 'limiting factors' and 'no constraints' (Figure 2). Change factors has  
46  
47 three categories and focuses on life style challenges that parents/guardians experience or  
48  
49 anticipate experiencing when they have an assistance dog: *"Its' like an additional child in the*  
50  
51 *family"*(parent of boy 4-6yo with a dog), *"To make time to go for walks everyday"* (parent of  
52  
53 *boy 7-9yo on waiting list*). The categories comprising this theme are quite evenly dispersed  
54  
55 between parents/guardians of children with a dog and those on the waiting list. Slightly  
56  
57  
58  
59  
60

1  
2  
3 more parents/guardians waiting for a dog list 'dedication', which is the time and effort given  
4  
5 to care for the dog as a main constraint. As with the benefits themes, 'relationship factors'  
6  
7 is about the direct relationship between the child with ASD and the dog: *"My son may not*  
8  
9 *connect with the dog"* (parent of boy 4-6yo on waiting list), *"my concern is when the dog has*  
10  
11 *to retire, how will my child cope?"* (parent of boy 7-9yo with a dog). More  
12  
13 parents/guardians on the waiting list make up the category 'acceptance', which is  
14  
15 concerned about how the dog will be accepted by the child and other family members. The  
16  
17 third theme 'limiting factors' has four associated categories and centres on day to day  
18  
19 constraints of having a dog on family life; *"Extra expense for food, vet bills etc"* (parent of  
20  
21 *boy 7-9yo with a dog)*, *"it will be a bit difficult to travel"* (parent of boy 4-6yo on waiting list).  
22  
23 There are large differences in the dispersal of two of the categories within this theme. In  
24  
25 particular, more parents/guardians whose children have a dog contributed to the category  
26  
27 'clean', which is about day to day hygiene activities related to the dog e.g., dog hair in the  
28  
29 house and dealing with dog toileting. More parents/guardians on the waiting list  
30  
31 contributed to a category on 'holidays', which expressed concerns about going on holidays  
32  
33 with the dog. The final theme 'no constraints' has just one category. This was a category in  
34  
35 which parents/guardians stated no issues for concern or anticipated drawbacks; *"There are*  
36  
37 *none....our dog is a valuable and much loved addition to the family"* (parent of boy 7-9yo  
38  
39 *with a dog)*, *"don't anticipate any, feeling very positive about it"* (parent of boy 4-6yo on  
40  
41 *waiting list)*. This category was almost evenly dispersed between parents whose children  
42  
43 have a dog and those on the waiting list.  
44  
45  
46  
47  
48  
49  
50  
51  
52  
53  
54

## 55 Discussion

56  
57  
58  
59  
60

1  
2  
3 Our study is the first to capture the views of a large group of parents/guardians on an  
4  
5 assistance dog's intervention. Quantitative findings indicate the value of dogs in promoting  
6  
7 safety, security and positive public reception for children with ASD. They also suggest that  
8  
9 the presence of an assistance dog can make parents/guardians feel more competent with  
10  
11 managing their child. Qualitative findings indicate the role assistance dogs play in  
12  
13 promoting child safety, calmness and provision of friendship. They also highlight the role  
14  
15 the dog has in facilitating 'normal' family functioning, such as being able to visit a shopping  
16  
17 centre. Constraints associated with having a dog relate to specific lifestyle changes  
18  
19 experienced by parents/guardians and the larger family group, such as dedicated care of the  
20  
21 dog.  
22  
23  
24  
25  
26  
27  
28

29 There are several study limitations. Firstly, our findings are based on self-reports and are  
30  
31 subject to participant overestimation and recall bias. Secondly, there were considerable  
32  
33 differences in children's ages and type of schools attended between our two sample groups  
34  
35 which resulted in removal of the over tens from our analyses and a reduction in sample size.  
36  
37 Thirdly we did not assess the views of parents/guardians who do not want an assistance dog  
38  
39 for their child. The fourth and main limitation of the study is that we assessed the  
40  
41 perceptions of waiting list controls as opposed to using a RCT design, where controls are  
42  
43 randomly assigned to another intervention. Such a design was not feasible however and the  
44  
45 current data do provide insights.  
46  
47  
48  
49  
50  
51  
52

53 Recognition of the value animal interventions play in promoting human health is gaining  
54  
55 momentum. Animal interventions have been shown to produce increases in self-efficacy  
56  
57 and coping in psychiatric patients<sup>28-29</sup> promote recovery from ill health<sup>30, 2, 31</sup>, and improve  
58  
59  
60

1  
2  
3 academic performance, adaptive functioning and behavioural/emotional problems with  
4  
5 special education adolescents.<sup>32</sup> Autism spectrum disorder is one of the areas within which  
6  
7 animal interventions have had most success.<sup>7</sup> This is particularly the case for assistance dog  
8  
9 programmes, since dogs not only provide a possible mechanism for promoting  
10  
11 improvements in social and behavioural functioning, they also play a part in control of  
12  
13 elopement and promotion of child safety. Once a child is attached to a dog they cannot  
14  
15 'bolt'. In this study parents/guardians with a dog rated their child as considerably more safe  
16  
17 from environmental hazards than did waiting list controls. We did find a reportable  
18  
19 interaction between having an assistance dog, type of school attended and  
20  
21 parents/guardians ratings. This interaction indicated a lesser albeit significant effect of  
22  
23 having a dog for parents/guardians whose children attend a special school for ASD. The  
24  
25 smaller effect may be due to the specific care that children and families receive from ASD  
26  
27 schools. Currently there are no other interventions that can successfully eliminate  
28  
29 elopement among children with ASD.<sup>17</sup> Our quantitative findings authenticate the role of  
30  
31 assistance dogs in providing this service. Our qualitative findings provide additional  
32  
33 validation with safety and security being the most frequently stated benefit of having a dog.  
34  
35  
36  
37  
38  
39  
40  
41  
42  
43 Behavioural, social and emotional difficulties that encompass the lives of children with ASD  
44  
45 can impact on parents/guardians wellbeing.<sup>18-19</sup> Our findings suggest that assistance dogs  
46  
47 can provide parents/guardians with a higher sense of competency with regard to managing  
48  
49 their child than waiting list controls. This result may reflect added supports dogs provide in  
50  
51 public settings. Indeed public tantrums and reactions from the public are regarded as one  
52  
53 of the more difficult aspects of a child with ASD's behaviour.<sup>22</sup> Qualitative results from this  
54  
55 study highlight the role that an assistance dog has in promoting public awareness and  
56  
57  
58  
59  
60



1  
2  
3 acceptance of ASD. Quantitative results suggest that parents/guardians whose children  
4  
5 have assistance dogs rate the public's perception of their child as more positive. Our  
6  
7 regression analysis did show an interaction between having an assistance dog and type of  
8  
9 school attended. On examination we found that whilst the ratings of parents/guardians  
10  
11 remained significantly different where their children attend a special school for autism or a  
12  
13 special class in primary school, they were not significantly so where children attend a main  
14  
15 stream primary school. Such a result may reflect a lack of awareness/acceptance of ASD in  
16  
17 main stream schools.  
18  
19  
20  
21

22  
23  
24 Our findings from the caregiver strain questionnaire (CSGQ) show no significant differences  
25  
26 between parents/guardians who have a child with a dog and waiting list controls. There are  
27  
28 three sub scales within the CSGQ. 'Objective strain' deals with the caregiver burden on day  
29  
30 to day tasks related to care, 'subjective internalized strain' deals with negative feelings  
31  
32 internal to the caregiver, and 'subjective externalized strain' deals with negative feelings by  
33  
34 the caregiver towards the child. We considered two reasons which may explain the lack of  
35  
36 any real differences between the groups with regard to caregiver strain. Firstly  
37  
38 parents/guardians expressed that the dedication required to care for a dog is a main  
39  
40 constraint which may have affected responses on the objective strain scale. Secondly, we  
41  
42 noticed that our sample scores on the CSGQ were generally less positive than scores from  
43  
44 parents/guardians who took part in the most recent CSGQ validation study.<sup>26</sup> This may  
45  
46 reflect a lower provision of services for families of children with autism in the Republic of  
47  
48 Ireland. The ability of assistance dogs to provide a sense of calm and comfort for children  
49  
50 with ASD is documented.<sup>8,10</sup> Qualitative results from this study lend support to this view.  
51  
52  
53  
54  
55  
56  
57 Parents/guardians with an assistance dog frequently mentioned the dogs' ability to promote  
58  
59  
60

1  
2  
3 calmness in their child. Those on the waiting list anticipated ways in which the dog would  
4  
5 aid their child in times of distress. Previous research has recognised the role that dogs have  
6  
7 in facilitating social development in children with ASD.<sup>9, 33- 34</sup> Our qualitative findings point  
8  
9 to the idea that assistance dogs can act as a 'bridge' between children and the physical and  
10  
11 social environment. However, more parents/guardians on the waiting list for a dog wrote  
12  
13 about the anticipated ability of a dog to promote social development in their children than  
14  
15 those with a dog. Those with a dog wrote more about the increased public awareness and  
16  
17 acceptance of their child as a main benefit. That dogs may facilitate social interaction in  
18  
19 children with ASD is not in dispute, but perhaps this role is more suited to the therapy dog  
20  
21 (AAT) than the service dog. Parents/guardians listed constraints of having an assistance dog  
22  
23 were centred on the lifestyle changes. Such changes include the care and costs required to  
24  
25 ensure a dogs' health and wellbeing in addition to the restrictions associated with the dogs'  
26  
27 requirements for exercise and companionship. It is important to recognise that each  
28  
29 parent/guardian has a different level of tolerance for specific canine behaviours.<sup>35</sup> Whilst  
30  
31 many of the parents/guardians in our study discounted the constraints of having a dog,  
32  
33 some were explicit about their concerns. More of those with a dog expressed concern  
34  
35 about the increase in housekeeping tasks associated with having a dog in house.  
36  
37 Parents/guardians with children on the waiting list were more concerned about what to do  
38  
39 with the dog during family holiday time.  
40  
41  
42  
43  
44  
45  
46  
47  
48  
49

## 50 **Conclusions**

51  
52 Our findings indicate that assistance dog programmes are a valuable intervention in the  
53  
54 treatment of ASD, particularly in relation to the control of elopement. Dogs help to  
55  
56 promote calmness and provide a source of comfort for children. Further research with  
57  
58  
59  
60

1  
2  
3 stronger designs is required to support the case that assistance dogs can act as facilitators of  
4  
5 social and emotional development in children.  
6  
7  
8  
9  
10  
11  
12  
13  
14  
15  
16  
17  
18  
19  
20  
21  
22  
23  
24  
25  
26  
27  
28  
29  
30  
31  
32  
33  
34  
35

### 36 **Funding Statement**

37  
38 This research received no specific grant from any funding agency in the public, commercial  
39  
40 or not for profit sectors.  
41  
42

### 43 **Contributorship Statement**

44  
45 Louise Burgoyne was the lead researcher and was involved in the design, implementation, analysis  
46  
47 and reporting of the study.  
48  
49  
50

51  
52 Lisa Dowling took part of the project as her final year medical project. She was involved in the  
53  
54 qualitative analysis and interpretation together with the overall reporting of the study and approval  
55  
56 of the manuscript.  
57  
58  
59  
60

1  
2  
3  
4  
5 Anthony (Tony) Fitzgerald is the study statistician responsible for interpretation of the quantitative  
6  
7 data and final approval of the manuscript.  
8

9  
10 Micaela Connolly is a psychologist specializing in children with autism. She was involved in the study  
11  
12 design and was clinical adviser to the group throughout the course of research. She was also  
13  
14 involved in the study reporting and approval of the manuscript.  
15

16  
17  
18 John Browne is a psychologist and health services researcher. He was involved in the study analysis  
19  
20 critical review and approval of the manuscript.  
21  
22

23  
24  
25 Ivan J Perry was the main project supervisor. He was responsible for overseeing the project from  
26  
27 start to finish and approved the final manuscript.  
28

### 29 **Data Sharing Statement**

30  
31 Technical appendix, statistical code, and dataset available from the corresponding author at  
32  
33 University College Cork, who will provide a permanent, citable and open access home for the  
34  
35 dataset.  
36

37  
38 Technical appendix, statistical code, and dataset available from the corresponding author at  
39  
40 University College Cork, who will provide a permanent, citable and open access home for the  
41  
42 dataset.  
43

44 **Competing Interests:** None  
45  
46  
47

### 48 **References**

- 49  
50  
51 1. Levinson (1969). Pet-oriented Child Psychotherapy Springfield Illinois, Charles C Thomas.  
52  
53 2. Endenburg, N. and H. A. van Lith (2011). "The influence of animals on the development of  
54  
55 children." Vet J 190(2): 208-214.  
56  
57  
58  
59  
60

- 1  
2  
3 3. Lasa, S. M., G. Ferriero, et al. (2011). "Animal-assisted interventions in internal and  
4 rehabilitation medicine: a review of the recent literature." *Panminerva Medica* 53(2): 129-  
5 136.  
6
- 7  
8 4. Bass, M., C. Duchowny, et al. (2009). "The Effect of Therapeutic Horseback Riding on  
9 Social Functioning in Children with Autism." *Journal of Autism and Developmental Disorders*  
10 39(9): 1261-1267.  
11
- 12 5. Kern, J. K., C. L. Fletcher, et al. (2011). "Prospective Trial of Equine-assisted Activities in  
13 Autism Spectrum Disorder." *Alternative Therapies in Health and Medicine* 17(3): 14-20.  
14
- 15 6. Parish-Plass, N. (2008). "Animal assisted therapy with children suffering from insecure  
16 attachment due to abuse and neglect: a method to lower the risk of intergenerational  
17 transmission of abuse?" *Clinical Child Psychology and Psychiatry* 13(2): 23.  
18
- 19 7. Nimer, B. L. J. (2007). "Animal assisted therapy: a meta analysis." *Anthrozoos* 20: 13.  
20
- 21 8. Burrows, K. E., C. L. Adams, et al. (2008). "Sentinels of Safety: Service Dogs Ensure Safety  
22 and Enhance Freedom and Well-Being for Families With Autistic Children." *Qualitative*  
23 *Health Research* 18(12): 1642-1649.  
24
- 25 9. Davis, B. W., K. Natrass, et al. (2004). "Assistance dog placement in the pediatric  
26 population: Benefits, risks, and recommendations for future application." *Anthrozoos* 17(2):  
27 130-145.  
28
- 29 10. Viau, R., G. Arsenault-Lapierre, et al. (2010). "Effect of service dogs on salivary cortisol  
30 secretion in autistic children." *Psychoneuroendocrinology* 35(8): 1187-1193.  
31
- 32 11. Burrows, K. E., C. L. Adams, et al. (2008). "Factors affecting behavior and welfare of  
33 service dogs for children with autism spectrum disorder." *J Appl Anim Welf Sci* 11(1): 42-62.  
34
- 35 12. Piazza, C. C., G. P. Hanley, et al. (1997). "Functional analysis and treatment of  
36 elopement." *J Appl Behav Anal* 30(4): 653-672.  
37
- 38 13. Shavelle RM, Strauss DJ, Pickett J. Causes of death in autism. *J Autism Dev Disord.*  
39 2001;31(6):569–576  
40
- 41 14. McIlwain L, Fournier W. Wandering and autism: the need for data and resources.  
42 National Autism Association; 2010. Available at: [http://iacc.hhs.gov/events/2010/slides\\_fournier\\_mcilwain\\_102210.pdf](http://iacc.hhs.gov/events/2010/slides_fournier_mcilwain_102210.pdf).  
43
- 44 15 Anderson, C., J. K. Law, et al. (2012). "Occurrence and family impact of elopement in  
45 children with autism spectrum disorders." *Pediatrics* 130(5): 870-877.  
46
- 47 16. Perrin, C. (2008). "Brief functional analysis and treatment of elopement in preschoolers  
48 with autism." *Behavioural Interventions* 23: 8.  
49  
50  
51  
52  
53  
54  
55  
56  
57  
58  
59  
60

17. Lang, R., M. Rispoli, et al. (2009). "Treatment of elopement in individuals with developmental disabilities: a systematic review." *Res Dev Disabil* 30(4): 670-681.
18. Firth, I. and R. Dryer (2013). "The predictors of distress in parents of children with autism spectrum disorder." *J Intellect Dev Disabil* 38(2): 163-171.
19. Seymour M, Wood C, Giallo R, Jellett R J (2013) Fatigue, stress and coping in mothers of children with an autism spectrum disorder *Autism Dev Disord*. Jul;43(7):1547-54
20. de Andrés-García S, Sariñana-González P, Romero-Martínez A, Moya-Albiol L, Gonzalez-Bono E. (2013) Cortisol response to stress in caregivers of offspring with autism spectrum disorder is associated with care recipient characteristics. *Stress* 16(5): 510-9
21. Hayes SA, Watson SL. (2013) The impact of parenting stress: a meta-analysis of studies comparing the experience of parenting stress in parents of children with and without autism spectrum disorder. *J Autism Dev Disord* 43 (3): 629-42.
22. Ludlow, A., C. Skelly, et al. (2012). "Challenges faced by parents of children diagnosed with autism spectrum disorder." *J Health Psychol* 17(5): 702-711.
23. IGDB 2013 Assistance Dogs for families of children with autism.  
[http://www.guidedogs.ie/iopen24/assistance-dogs-t-3\\_9.html](http://www.guidedogs.ie/iopen24/assistance-dogs-t-3_9.html)
24. Williams, G. C., Freedman, Z.R., & Deci, E. L. (1998). Supporting autonomy to motivate glucose control in patients with diabetes. *Diabetes Care*, 21, 1644-1651
25. Brannan AM, Heflinger CA and Bickman L (1997) The caregiver strain questionnaire: measuring the impact on the family of living with a child with serious emotional problems, *Journal of Emotional and Behavioural Disorders* 5(4): 212-222.
26. Khanna R, Madhavan S, Smith MJ, Tworek C, Patrick JH, Becker-Cottrill B. (2011) Psychometric properties of the Caregiver Strain Questionnaire (CGSQ) among caregivers of children with autism. *Autism*. 16 (2), 179-99.
27. Rosenberg D, Ding D, Sallis JF, Kerr J, Norman GJ, Durant N, Harris SK, Saelens BE (2009) Neighborhood Environment Walkability Scale for Youth (NEWS-Y): reliability and relationship with physical activity. *Prev Med*. 49(2-3):213-8.
28. Berget B, Ekeberg O, Braastad B (2008) Animal assisted therapy with farm animals for persons with psychiatric disorders: effects on self efficacy, coping ability and quality of life, a randomised controlled trial. *Clin Pract Epidemiol Ment Health*, 4: 9.
29. Bizub AL, Joy A, Davidson L. (2003) "It's like being in another world": demonstrating the benefits of therapeutic horseback riding for individuals with psychiatric disability. *Psychiatr Rehabil J*. 2003 Spring;26(4):377-84.

- 1  
2  
3 30. Friedmann, E., & Thomas, S. A. (1995). Pet ownership, social support, and one year  
4 survival after acute myocardial infarction in the cardiac arrhythmia suppression trial (CAST).  
5 American Journal of Cardiology, 76, 1213–1217.  
6  
7  
8 31. Morrison, M. L. (2007). Health benefits of animal-assisted interventions. Complementary  
9 Health Practice Review, 12(1), 51–62.  
10  
11 32. Katcher, A H & Teumer, S P (2006). A four year trial of animal assisted therapy with  
12 public school special education students.. Handbook on animal assisted therapy: theoretical  
13 foundations and guidelines. Aubrey fine (2<sup>nd</sup> ed) Academic Press San diego.  
14  
15  
16 33. Solomon O, 2010 What a dog can do: children with autism and therapy dogs in social  
17 interaction. Journal of the society for psychological anthropology. 38: 1 143-166.  
18  
19  
20 34. Guest CM, Collis GM, McNicholas J. (2006). Hearing dogs: a longitudinal study of social  
21 and psychological effects on deaf and hard-of-hearing recipients. J Deaf Stud Deaf Educ.  
22 2006 Spring;11(2):252-61. Epub 2006 Feb 1.  
23  
24 35. Sanders C R (2004). Excusing tactics: social responses to the public misbehaviour of  
25 companion animals. Anthrozoos, 4, 82-90.  
26  
27  
28  
29  
30  
31  
32  
33  
34  
35  
36  
37  
38  
39  
40  
41  
42  
43  
44  
45  
46  
47  
48  
49  
50  
51  
52  
53  
54  
55  
56  
57  
58  
59  
60

1  
2  
3  
4  
5  
6  
7  
8  
9  
10  
11  
12  
13  
14  
15  
16  
17  
18  
19  
20  
21  
22  
23  
24  
25  
26  
27  
28  
29  
30  
31  
32  
33  
34  
35  
36  
37  
38  
39  
40  
41  
42  
43  
44  
45  
46  
47  
48  
49

Table 1 Questionnaire subsections, details and measures.

| Section                                   | Details                                                                                                                                                                                                                                                                                               | Measure                                                                                                                 |
|-------------------------------------------|-------------------------------------------------------------------------------------------------------------------------------------------------------------------------------------------------------------------------------------------------------------------------------------------------------|-------------------------------------------------------------------------------------------------------------------------|
| <b>Part 1. Demographics</b>               | <ol style="list-style-type: none"> <li>Gender, age, other medical conditions, age of diagnosis, home location.</li> <li>Education, learning level, verbal/non verbal Interventions and therapies received</li> </ol>                                                                                  | Tick boxes, yes/no options, free text.                                                                                  |
| <b>Part 2. Parenting &amp; Autism</b>     | <ol style="list-style-type: none"> <li>Perceived competence</li> <li>Caregiver strain questionnaire               <ul style="list-style-type: none"> <li><i>Objective strain</i></li> <li><i>Subjective internalised strain</i></li> <li><i>Subjective externalised strain</i></li> </ul> </li> </ol> | <p>Four items on a 7-point scale.</p> <p>21 items on a 5 point scale.</p> <p>11 items</p> <p>6 items</p> <p>4 items</p> |
| <b>Part 3. Environment &amp; Public</b>   | <ol style="list-style-type: none"> <li>Environment safety and security</li> <li>Public Perception</li> </ol>                                                                                                                                                                                          | <p>Eight items on a 7-point scale.</p> <p>Four items on a 7-point scale.</p>                                            |
| <b>Part 4. Benefits &amp; constraints</b> | <ol style="list-style-type: none"> <li>Benefits of having an assistance dog</li> <li>Constraints of having an assistance dog</li> </ol>                                                                                                                                                               | Free text.                                                                                                              |



Table 2 Participant Characteristics (With Dog n=80, Waiting list for Dog n=84)

| <i>Characteristics</i>  |                         | <i>With Dog<br/>N (%)</i> | <i>Waiting for Dog<br/>N (%)</i> | <i>P-value</i> |
|-------------------------|-------------------------|---------------------------|----------------------------------|----------------|
| <b>Gender</b>           | Male                    | 70 (87.5)                 | 77 (91.7)                        | <0.001         |
| <b>Age</b>              | 0-6 years               | 30 (37.5)                 | 60 (71.4)                        | <0.001         |
|                         | 7-9 years               | 50 (62.5)                 | 24 (28.6)                        |                |
| <b>Location</b>         | Town/city centre        | 11 (13.8)                 | 8 (9.0)                          | 0.217          |
|                         | Suburb                  | 33 (41.3)                 | 47 (57.0)                        |                |
|                         | Countryside             | 36 (45.0)                 | 28 (34.0)                        |                |
| <b>Other conditions</b> | Yes                     | 47 (35.0)                 | 27 (32.1)                        | 0.767          |
| <b>Verbal</b>           | Yes                     | 42 (52.5)                 | 35 (42.0)                        | 0.165          |
| <b>Education</b>        | Preschool               | 0                         | 10 (11.9)                        | <0.001         |
|                         | Home tuition            | 1 (1.0)                   | 4 (5.0)                          |                |
|                         | Primary                 | 13 (16.3)                 | 11 (31.1)                        |                |
|                         | Special class (Primary) | 17 (21.3)                 | 29 (34.5)                        |                |
|                         | Special school (ASD)    | 49 (61.3)                 | 30 (35.7)                        |                |
| <b>Interventions</b>    | Speech and Language     | 38 (47.5)                 | 32 (38.1)                        | 0.224          |
|                         | Occupational Therapy    | 37 (46.3)                 | 32 (38.1)                        | 0.290          |
|                         | Resource Teacher        | 20 (25.0)                 | 22 (26.2)                        | 0.861          |
|                         | Special Needs Assistant | 64 (80.0)                 | 57 (67.9)                        | 0.077          |

1  
2  
3  
4  
5  
6  
7  
8  
9  
10  
11  
12  
13  
14  
15  
16  
17  
18  
19  
20  
21  
22  
23  
24  
25  
26  
27  
28  
29  
30  
31  
32  
33  
34  
35  
36  
37  
38  
39  
40  
41  
42  
43  
44  
45  
46  
47  
48  
49

Table 3. Summary of results from Environmental Hazards, Public Awareness, Competence and Caregiver Strain scales.

| Item   | Description                                 | Mean (95%CI)         |                      | Diff* (95% CI)      | P-value             |
|--------|---------------------------------------------|----------------------|----------------------|---------------------|---------------------|
|        |                                             | With Dog (n=80)      | Waiting Dog (n=84)   |                     |                     |
| HAZ    | Environmental Hazards (range 8 -56)         | 32.43 (29.47: 35.39) | 22.97 (20.83: 25.11) | 10.9 (6.97, 14.89)  | <0.001 <sup>1</sup> |
| PUBLIC | Public Acceptance(range 4 –28)              | 15.87 (14.23: 17.50) | 10.67 (9.56:11.77)   | 5.80 (3.69, 7.90)   | <0.001 <sup>2</sup> |
| SD     | Competence (range 4 – 28)                   | 19.75 (18.74:20.77)  | 17.91 (16.52: 18.92) | 1.97 (0.273, 3.68)  | 0.023               |
| OS     | Objective strain (range 11-55)              | 35.03 (32.81: 37.20) | 35.91 (34.08:38.01)  | -0.54 (-3.78, 2.70) | 0.744               |
| SIS    | Subjective Internalised strain (range 6-35) | 22.47 (21.21:23.60)  | 23.63 (22.89:25.03)  | -0.81 (-2.63, 1.00) | 0.380               |
| SES    | Subjective Externalised strain (range 4-20) | 7.74 (7.01: 8.46)    | 7.88 (7.28:8.49)     | -0.34 (-1.37, .69)  | 0.522               |

\*Adjusted for gender, age, location, education

- 1. There was a lesser albeit significant effect of having a dog for parents/guardians whose children attend a special school for children with ASD
- 2. There is no significant difference in ratings of parents/guardians who have a child in a main stream primary school (p=0.09)

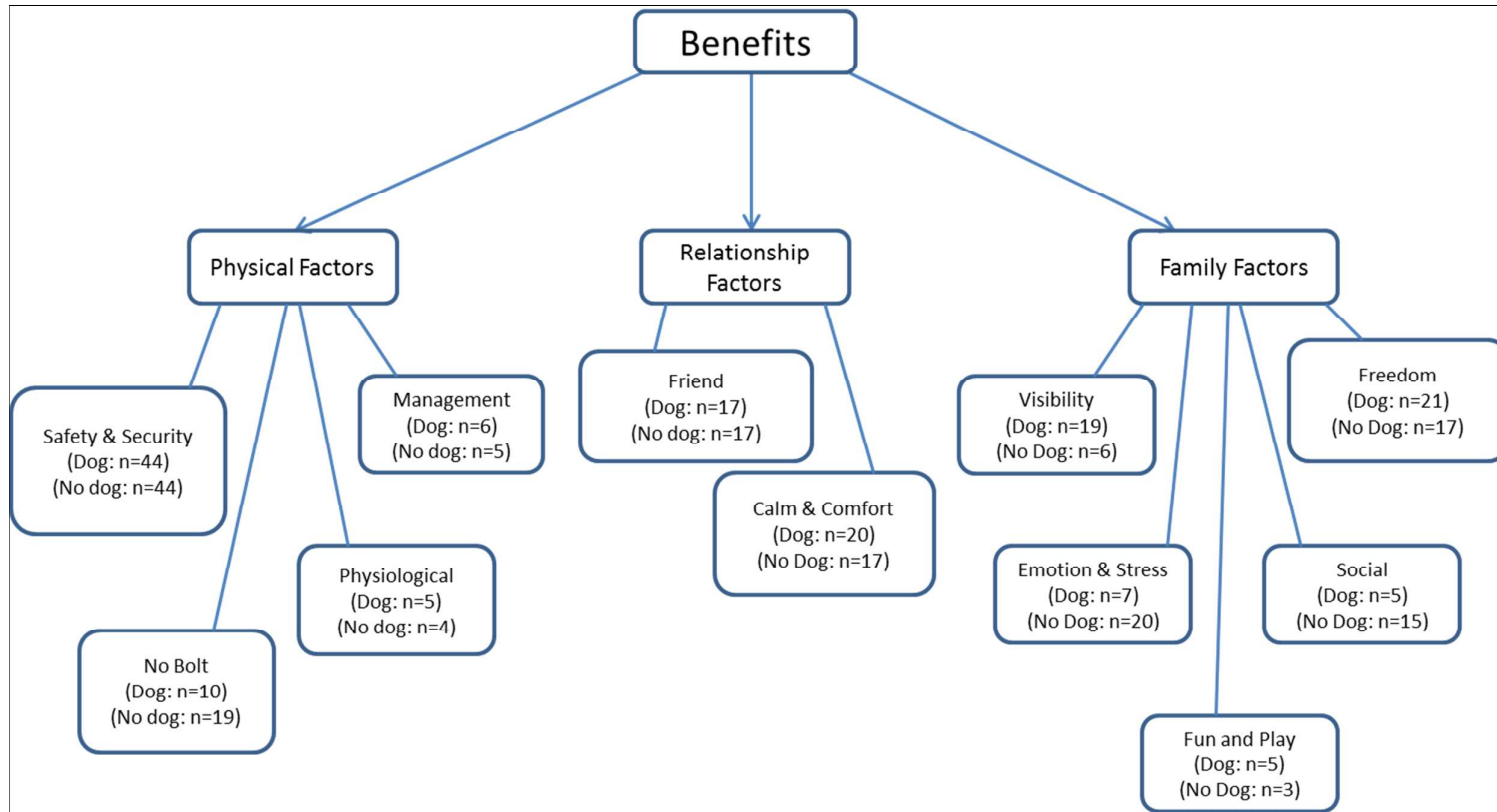

Figure 1 – Benefits of having an assistance dog (themes and categories)

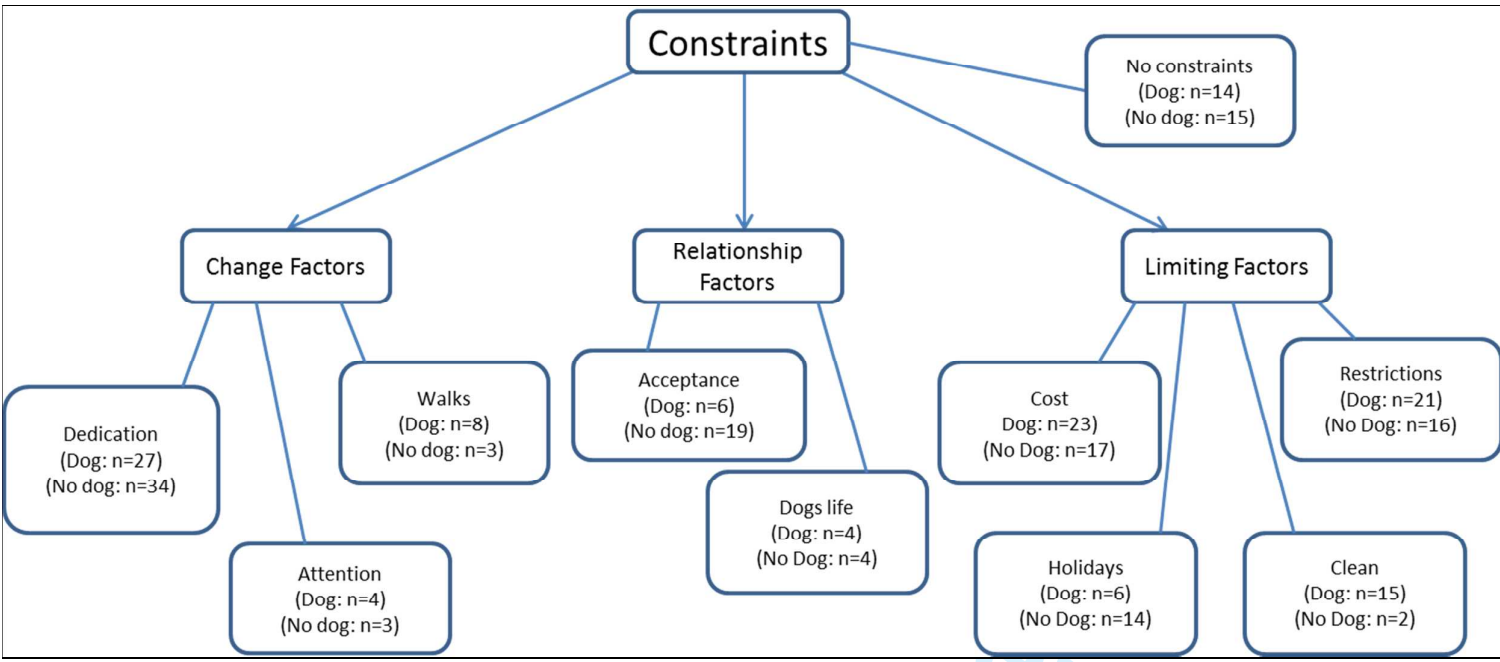

Figure 2 – Constraints of having an assistance dog (themes and categories)

ew only

1  
2  
3  
4  
5  
6  
7  
8  
9  
10  
11  
12  
13  
14  
15  
16  
17  
18  
19  
20  
21  
22  
23  
24  
25  
26  
27  
28  
29  
30  
31  
32  
33  
34  
35  
36  
37  
38  
39  
40  
41  
42  
43  
44  
45  
46  
47  
48  
49

STROBE Statement—parents perspectives on the value of assistance dogs for children with autism spectrum disorder: a cross sectional study.

|                              | Item No | Recommendation                                                                                                                                                                                                                                                                                                                                                                                                                                                        |
|------------------------------|---------|-----------------------------------------------------------------------------------------------------------------------------------------------------------------------------------------------------------------------------------------------------------------------------------------------------------------------------------------------------------------------------------------------------------------------------------------------------------------------|
| <b>Title and abstract</b>    | 1       | (a) We have indicated the study's design with a commonly used term in the title<br>(b) We have provided in the abstract an informative and balanced summary of what was done and what was found                                                                                                                                                                                                                                                                       |
| <b>Introduction</b>          |         |                                                                                                                                                                                                                                                                                                                                                                                                                                                                       |
| Background/rationale         | 2       | We have explained the scientific background and rationale for the investigation being reported                                                                                                                                                                                                                                                                                                                                                                        |
| Objectives                   | 3       | Specific objectives, including any prespecified hypotheses are stated at end of the introduction                                                                                                                                                                                                                                                                                                                                                                      |
| <b>Methods</b>               |         |                                                                                                                                                                                                                                                                                                                                                                                                                                                                       |
| Study design                 | 4       | We have presented key elements of study design early in the paper – details given in Methods section and at end of Introduction.                                                                                                                                                                                                                                                                                                                                      |
| Setting                      | 5       | We have described the setting, locations, and relevant dates, including periods of recruitment, exposure, follow-up, and data collection                                                                                                                                                                                                                                                                                                                              |
| Participants                 | 6       | <i>Cross-sectional study</i> —We have given the eligibility criteria, and the sources and methods of selection of participants                                                                                                                                                                                                                                                                                                                                        |
| Variables                    | 7       | We have clearly defined all outcomes, exposures, predictors, potential confounders, and effect modifiers.                                                                                                                                                                                                                                                                                                                                                             |
| Data sources/<br>measurement | 8*      | We have provided full descriptions of our measures and assessments in the methods section                                                                                                                                                                                                                                                                                                                                                                             |
| Bias                         | 9       | We have addressed biases in our procedures section and in our regression analysis - adjusting for key demographic variables.                                                                                                                                                                                                                                                                                                                                          |
| Study size                   | 10      | We sampled the total population of users of a national assistance dog's organisation. Explained in Methods section.                                                                                                                                                                                                                                                                                                                                                   |
| Quantitative variables       | 11      | Data management techniques are described in the data analysis section at end of the Methods.                                                                                                                                                                                                                                                                                                                                                                          |
| Statistical methods          | 12      | (a) We have described all statistical methods, including those used to control for confounding – in the Methods section.<br>(b) We have described methods used to examine subgroups and interactions in the Results section.<br>(c) We had minimal missing data.<br><i>Cross-sectional study</i> —we used data analysis techniques appropriate for comparing two independent groups.<br>(e) Describe any sensitivity analyses – we did not do a sensitivity analysis. |

Continued on next page

**Results**

|                  |     |                                                                                                                                                                                                                                                                                                                                                                                                                                                                                      |
|------------------|-----|--------------------------------------------------------------------------------------------------------------------------------------------------------------------------------------------------------------------------------------------------------------------------------------------------------------------------------------------------------------------------------------------------------------------------------------------------------------------------------------|
| Participants     | 13* | (a) We have reported numbers of individuals in our cross sectional study—eg numbers potentially eligible, examined for eligibility, confirmed eligible, included in the study, and analysed<br>(b) We omitted the over tens from our analysis for this study – described in Results section.<br>(c) We have the maximum of 5 tables and figures included – these were considered essential and so we do not have space for a flow diagram. We are happy to provide one if requested. |
| Descriptive data | 14* | (a) We have given characteristics of the study participants (eg demographic, clinical, social) and information on exposures and potential confounders (start of Results section)<br>(b) We had minimal missing data.                                                                                                                                                                                                                                                                 |
| Outcome data     | 15* | <i>Cross-sectional study</i> —We have reported the numbers of outcome events or summary measures in the Results section.                                                                                                                                                                                                                                                                                                                                                             |
| Main results     | 16  | (a) We have given unadjusted and adjusted means and 95% confidence intervals. We have explained the reasons for adjustment in the results section.<br>(b) We did not categorise continuous variables.<br>(c) If relevant, consider translating estimates of relative risk into absolute risk for a meaningful time period – this was not relevant.                                                                                                                                   |
| Other analyses   | 17  | Report other analyses done—eg analyses of subgroups and interactions – main interactions are reported in the Results section and in the Discussion.                                                                                                                                                                                                                                                                                                                                  |

**Discussion**

|                  |    |                                                                                                                                                                                     |
|------------------|----|-------------------------------------------------------------------------------------------------------------------------------------------------------------------------------------|
| Key results      | 18 | We have summarised key results with reference to study objectives                                                                                                                   |
| Limitations      | 19 | We have discussed limitations of the study, taking into account sources of potential bias or imprecision.                                                                           |
| Interpretation   | 20 | We have given a cautious overall interpretation of results considering objectives, limitations, multiplicity of analyses, results from similar studies, and other relevant evidence |
| Generalisability | 21 | We have discussed the generalisability (external validity) of the study results at the end of the Discussion.                                                                       |

**Other information**

|         |    |                                                                                                                                                                                                                                                                                                                 |
|---------|----|-----------------------------------------------------------------------------------------------------------------------------------------------------------------------------------------------------------------------------------------------------------------------------------------------------------------|
| Funding | 22 | This study was not funded from any particular source. It was done at University College Cork and by kind permission of the Irish Guide Dogs for the Blind. They assisted us in contacting their service users. We did not have access to their service users lists. They did not have access to the study data. |
|---------|----|-----------------------------------------------------------------------------------------------------------------------------------------------------------------------------------------------------------------------------------------------------------------------------------------------------------------|

\*Give information separately for cases and controls in case-control studies and, if applicable, for exposed and unexposed groups in cohort and cross-sectional studies.

**Note:** An Explanation and Elaboration article discusses each checklist item and gives methodological background and published examples of transparent reporting. The STROBE checklist is best used in conjunction with this article (freely available on the Web sites of PLoS Medicine at <http://www.plosmedicine.org/>, Annals of Internal Medicine at <http://www.annals.org/>, and Epidemiology at <http://www.epidem.com/>). Information on the STROBE Initiative is available at [www.strobe-statement.org](http://www.strobe-statement.org).

# BMJ Open

## Parents' perspectives on the value of assistance dogs for children with autism spectrum disorder: a cross sectional study

|                                 |                                                                                                                                                                                                                                                                                                                 |
|---------------------------------|-----------------------------------------------------------------------------------------------------------------------------------------------------------------------------------------------------------------------------------------------------------------------------------------------------------------|
| Journal:                        | <i>BMJ Open</i>                                                                                                                                                                                                                                                                                                 |
| Manuscript ID:                  | bmjopen-2014-004786.R1                                                                                                                                                                                                                                                                                          |
| Article Type:                   | Research                                                                                                                                                                                                                                                                                                        |
| Date Submitted by the Author:   | 16-Apr-2014                                                                                                                                                                                                                                                                                                     |
| Complete List of Authors:       | Burgoyne, Louise; University College Cork, Dowling, Lisa; University College Cork, School of Medicine Fitzgerald, Anthony; University College Cork, Epidemiology Connolly, Micaela; Brothers of Charity, Browne, John; University College Cork, Epidemiology Perry, Ivan; University College Cork, Epidemiology |
| <b>Primary Subject Heading</b>: | Public health                                                                                                                                                                                                                                                                                                   |
| Secondary Subject Heading:      | Epidemiology, Health services research, Public health                                                                                                                                                                                                                                                           |
| Keywords:                       | EPIDEMIOLGY, PUBLIC HEALTH, PRIMARY CARE                                                                                                                                                                                                                                                                        |
|                                 |                                                                                                                                                                                                                                                                                                                 |

SCHOLARONE™  
Manuscripts

1  
2  
3  
4  
5  
6  
7  
8 **Parents' perspectives on the value of assistance dogs for children with autism**  
9 **spectrum disorder: a cross sectional study**  
10

11  
12  
13  
14  
15 **Corresponding Author: Louise Burgoyne,**

16 **Institution: Department of Epidemiology & Public Health, University College Cork (UCC).**

17 **Contact: [l.burgoyne@ucc.ie](mailto:l.burgoyne@ucc.ie), ph.: 00-353-4205517, fax: 00-353-214205469.**  
18  
19  
20

21  
22 **Co-authors**

23 **Lisa Dowling, Final Year Medical Student, School of Medicine, UCC**

24 **Anthony Fitzgerald, Biostatistician, Department of Epidemiology & Public Health, UCC**

25 **Micaela Connolly, Psychologist, Brothers of Charity, Cork.**

26 **John Browne, Professor, Department of Epidemiology & Public Health, UCC**

27 **Ivan J Perry, Professor & Head of Department of Epidemiology & Public Health, UCC.**  
28  
29  
30  
31  
32  
33  
34

35 **Key Words**

36 **Public Health, Epidemiology, Autism Spectrum Disorders, Assistance Dogs, animal assisted**  
37 **interventions.**

38 **Word Count Revised Document:**

39 **Abstract = 304 words**

40 **Revised document = 5,027 words (excluding title page, references, tables,**  
41 **figures and bullet pointed strengths and weaknesses)**  
42  
43  
44  
45  
46  
47  
48  
49

50 This research received no specific grant from any funding agency in the public, commercial  
51 or not for profit sector. Technical appendix, statistical code, and dataset available from the  
52 corresponding author at University College Cork, who will provide a permanent home for  
53 the dataset.  
54  
55  
56  
57  
58  
59  
60



### Main Strengths and Limitations of this study

- This study is the first to capture the views of a large group of parents/guardians on an assistance dog intervention.
- Findings suggest that parents perceive a high value in dogs for promoting safety, security and positive public reception for children with ASD.
- This study assessed the perceptions of parents/guardians on the wait list for a dog as opposed to using a stronger randomised control trial (RCT) design, where controls are randomly assigned to another intervention.

### Introduction

There is an expanding literature indicating the human mental and physical health benefits derived from interaction with companion animals.<sup>1</sup> The presence of animals as an intervention tool was first studied by psychotherapist Boris Levinson via a series of case studies.<sup>2</sup> At the time animals were seen as inferior replacements for human social interactions.<sup>3</sup> Since the 1970's animals have been used as a means of improving human physical, emotional, cognitive and social functioning. Animal assisted interventions (AAI) are classified into three groupings; animal assisted activities (AAA), animal assisted therapies (AAT) and service animal programmes (SAP).<sup>4</sup>

Animal assisted activities are delivered by trained personnel in environments such as hospitals and educational settings with an emphasis on quality of life enhancement via recreation and education e.g., therapeutic horse riding to treat populations with physical and mental disabilities.<sup>5-6</sup> Animal assisted therapies are practiced by professionals with

1  
2  
3 individualised therapy goals.<sup>7</sup> The emphasis is on improvements in physical, social and  
4  
5 cognitive functioning e.g., an occupational therapist working to facilitate fine motor skills  
6  
7 development in a child via a series of structured tasks such as grooming and feeding a cat.  
8  
9  
10 A meta-analysis of the literature on AAT has shown that they are associated with moderate  
11  
12 effect sizes in improving outcomes in four areas: autism spectrum symptoms, medical  
13  
14 difficulties, behavioural problems, and emotional well-being.<sup>8</sup> A recent systematic review of  
15  
16 the literature on AAI for ASD has indicated preliminary 'proof of concept', but highlights the  
17  
18 needs for more rigorous research to establish a convincing evidence base.<sup>9</sup> This view is  
19  
20 upheld by another recent review pointing to the need for better research designs and larger  
21  
22 sample sizes.<sup>10</sup>  
23  
24  
25  
26  
27  
28

29 Service animal interventions (SAP) use dogs to assist people with a disability in performing  
30  
31 daily activities. Service dogs live in-house with the people they work with. Of late  
32  
33 assistance dogs have received growing attention as a means of aiding children with Autism  
34  
35 Spectrum Disorder (ASD) . Qualitative inquiry on the integration of assistance dogs into ten  
36  
37 families with a child who has ASD, showed that the presence of a dog can improve quality of  
38  
39 life for children and parents.<sup>11</sup> A study examining risks and benefits of assistance dogs using  
40  
41 a series of structured interviews with 17 families, reported social and cognitive benefits in  
42  
43 addition to physical and medical benefits.<sup>12</sup> An experimental study which assessed the  
44  
45 effects of assistance dogs on basal salivary cortisol secretion of 42 children with ASD,  
46  
47 demonstrated a reduction in the cortisol awakening response and the number of disruptive  
48  
49 behavioural incidents post introduction of the dog.<sup>13</sup> Assistance dogs complete a unique  
50  
51 triad between parent/guardian and child. Typically the child is attached to the dog via a  
52  
53 lead (leash) and belt. The dog walks with the child but takes commands from the parent  
54  
55  
56  
57  
58  
59  
60

1  
2  
3 (handler).<sup>14</sup> If the child tries to step off a footpath or attempts to bolt, the dog will use all  
4  
5 his/her power to slow the child down. Assistance dogs prohibit dangerous behaviour such  
6  
7 as elopement (bolting) and provide a calming presence.  
8  
9

10  
11  
12 Elopement or the tendency to 'bolt' is characteristic of ASD. Such behaviour can result in a  
13  
14 child's exposure to dangerous traffic situations or encounters with strangers.<sup>15</sup> Despite  
15  
16 reports of higher mortality rates in ASD populations owing to accidents such as suffocation,  
17  
18 drowning and injuries, research on elopement behaviour is sparse.<sup>16-18</sup> If left untreated  
19  
20 elopement may result in the need for a child to be moved to a restrictive setting.<sup>19</sup> In a  
21  
22 systematic review of the literature on current elopement treatments such as function based  
23  
24 interventions, Lang and colleagues conveyed that just two of ten studies examined reported  
25  
26 complete elimination of elopement.<sup>20</sup> Treatments that effectively eliminate elopement  
27  
28 behaviours are warranted.  
29  
30  
31  
32  
33

34  
35  
36 Social, emotional and behavioural challenges at home and in public mean that  
37  
38 parents/guardians of children with ASD experience stress in most areas of their lives.<sup>21-24</sup> In  
39  
40 addition to behaviours such as elopement, public tantrums and the reaction from others are  
41  
42 regarded as being some of the more difficult aspects of a child with ASD's behaviour.  
43  
44 Situations can leave parents/guardians feeling judged as 'bad' parents, or feeling like a  
45  
46 failure.<sup>25</sup> In this context assistance dogs can provide a unique support by facilitating child  
47  
48 safety and promoting positive public reception. Outings to public places can become less  
49  
50 stressful and families can enjoy greater freedom and mobility. Given the resource  
51  
52 implications of assistance dog interventions for ASD, there is a need to assess the value of  
53  
54 acceptability and likely uptake of services.  
55  
56  
57  
58  
59  
60

1  
2  
3  
4  
5  
6  
7  
8  
9  
10  
11  
12  
13  
14  
15  
16  
17  
18  
19  
20  
21  
22  
23  
24  
25  
26  
27  
28  
29  
30  
31  
32  
33  
34  
35  
36  
37  
38  
39  
40  
41  
42  
43  
44  
45  
46  
47  
48  
49  
50  
51  
52  
53  
54  
55  
56  
57  
58  
59  
60

Currently there are 188 service animal interventions registered with the standards body Assistance Dogs International (ADI). These interventions include guide dogs for the blind, hearing dogs for the hard of hearing, and service dogs for people with other disabilities including ASD. In this study we measured parents/guardians ratings on: (a) the impact of having an assistance dog on child safety from environmental hazards, (b) public acceptance and awareness of ASD, (c) sense of competence with managing a child with ASD and (d) levels of caregiver strain. We also obtained parents/guardians views on the primary benefits and constraints of having an assistance dog.

## Methods

### Study Design and Participants

Our study was based in the primary care setting, within the context of a specific national assistance dog intervention in the Republic of Ireland. All children who receive an assistance dog from this centre have been formally diagnosed with ASD via the Irish Health Services Executive (HSE) using standard tools such as the ADOS (Autism Diagnostic Observation Schedule), the ADI-R (Autism Diagnostic Interview) and the DISCO (Diagnostic Interview for Social Communication). Parents/guardians with an assistance dog (N=205) and parents/guardians on the waiting list for an assistance dog (N=107) were eligible to take part in the study. Expedited ethical approval was granted from the Clinical Research Ethics Committee of the Cork Teaching Hospitals. Data were gathered between October 2012 and March 2013.

### Measures

1  
2  
3 Parents/guardians were asked to complete a four part questionnaire (Table 1). Part one  
4  
5 examined child demographics. Part two measured parents/guardians sense of competence  
6  
7 for managing a child with ASD using Perceived Competence Scales (PCS)<sup>26</sup> ( $\alpha = 0.876$ , 7  
8  
9 point scales: low-high competence). The PCS is a measure of one of three fundamental  
10  
11 psychological needs within Self Determination Theory.<sup>27-28</sup> Like other measures within  
12  
13 behavioural change theory, items on the PCS are typically written to be specific to the  
14  
15 relevant behaviour or domain being examined. A sample item from the PCS we used for this  
16  
17 study is 'I am able to do my own routine caring for my child with autism'. Part two also  
18  
19 assessed levels of strain using the Caregiver Strain Questionnaire CGSQ<sup>29</sup> ( $\alpha = 0.940$ , 5 point  
20  
21 scales: low-high strain), which has been validated to assess burden among caregivers of  
22  
23 children with autism.<sup>30</sup> The CGSQ asked participants to consider the past 6 months in terms  
24  
25 of the problems presented by items such as: 'interruption of personal time resulting from  
26  
27 your child's emotional or behavioural problem (Objective Strain)', 'how embarrassed did  
28  
29 you feel about your child's emotional or behavioural problem (Subjective Externalised  
30  
31 Strain)' and 'How worried did you feel about your child's future (Subjective Internalised  
32  
33 Strain)'.  
34  
35  
36  
37  
38  
39  
40  
41  
42

43 Part three of the questionnaire examined perceptions of child safety from environmental  
44  
45 hazards such as traffic, dangerous materials and outdoor spaces ( $\alpha=0.928$ , 7 point scales:  
46  
47 low-high safety/security). Participants were asked to rate how strongly they agreed or  
48  
49 disagreed with respect to their child's safety and security over the past 3 months e.g., 'I am  
50  
51 confident that my child with autism is secure from environmental hazards when we go on  
52  
53 walks in our neighbourhood.' Part three also assessed parents/guardians ratings on the  
54  
55 general public's acceptance of their child ( $\alpha=0.940$ , 7 point scales: low-high acceptance). In  
56  
57  
58  
59  
60

1  
2  
3 this case participants were asked to rate the public's perception of their child over the past  
4  
5 three months on items such as 'I am sure that people make allowances for my child with  
6  
7 autism when we are in a restaurant'. Scales for part three were developed with reference  
8  
9 to the format and structure of the Neighbourhood Environment Walkability Scale – Youth,<sup>31</sup>  
10  
11 and via consultation with parents and author MC, who is a psychologist specialising in  
12  
13 children with ASD. Part four asked participants to list their views of the main  
14  
15 benefits/constraints of having an assistance dog via 'free text'. Those on the waiting list  
16  
17 were asked to give the benefits/constraints that they feel a dog will bring.  
18  
19  
20  
21  
22  
23

#### 24 **Pilot**

25  
26 We piloted the questionnaire with eight parents/guardians, four of which have an assistance  
27  
28 dog and four who are on the waiting list. Minor modifications were made to the final  
29  
30 questionnaire on the basis of their responses.  
31  
32  
33  
34  
35

#### 36 **Procedures**

37  
38 The primary caregiver from each family with an assistance dog, and each family on the  
39  
40 waiting list received a postal questionnaire from the contact person at the assistance dog  
41  
42 centre. In the interests of confidentiality, the researchers at University College Cork did not  
43  
44 have access to names and addresses of participants. The assistance dog's centre did not  
45  
46 have access to the completed questionnaires. Each questionnaire pack contained a consent  
47  
48 form with study details, a questionnaire, a stamped addressed envelope, and an envelope  
49  
50 marked 'Research'. Participants were requested to place completed questionnaires in the  
51  
52 envelope marked 'Research' and to seal it. They were asked to place the sealed envelope  
53  
54 together with the signed consent form in the stamped addressed envelope, and to post  
55  
56  
57  
58  
59  
60

1  
2  
3 back to the assistance dog centre. Participants were assured that participation in the study  
4  
5 would have no impact on their status with the centre, and that staff at the centre would  
6  
7 have no access to the survey data.  
8  
9

## 10 11 12 **Data Analysis**

13  
14  
15  
16  
17 Descriptive statistics are reported using frequencies tables. Chi Square tests were used to  
18  
19 test for differences between the categorical demographic variables. T-tests were used to  
20  
21 examine differences between parents of children with an assistance dog and those waiting  
22  
23 to receive one, within the data on competence, caregiver strain (CGSQ), environmental  
24  
25 hazards and public awareness. We then fitted a linear regression that included having a dog  
26  
27 or being on the wait list as a dichotomous variable and each of gender, age, home location  
28  
29 and education as factors.  
30  
31  
32

33  
34  
35  
36 Qualitative data were analysed via open coding, followed by a process of categorisation  
37  
38 which facilitated the emergence of themes. Author LB analysed the qualitative data initially  
39  
40 and author LD completed a second analysis and cross check.  
41  
42  
43

## 44 45 **Results**

### 46 47 **Demographics**

48  
49  
50 A total of 134 parents/guardians with an assistance dog (65% response), and 87  
51  
52 parents/guardians from the wait list (81% response) completed the questionnaire. A large  
53  
54 proportion of participants with a dog have children over the age of ten (40%) compared to  
55  
56  
57  
58  
59  
60

1  
2  
3 just three participants from the wait list. For this reason we eliminated the 'over tens' from  
4  
5 further analysis in this paper.  
6  
7  
8  
9

10 A breakdown of the demographic characteristics of participants' children is in Table 2. A  
11  
12 majority are male (87.5% with dog; 91.7% waiting list) and similar percentages have other  
13  
14 medical conditions in addition to ASD (35% with dog; 32.1% wait list). Other conditions  
15  
16 include mild to moderate learning difficulties, ADHD, asthma and epilepsy. The largest  
17  
18 group live in suburban areas (41.3% with dog; 57% wait list) followed by the countryside  
19  
20 (45% with dog; 34% wait list). Over half of the children with a dog are verbal (52.5%) and  
21  
22 under half of those waiting for a dog are verbal (42%). There are differences in types of  
23  
24 school attended between participants whose children have an assistance dog and those  
25  
26 who do not yet have a dog. These are reflective of the remaining age differences between  
27  
28 the two groups post removal of the over tens from the total sample. The main difference is  
29  
30 that 61.3% of children with a dog attend a special school for ASD compared to 35.7% of the  
31  
32 wait list. Conversely 34.5% of children on the wait list are in a special class in primary school  
33  
34 compared to 21.3% who have a dog.  
35  
36  
37  
38  
39  
40  
41  
42

43 With regard to conventional interventions received there are some descriptive differences  
44  
45 between participants whose children have an assistance dog and those on the wait list for a  
46  
47 dog (Table 2). There is a less than 10% difference between the groups for regular speech  
48  
49 and language therapy (47.5% with dog; 38.1% wait list) and regular occupational therapy  
50  
51 (46.3% with dog; 38.1% wait list). Similar percentages from both groups have a resource  
52  
53 teacher (25% with dog; 26.2% wait list), and there is a 12% difference with regard to special  
54  
55 needs assistants (80% with dog; 67.9% wait list)  
56  
57  
58  
59  
60



1  
2  
3  
4  
5 There are significant differences between profiles of children who have a dog and children  
6 waiting for a dog with respect to age and schooling. There are no significant differences  
7  
8 between the groups for other conditions in addition to ASD, whether a child is verbal or  
9  
10 nonverbal, conventional interventions and home location.  
11  
12  
13

### 14 15 16 17 **Environmental Hazards & Public Awareness**

18  
19 The environmental hazards scales are summarized in Table 3. Ratings are from low  
20  
21 perceived safety to high safety. T-test results showed that mean ratings are significantly  
22  
23 higher ( $p < 0.001$ ) for parents/guardians whose children have a dog (32.43) than for those on  
24  
25 the waiting list (22.97). These differences remain significant after adjusting for gender, age,  
26  
27 home location and school type ( $p < 0.001$ ). We did however find a significant interaction  
28  
29 between school types and whether children have a dog. Although there are significant  
30  
31 differences between the rating of parents/guardians with a dog and those on the waiting list  
32  
33 for children attending a special school for autism (mean difference=6.62: 95%CI 0.639,  
34  
35 12.61), the effect is not as large as it is for children attending a primary school (mean  
36  
37 difference=12.53: 95%CI 4.16, 20.90) or a special class in a primary school (mean  
38  
39 difference=19.49: 5%CI 13.171, 25.821).  
40  
41  
42  
43  
44  
45  
46  
47

48 The range of scores from the public perception scales (Table 3) are from low to high, with  
49  
50 higher scores indicating a perception from parents/guardians that people act more  
51  
52 respectfully and responsibly towards children with ASD when in public settings. T test  
53  
54 results showed that parents/guardians mean ratings are significantly higher ( $p < 0.001$ ) for  
55  
56 those whose children have an assistance dog (15.87) than for the wait list (10.67). For the  
57  
58  
59  
60

1  
2  
3 most part these differences remain significant after adjusting for gender, age, home location  
4  
5 and education level ( $p < 0.001$ ). However, there was a significant interaction between type  
6  
7 of school attended and whether children have an assistance dog. Although there are  
8  
9 significant differences between the ratings of parents/guardians with a dog and those on  
10  
11 the waiting list where their children attend a special school for autism (mean  
12  
13 difference=6.65: 95%CI 3.79, 9.51), and a special class in primary school (mean  
14  
15 difference=7.01: 95%CI 2.88, 11.13), there is no significant difference in the ratings of  
16  
17 parents/guardians who have a child in a main stream primary school ( $p=0.09$ ).  
18  
19  
20  
21  
22  
23

#### 24 **Perceived Competence and Caregiver Strain**

25  
26 A summary of results from parents/guardians perceived competencies with regard to caring  
27  
28 for and managing their child with ASD are in Table 3. T-test results show that mean scores  
29  
30 for parents/guardians whose children have an assistance dog (19.75), are significantly higher  
31  
32 ( $p=0.02$ ) in terms of perceived competencies than those on the waiting list (17.91). This  
33  
34 difference remained significant after adjusting for gender, age, home location and education  
35  
36 level ( $p=0.02$ ). Results from the Caregiver Strain Questionnaire (CGSQ) (Table 3) show that  
37  
38 parents/guardians who have a dog rated slightly lower levels of strain than those on the  
39  
40 wait list. However we found no significant differences between the groups with regard to  
41  
42 any of the individual items on the scales, or the summarized scores for 'objective strain',  
43  
44 'subjective internalized strain', and 'subjective externalized strain'.  
45  
46  
47  
48  
49  
50  
51  
52  
53  
54

#### 55 **Benefits and Constraints**

1  
2  
3 Qualitative data were analysed using a thematic approach and constant comparison  
4  
5 techniques by authors LB and LD. Each participant response was reviewed and codes were  
6  
7 assigned to each 'segment of meaning'. Open codes were assigned to representative  
8  
9 categories. The process of coding and categorisation facilitated the emergence of themes  
10  
11 from within the data. Initial qualitative analysis was performed by LB, and these results  
12  
13 were cross-checked and refined by LD. We analysed the first and second listed benefits and  
14  
15 constraints of having an assistance dog. Data beyond the first two benefits and constraints  
16  
17 are sparse and not reported.  
18  
19  
20  
21

22  
23  
24 Three themes were identified under 'benefits'. These were; physical factors, relationship  
25  
26 factors and family factors (Figure 1). 'Physical factors' is divided into four categories and  
27  
28 focuses on how assistance dogs can keep a child safe whilst facilitating parents' ability to  
29  
30 manage: *"A sense of security & protection for our daughter especially walking in local*  
31  
32 *environments"* (parent of girl 7-9yo with a dog), *"(Dog) will stop child from bolting from*  
33  
34 *home"* (parent of boy 4-6yo on waiting list). For 3 out of 4 categories, this theme is evenly  
35  
36 dispersed between parents who have a dog and waiting list controls. For the fourth  
37  
38 category 'no bolt', more parents/guardians from the waiting list state the benefit of the dog  
39  
40 being able to stop the child from eloping. 'Relationship factors' is grouped into two  
41  
42 categories and centres on the direct positive relationship between the child with ASD and  
43  
44 his/her assistance dog: *"She is his very best friend"* (parent of boy 4-6yo with a dog), *"It*  
45  
46 *might calm him down instead of him head banging the windows"* (parent of boy 4-6yo on  
47  
48 *waiting list*). The categories making up this theme are almost evenly dispersed between  
49  
50 parents/guardians who have a dog and waiting list controls. 'Family factors' is split into five  
51  
52 categories and is about how day to day family and social life is affected by the introduction  
53  
54  
55  
56  
57  
58  
59  
60

1  
2  
3 of an assistance dog: *"Ability to do maybe ordinary things and go to ordinary places"* (parent  
4 of boy 7-9yo on waiting list), *"a sense of responsibility, for example he can feed the dog"*  
5  
6  
7  
8  
9  
10  
11 among parents/guardians with a dog and those on the waiting list. For example benefits  
12 listed by those with a dog formed more of the category 'visibility', which is about public  
13 reception and awareness of ASD. Benefits listed by parents/guardians on the waiting list  
14 formed more of the categories 'social' and 'emotion and stress'. 'Social' is about a child  
15 with ASD's sociability with family and outside the home. 'Emotion and stress' is about levels  
16 of emotion/stress in the family, and to a lesser extent the ability of the child to express  
17 emotion.  
18  
19  
20  
21  
22  
23  
24  
25  
26  
27  
28

29 Four themes emerged from the data on constraints. These were; 'change factors',  
30 'relationship factors', 'limiting factors' and 'no constraints' (Figure 2). Change factors has  
31 three categories and focuses on life style challenges that parents/guardians experience or  
32 anticipate experiencing when they have an assistance dog: *"Its' like an additional child in the*  
33 *family"*(parent of boy 4-6yo with a dog), *"To make time to go for walks everyday"* (parent of  
34 *boy 7-9yo on waiting list)*. The categories comprising this theme are quite evenly dispersed  
35 between parents/guardians of children with a dog and those on the waiting list. Slightly  
36 more parents/guardians waiting for a dog list 'dedication', which is the time and effort given  
37 to care for the dog as a main constraint. As with the benefits themes, 'relationship factors'  
38 is about the direct relationship between the child with ASD and the dog: *"My son may not*  
39 *connect with the dog"* (parent of boy 4-6yo on waiting list), *"my concern is when the dog has*  
40 *to retire, how will my child cope?"* (parent of boy 7-9yo with a dog). More  
41  
42  
43  
44  
45  
46  
47  
48  
49  
50  
51  
52  
53  
54  
55  
56  
57  
58  
59  
60  
61

1  
2  
3 concerned about how the dog will be accepted by the child and other family members. The  
4  
5 third theme 'limiting factors' has four associated categories and centres on day to day  
6  
7 constraints of having a dog on family life; *"Extra expense for food, vet bills etc"* (parent of  
8  
9 boy 7-9yo with a dog), *"it will be a bit difficult to travel"* (parent of boy 4-6yo on waiting list).  
10  
11  
12 There are large differences in the dispersal of two of the categories within this theme. In  
13  
14 particular, more parents/guardians whose children have a dog contributed to the category  
15  
16 'clean' , which is about day to day hygiene activities related to the dog e.g., dog hair in the  
17  
18 house and dealing with dog toileting. More parents/guardians on the waiting list  
19  
20 contributed to a category on 'holidays', which expressed concerns about going on holidays  
21  
22 with the dog. The final theme 'no constraints' has just one category. This was a category in  
23  
24 which parents/guardians stated no issues for concern or anticipated drawbacks; *"There are*  
25  
26 *none....our dog is a valuable and much loved addition to the family"* (parent of boy 7-9yo  
27  
28 *with a dog)*, *"don't anticipate any, feeling very positive about it"* (parent of boy 4-6yo on  
29  
30 *waiting list*). This category was almost evenly dispersed between parents whose children  
31  
32 have a dog and those on the waiting list.  
33  
34  
35  
36  
37  
38  
39  
40

## 41 Discussion

42  
43 Our study is the first to capture the views of a large group of parents/guardians on an  
44  
45 assistance dog intervention. Quantitative findings indicate the value of dogs in promoting  
46  
47 safety, security and positive public reception for children with ASD. They also suggest that  
48  
49 the presence of an assistance dog may make parents/guardians feel more competent with  
50  
51 managing their child. Qualitative findings indicate the role assistance dogs play in  
52  
53 promoting child safety, calmness and provision of friendship. They also highlight the role  
54  
55 the dog has in facilitating 'normal' family functioning, such as being able to visit a shopping  
56  
57  
58  
59  
60

1  
2  
3 centre. Constraints associated with having a dog relate to specific lifestyle changes  
4  
5 experienced by parents/guardians and the larger family group, such as dedicated care of the  
6  
7 dog.  
8  
9

10  
11  
12 There are several study limitations. Firstly, our findings are based on self-reports and  
13  
14 parents/guardians personal perceptions and are thus subject to participant overestimation,  
15  
16 recall bias and possible subject expectancy effects. Also since we did not include any  
17  
18 objective measures, we cannot know if parents perceptions reflect reality e.g., were  
19  
20 children actually safer and did the public actually view them more positively when  
21  
22 accompanied by an assistance dog. Secondly, there were differences in children's ages and  
23  
24 type of schools attended between our two sample groups which resulted in removal of the  
25  
26 over tens from our analyses and a reduction in sample size. Thirdly we did not assess the  
27  
28 views of parents/guardians who are not registered with the assistance dog centre. Our  
29  
30 results therefore can only be relevant to parents who are open to the possibility of having  
31  
32 an assistance dog. A fourth limitation of the study is that we assessed the perceptions of  
33  
34 waiting list controls as opposed to using a RCT design, where controls are randomly assigned  
35  
36 to another intervention. Ideally we would employ a planned activity, another animal such  
37  
38 as a cat, or a robotic dog as a control. Such a design was not feasible however and the  
39  
40 current data do provide insights.  
41  
42  
43  
44  
45  
46  
47  
48  
49

50 Recognition of the value animal interventions play in promoting human health is gaining  
51  
52 momentum. Animal interventions have been shown to produce increases in self-efficacy  
53  
54 and coping in psychiatric patients<sup>32-33</sup> promote recovery from ill health<sup>34, 3, 35</sup>, and improve  
55  
56 academic performance, adaptive functioning and behavioural/emotional problems with  
57  
58  
59  
60

1  
2  
3 special education adolescents.<sup>36</sup> Autism spectrum disorder is one of the areas within which  
4  
5 animal interventions have had most success.<sup>8</sup> This is particularly the case for assistance dog  
6  
7 interventions, since dogs not only provide a possible mechanism for promoting  
8  
9 improvements in social and behavioural functioning, they also play a part in control of  
10  
11 elopement and promotion of child safety. Once a child is attached to a dog via the leash  
12  
13 and belt system they cannot 'bolt'. In this study parents/guardians with a dog rated their  
14  
15 child as considerably more safe from environmental hazards than did waiting list controls.  
16  
17 We did find a reportable interaction between having an assistance dog, type of school  
18  
19 attended and parents/guardians ratings. This interaction indicated a lesser albeit significant  
20  
21 effect of having a dog for parents/guardians whose children attend a special school for ASD.  
22  
23 The smaller effect may be due to the specific care that children and families receive from  
24  
25 ASD schools. Currently there are no interventions that can successfully eliminate elopement  
26  
27 among children with ASD.<sup>20</sup> Our quantitative findings support the role of assistance dogs in  
28  
29 providing this service. Our qualitative findings provide additional validation with safety and  
30  
31 security being the most frequently stated benefit of having a dog.  
32  
33  
34  
35  
36  
37  
38  
39  
40

41 Behavioural, social and emotional difficulties that encompass the lives of children with ASD  
42  
43 can impact on parents/guardians wellbeing.<sup>21-22</sup> Our findings suggest that assistance dogs  
44  
45 can provide parents/guardians with a higher sense of competency with regard to managing  
46  
47 their child than waiting list controls. This result may reflect added supports dogs provide in  
48  
49 public settings. Indeed public tantrums and reactions from the public are regarded as one  
50  
51 of the more difficult aspects of a child with ASD's behaviour.<sup>25</sup> Qualitative results from this  
52  
53 study highlight the role that an assistance dog has in promoting public awareness and  
54  
55 acceptance of ASD. Quantitative results suggest that parents/guardians whose children  
56  
57  
58  
59  
60

1  
2  
3 have assistance dogs rate the public's perception of their child as more positive. Our  
4  
5 regression analysis did show an interaction between having an assistance dog and type of  
6  
7 school attended. On examination we found that whilst the ratings of parents/guardians  
8  
9 remained significantly different where their children attend a special school for autism or a  
10  
11 special class in primary school, they were not significantly so where children attend a main  
12  
13 stream primary school. Such a result may reflect a lack of awareness/acceptance of ASD in  
14  
15 main stream schools.  
16  
17  
18  
19  
20

21  
22 Our findings from the caregiver strain questionnaire (CSGQ) show no significant differences  
23  
24 between parents/guardians who have a child with a dog, and those waiting to receive a dog.  
25

26  
27 There are three sub scales within the CSGQ. 'Objective strain' deals with the caregiver  
28  
29 burden on day to day tasks related to care, 'subjective internalized strain' deals with  
30  
31 negative feelings internal to the caregiver, and 'subjective externalized strain' deals with  
32  
33 negative feelings by the caregiver towards the child. We considered two reasons which may  
34  
35 explain the lack of any real differences between the groups with regard to caregiver strain.  
36  
37

38  
39 Firstly, it is known that being a parent/guardian of a child with ASD can affect quality of life  
40  
41 with respect to levels of care and support required, and the resulting impacts on family  
42  
43 finance and family time.<sup>37-38</sup> In our study parents/guardians expressed that the dedication  
44  
45 required to care for a dog is a main constraint. Assistance dogs require feeding, exercise,  
46  
47 affection, grooming, regular company and financial expenditure. The added tasks of looking  
48  
49 after an assistance dog may not therefore impact positively upon levels of caregiver strain.  
50  
51

52  
53 Secondly, we noticed that our sample scores on the CSGQ were generally less positive than  
54  
55 scores from parents/guardians who took part in the most recent CSGQ validation study.<sup>30</sup>  
56

57  
58 This may reflect a lower provision of services for families of children with autism in the  
59  
60



1  
2  
3 Republic of Ireland. It is interesting to note that although there were no significant  
4  
5 differences between parents/guardians who have a dog and those on the wait list for a dog  
6  
7 with respect to caregiver strain, there were significant differences with respect to perceived  
8  
9 competence. Why do parents/guardians with a dog feel more competent but no less  
10  
11 strained? A possible explanation is that the process and actual event of getting an  
12  
13 assistance dog, and the specific procedures followed with respect to working with the dog,  
14  
15 may make parents/guardians feel more competent. Having a dog may add more structure  
16  
17 to parent's management technique without necessarily reducing levels of strain associated  
18  
19 with having a child with ASD.  
20  
21  
22  
23  
24  
25

26  
27 The ability of assistance dogs to provide a sense of calm and comfort for children with ASD is  
28  
29 documented.<sup>11,13</sup> Qualitative results from this study lend support to this view.  
30

31 Parents/guardians with an assistance dog frequently mentioned the dogs' ability to promote  
32  
33 calmness in their child. Those on the waiting list anticipated ways in which the dog would  
34  
35 aid their child in times of distress. Previous research has recognised the role that dogs have  
36  
37 in facilitating social development in children with ASD.<sup>12, 36 & 39</sup> Our qualitative findings  
38  
39 point to the idea that assistance dogs can act as a 'bridge' between children and the physical  
40  
41 and social environment. However, more parents/guardians on the waiting list for a dog  
42  
43 wrote about the anticipated ability of a dog to promote social development in their children  
44  
45 than those with a dog. Those with a dog wrote more about the increased public awareness  
46  
47 and acceptance of their child as a main benefit. It may be that although parents waiting for  
48  
49 a dog anticipate changes in social interaction, this does not emerge as the most important  
50  
51 benefit once they actually get a dog. That assistance dogs may facilitate social interaction in  
52  
53 children with ASD is not in dispute. However, this role may be more suited to animal  
54  
55  
56  
57  
58  
59  
60

1  
2  
3 assisted therapy (AAT), where a trained therapist may work with a dog to reach specific  
4  
5 cognitive or behavioural goals for a child. Parents/guardians listed constraints of having an  
6  
7 assistance dog were centred on the lifestyle changes. Such changes include the care and  
8  
9 costs required to ensure a dogs' health and wellbeing in addition to the restrictions  
10  
11 associated with the dogs' requirements for exercise and companionship. It is important to  
12  
13 recognise that each parent/guardian has a different level of tolerance for specific canine  
14  
15 behaviours.<sup>40</sup> Whilst many of the parents/guardians in our study discounted the constraints  
16  
17 of having a dog, some were explicit about their concerns. More of those with an assistance  
18  
19 dog expressed concern about the increase in housekeeping tasks, and specific hygiene  
20  
21 activities associated with having a dog in the family home. Parents/guardians with children  
22  
23 on the wait list were more concerned about whether the dog will be accepted by the child  
24  
25 and family, and logistics during family holiday time. Our results suggest that some of the  
26  
27 anticipated constraints do not necessarily emerge as the most important constraints once a  
28  
29 dog is placed in the home.  
30  
31  
32  
33  
34  
35  
36  
37

### 38 **Conclusions**

39  
40 Our findings indicate that parents/guardians perceive assistance dog interventions are  
41  
42 valuable in the treatment of ASD, particularly in relation to the control of elopement. They  
43  
44 also perceive that assistance dogs help to promote calmness and provide a source of  
45  
46 comfort for children.  
47  
48

### 49 **Funding Statement**

50  
51 This research received no specific grant from any funding agency in the public, commercial  
52  
53 or not for profit sectors.  
54  
55

### 56 **References**

- 1  
2  
3 1. O'Haire (2010) Companion animals and human health: Benefits, challenges and the road  
4 ahead. *Journal of Veterinary Behaviour* 5, 226-234.
- 5  
6  
7 2. Levinson (1969). *Pet-oriented Child Psychotherapy* Springfield Illinois, Charles C Thomas.
- 8  
9 3. Endenburg, N. and H. A. van Lith (2011). "The influence of animals on the development of  
10 children." *Vet J* 190(2): 208-214.
- 11  
12 4. Lasa, S. M., G. Ferriero, et al. (2011). "Animal-assisted interventions in internal and  
13 rehabilitation medicine: a review of the recent literature." *Panminerva Medica* 53(2): 129-  
14 136.
- 15  
16  
17 5. Bass, M., C. Duchowny, et al. (2009). "The Effect of Therapeutic Horseback Riding on  
18 Social Functioning in Children with Autism." *Journal of Autism and Developmental Disorders*  
19 39(9): 1261-1267.
- 20  
21  
22 6. Kern, J. K., C. L. Fletcher, et al. (2011). "Prospective Trial of Equine-assisted Activities in  
23 Autism Spectrum Disorder." *Alternative Therapies in Health and Medicine* 17(3): 14-20.
- 24  
25  
26 7. Parish-Plass, N. (2008). "Animal assisted therapy with children suffering from insecure  
27 attachment due to abuse and neglect: a method to lower the risk of intergenerational  
28 transmission of abuse?" *Clinical Child Psychology and Psychiatry* 13(2): 23.
- 29  
30  
31 8. Nimer, B. L. J. (2007). "Animal assisted therapy: a meta analysis." *Anthrozoos* 20: 13.
- 32  
33 9. O'Haire, M. E. (2013). Animal-assisted intervention for autism spectrum disorder: A  
34 systematic literature review. *Journal of Autism and Developmental Disorders* 43(7): 1606-  
35 1622
- 36  
37 10 Berry , A., Borgi, M., Francia., N., Alleva E., Cirulli, F (2012) Use of assistance and therapy  
38 dogs for children with autism spectrum disorders: A critical review of the current evidence. *J*  
39 *Altern Complement Med*, 19(2), 73-80.
- 40  
41  
42 11. Burrows, K. E., C. L. Adams, et al. (2008). "Sentinels of Safety: Service Dogs Ensure Safety  
43 and Enhance Freedom and Well-Being for Families With Autistic Children." *Qualitative*  
44 *Health Research* 18(12): 1642-1649.
- 45  
46  
47 12. Davis, B. W., K. Nattrass, et al. (2004). "Assistance dog placement in the pediatric  
48 population: Benefits, risks, and recommendations for future application." *Anthrozoos* 17(2):  
49 130-145.
- 50  
51  
52 13. Viau, R., G. Arsenault-Lapierre, et al. (2010). "Effect of service dogs on salivary cortisol  
53 secretion in autistic children." *Psychoneuroendocrinology* 35(8): 1187-1193.
- 54  
55  
56 14. Burrows, K. E., C. L. Adams, et al. (2008). "Factors affecting behavior and welfare of  
57 service dogs for children with autism spectrum disorder." *J Appl Anim Welf Sci* 11(1): 42-62.
- 58  
59  
60

15. Piazza, C. C., G. P. Hanley, et al. (1997). "Functional analysis and treatment of elopement." *J Appl Behav Anal* 30(4): 653-672.
16. Shavelle RM, Strauss DJ, Pickett J. Causes of death in autism. *J Autism Dev Disord*. 2001;31(6):569–576
17. McIlwain L, Fournier W. Wandering and autism: the need for data and resources. National Autism Association; 2010. Available at: [http://iacc.hhs.gov/events/2010/slides\\_fournier\\_mcilwain\\_102210.pdf](http://iacc.hhs.gov/events/2010/slides_fournier_mcilwain_102210.pdf).
- 18 Anderson, C., J. K. Law, et al. (2012). "Occurrence and family impact of elopement in children with autism spectrum disorders." *Pediatrics* 130(5): 870-877.
19. Perrin, C. (2008). "Brief functional analysis and treatment of elopement in preschoolers with autism." *Behavioural Interventions* 23: 8.
20. Lang, R., M. Rispoli, et al. (2009). "Treatment of elopement in individuals with developmental disabilities: a systematic review." *Res Dev Disabil* 30(4): 670-681.
21. Firth, I. and R. Dryer (2013). "The predictors of distress in parents of children with autism spectrum disorder." *J Intellect Dev Disabil* 38(2): 163-171.
22. Seymour M, Wood C, Giallo R, Jellett R J (2013) Fatigue, stress and coping in mothers of children with an autism spectrum disorder *Autism Dev Disord*. Jul;43(7):1547-54
23. de Andrés-García S, Sariñana-González P, Romero-Martínez A, Moya-Albiol L, Gonzalez-Bono E. (2013) Cortisol response to stress in caregivers of offspring with autism spectrum disorder is associated with care recipient characteristics. *Stress* 16(5): 510-9
24. Hayes SA, Watson SL. (2013) The impact of parenting stress: a meta-analysis of studies comparing the experience of parenting stress in parents of children with and without autism spectrum disorder. *J Autism Dev Disord* 43 (3): 629-42.
25. Ludlow, A., C. Skelly, et al. (2012). "Challenges faced by parents of children diagnosed with autism spectrum disorder." *J Health Psychol* 17(5): 702-711.
26. Williams, G. C., Freedman, Z.R., & Deci, E. L. (1998). Supporting autonomy to motivate glucose control in patients with diabetes. *Diabetes Care*, 21, 1644-1651
27. Deci, E. L., & Ryan, R. M. (1985). *Intrinsic motivation and self-determination in human behavior*. New York: Plenum.
28. Deci, E. L., & Ryan, R. M. (2000). The "what" and the "why" of goal pursuits: Human needs and the self-determination of behavior. *Psychological Inquiry*, 11, 227-268.

- 1  
2  
3 29. Brannan AM, Heflinger CA and Bickman L (1997) The caregiver strain questionnaire:  
4 measuring the impact on the family of living with a child with serious emotional problems,  
5 *Journal of Emotional and Behavioural Disorders* 5(4): 212-222.  
6  
7  
8 30. Khanna R, Madhavan S, Smith MJ, Tworek C, Patrick JH, Becker-Cottrill B. (2011)  
9 Psychometric properties of the Caregiver Strain Questionnaire (CGSQ) among caregivers of  
10 children with autism. *Autism*. 16 (2), 179-99.  
11  
12 31. Rosenberg D, Ding D, Sallis JF, Kerr J, Norman GJ, Durant N, Harris SK, Saelens BE (2009)  
13 Neighborhood Environment Walkability Scale for Youth (NEWS-Y): reliability and  
14 relationship with physical activity. *Prev Med*. 49(2-3):213-8.  
15  
16  
17 32. Berget B, Ekeberg O, Braastad B (2008) Animal assisted therapy with farm animals for  
18 persons with psychiatric disorders: effects on self efficacy, coping ability and quality of life, a  
19 randomised controlled trial. *Clin Pract Epidemiol Ment Health*, 4: 9.  
20  
21  
22 33. Bizub AL, Joy A, Davidson L. (2003) "It's like being in another world": demonstrating the  
23 benefits of therapeutic horseback riding for individuals with psychiatric disability. *Psychiatr*  
24 *Rehabil J*. 2003 Spring;26(4):377-84.  
25  
26  
27 34. Friedmann, E., & Thomas, S. A. (1995). Pet ownership, social support, and one year  
28 survival after acute myocardial infarction in the cardiac arrhythmia suppression trial (CAST).  
29 *American Journal of Cardiology*, 76, 1213–1217.  
30  
31 35. Morrison, M. L. (2007). Health benefits of animal-assisted interventions. *Complementary*  
32 *Health Practice Review*, 12(1), 51–62.  
33  
34  
35 36. Katcher, A H & Teumer, S P (2006). A four year trial of animal assisted therapy with  
36 public school special education students.. *Handbook on animal assisted therapy: theoretical*  
37 *foundations and guidelines*. Aubrey fine (2<sup>nd</sup> ed) Academic Press San diego.  
38  
39  
40 37. Jarbrink K (2008) The economic consequences of autistic spectrum disorder among  
41 children in a Swedish municipality. *Autism Vol* 11(5) 453–463  
42  
43 38. Cassidy A, McConkey R, Truesdale-Kennedy M and Slevin E Preschoolers with autism  
44 spectrum disorders: the impact on families and the supports available to them. *Early Child*  
45 *Development and Care Vol* 178(2),115–128  
46  
47  
48 39. Solomon O, 2010 What a dog can do: children with autism and therapy dogs in social  
49 interaction. *Journal of the society for psychological anthropology*. 38: 1 143-166.  
50  
51 40. Sanders C R (2004). Excusing tactics: social responses to the public misbehaviour of  
52 companion animals. *Anthrozoos*, 4, 82-90.  
53  
54  
55  
56  
57  
58  
59  
60

Table 1 Questionnaire subsections, details and measures.

| Section                                   | Details                                                                                                                                                                                                                                                                                                                                                                           | Measure                                                                                                                |
|-------------------------------------------|-----------------------------------------------------------------------------------------------------------------------------------------------------------------------------------------------------------------------------------------------------------------------------------------------------------------------------------------------------------------------------------|------------------------------------------------------------------------------------------------------------------------|
| <b>Part 1. Demographics</b>               | <ol style="list-style-type: none"> <li>Gender, age, other medical conditions, age of diagnosis, home location.</li> <li>Education, learning level, verbal/non verbal Interventions and therapies received</li> </ol>                                                                                                                                                              | Tick boxes, yes/no options, free text.                                                                                 |
| <b>Part 2. Parenting &amp; Autism</b>     | <ol style="list-style-type: none"> <li>Perceived competence<br/>From: Self Determination Theory<br/><i>Deci &amp; Ryan (1985 &amp; 2000)</i></li> <li>Caregiver strain questionnaire<br/>From: <i>Brannan et al (1997) &amp; Khanna et al., (2011)</i><br/><i>Objective strain</i><br/><i>Subjective internalised strain</i><br/><i>Subjective externalised strain</i></li> </ol> | <p>Four items on a 7-point scale</p> <p>21 items on a 5 point scale.</p> <p>11 items</p> <p>6 items</p> <p>4 items</p> |
| <b>Part 3. Environment &amp; Public</b>   | <ol style="list-style-type: none"> <li>Environment safety and security<br/>Adapted from scale structures:<br/><i>Rosenberg et al., (2009)</i></li> <li>Public Perception</li> </ol>                                                                                                                                                                                               | <p>Eight items on a 7-point scale.</p> <p>Four items on a 7-point scale.</p>                                           |
| <b>Part 4. Benefits &amp; constraints</b> | <ol style="list-style-type: none"> <li>Benefits of having an assistance dog</li> <li>Constraints of having an assistance dog</li> </ol>                                                                                                                                                                                                                                           | Free text.                                                                                                             |

1  
2  
3  
4  
5  
6  
7  
8  
9  
10  
11  
12  
13  
14  
15  
16  
17  
18  
19  
20  
21  
22  
23  
24  
25  
26  
27  
28  
29  
30  
31  
32  
33  
34  
35  
36  
37  
38  
39  
40  
41  
42  
43  
44  
45  
46  
47  
48  
49

For peer review only

Table 2 Participant Characteristics (With Dog n=80, Waiting list for Dog n=84)

| <i>Characteristics</i>  |                         | <i>With Dog<br/>N (%)</i> | <i>Waiting for Dog<br/>N (%)</i> | <i>P-value</i> |
|-------------------------|-------------------------|---------------------------|----------------------------------|----------------|
| <b>Gender</b>           | Male                    | 70 (87.5)                 | 77 (91.7)                        | *              |
| <b>Age</b>              | 0-6 years               | 30 (37.5)                 | 60 (71.4)                        | <0.001         |
|                         | 7-9 years               | 50 (62.5)                 | 24 (28.6)                        |                |
| <b>Location</b>         | Town/city centre        | 11 (13.8)                 | 8 (9.0)                          | 0.217          |
|                         | Suburb                  | 33 (41.3)                 | 47 (57.0)                        |                |
|                         | Countryside             | 36 (45.0)                 | 28 (34.0)                        |                |
| <b>Other conditions</b> | Yes                     | 24 (30.0)                 | 27 (32.1)                        | 0.767          |
| <b>Verbal</b>           | Yes                     | 42 (52.5)                 | 35 (42.0)                        | 0.165          |
| <b>Education</b>        | Preschool               | 0                         | 10 (11.9)                        | *              |
|                         | Home tuition            | 1 (1.0)                   | 4 (5.0)                          | *              |
|                         | Primary                 | 13 (16.3)                 | 11 (31.1)                        | 0.025          |
|                         | Special class (Primary) | 17 (21.3)                 | 29 (34.5)                        |                |
|                         | Special school (ASD)    | 49 (61.3)                 | 30 (35.7)                        |                |
| <b>Interventions</b>    | Speech and Language     | 38 (47.5)                 | 32 (38.1)                        | 0.224          |
|                         | Occupational Therapy    | 37 (46.3)                 | 32 (38.1)                        | 0.290          |
|                         | Resource Teacher        | 20 (25.0)                 | 22 (26.2)                        | 0.861          |
|                         | Special Needs Assistant | 64 (80.0)                 | 57 (67.9)                        | 0.077          |

P-values are from valid chi-square tests. \*not included in chi-square analysis – numbers do not meet minimum expected count.



Table 3. Summary of results from Environmental Hazards, Public Awareness, Competence and Caregiver Strain scales.

| Item   | Description                                 | Mean (95%CI)         |                      |                     | P-value             |
|--------|---------------------------------------------|----------------------|----------------------|---------------------|---------------------|
|        |                                             | With Dog (n=80)      | Waiting Dog (n=84)   | Diff* (95% CI)      |                     |
| HAZ    | Environmental Hazards (range 8 -56)         | 32.43 (29.47: 35.39) | 22.97 (20.83: 25.11) | 10.9 (6.97, 14.89)  | <0.001 <sup>1</sup> |
| PUBLIC | Public Acceptance(range 4 –28)              | 15.87 (14.23: 17.50) | 10.67 (9.56:11.77)   | 5.80 (3.69, 7.90)   | <0.001 <sup>2</sup> |
| SD     | Competence (range 4 – 28)                   | 19.75 (18.74:20.77)  | 17.91 (16.52: 18.92) | 1.97 (0.273, 3.68)  | 0.023               |
| OS     | Objective strain (range 11-55)              | 35.03 (32.81: 37.20) | 35.91 (34.08:38.01)  | -0.54 (-3.78, 2.70) | 0.744               |
| SIS    | Subjective Internalised strain (range 6-35) | 22.47 (21.21:23.60)  | 23.63 (22.89:25.03)  | -0.81 (-2.63, 1.00) | 0.380               |
| SES    | Subjective Externalised strain (range 4-20) | 7.74 (7.01: 8.46)    | 7.88 (7.28:8.49)     | -0.34 (-1.37, .69)  | 0.522               |

\*Adjusted for gender, age, location, education

1. There was a lesser albeit significant effect of having a dog for parents/guardians whose children attend a special school for children with ASD
2. There is no significant difference in ratings of parents/guardians who have a child in a main stream primary school (p=0.09)

1  
2  
3  
4  
5  
6  
7  
8  
9  
10  
11  
12  
13  
14  
15  
16  
17  
18  
19  
20  
21  
22  
23  
24  
25  
26  
27  
28  
29  
30  
31  
32  
33  
34  
35  
36  
37  
38  
39  
40  
41  
42  
43  
44  
45  
46  
47  
48  
49

Figure 1 – Parents/Guardians perceived benefits of having an assistance dog (themes and categories)

99% of parents/guardians with a dog listed at least two benefits.  
99% of parents/guardians on the wait list for a dog listed at least two benefits.  
Category 'Physiological' refers to how assistance dogs can facilitate a child with respect to mobility and ambulation.  
Category 'Management' refers to how assistance dogs can facilitate day to day management of their child.

Peer review only

1  
2  
3  
4  
5  
6  
7 Figure 2 – Parents/Guardians perceived constraints of having assistance dog (themes and categories)  
8

9 66% of parents/guardians with a dog listed at least two constraints.

10 64% of parents/guardians on the wait list for a dog listed at least two constraints.

11 \*Please note that one category 'other' from the waiting list group second constraint is not included in the figure.

12 Category 'Dogs life' refers to concerns about what happens when an assistance dog retires/dies.

13 Category 'Acceptance' refers to challenges around family and children's acceptance of an assistance dog.  
14  
15  
16  
17  
18  
19  
20  
21  
22  
23  
24  
25  
26  
27  
28  
29  
30  
31  
32  
33  
34  
35  
36  
37  
38  
39  
40  
41  
42  
43  
44  
45  
46  
47  
48  
49

1  
2  
3  
4  
5  
6  
7  
8 **Parents' perspectives on the value of assistance dogs for children with autism**  
9 **spectrum disorder: a cross sectional study**  
10

11  
12  
13  
14  
15 **Corresponding Author: Louise Burgoyne,**

16 **Institution: Department of Epidemiology & Public Health, University College Cork (UCC).**

17 **Contact: [l.burgoyne@ucc.ie](mailto:l.burgoyne@ucc.ie), ph.: 00-353-4205517, fax: 00-353-214205469.**  
18  
19

20  
21  
22 **Co-authors**

23 **Lisa Dowling, Final Year Medical Student, School of Medicine, UCC**

24 **Anthony Fitzgerald, Biostatistician, Department of Epidemiology & Public Health, UCC**

25 **Micaela Connolly, Psychologist, Brothers of Charity, Cork.**

26 **John Browne, Professor, Department of Epidemiology & Public Health, UCC**

27 **Ivan J Perry, Professor & Head of Department of Epidemiology & Public Health, UCC.**  
28  
29  
30  
31  
32  
33  
34

35 **Key Words**

36 **Public Health, Epidemiology, Autism Spectrum Disorders, Assistance Dogs, animal assisted**  
37 **interventions.**

38  
39  
40 **Word Count Revised Document:**

41 **Abstract = 304 words**

42 **Revised document = 5,027 words (excluding title page, references, tables,**  
43 **figures and bullet pointed strengths and weaknesses)**  
44  
45  
46  
47  
48  
49

50 This research received no specific grant from any funding agency in the public, commercial  
51 or not for profit sector. Technical appendix, statistical code, and dataset available from the  
52 corresponding author at University College Cork, who will provide a permanent home for  
53 the dataset.  
54  
55  
56  
57  
58  
59  
60

**Abstract.**

**Background:** Whilst there is an emerging literature on the usefulness of assistance dogs for children with Autism Spectrum Disorder (ASD), there is a dearth of quantitative data on the value of assistance **dog** interventions for the family unit and family functioning. **Objectives:** Using previously validated scales and scales developed specifically for this study, we measured parents/guardians perceptions of having an assistance dog on (a) child safety from environmental dangers, (b) public reception of ASD, (c) levels of caregiver strain and sense of competence. We also obtained open ended response data from parents/guardians on benefits and constraints of having an assistance dog. **Primary and Secondary Outcome Measures:** The primary outcome measures were scores on environmental hazards and public reception scales. Secondary outcome measures were scores on caregiver strain and competence scales. **Setting:** This study was based in the primary care setting, within the context of a specific **accredited** assistance **dog** **intervention** in Ireland. **Participants:** A total of 134 parents/guardians with an assistance dog, and **87** **parents of children** on the wait list were surveyed. **Results:** Parents/guardians of children who have ASD and an assistance dog rate their child as significantly safer from environmental dangers ( $p<0.001$ ), perceive that the public act more respectfully and responsibly towards their child ( $p<0.001$ ), and feel more competent about managing their child ( $p=0.023$ ) compared to **parents on the wait list.** There was an intensity of positive feeling towards assistance **dog** **interventions** with **particular focus on safety and comfort for children, and a sense of freedom** from family restrictions associated with ASD. The amount of dedication and commitment required to care for a dog were viewed as the primary constraints. **Conclusions:** Our findings indicate that **parents perceive that assistance dog interventions can be a valuable intervention** for families with children who have ASD.

### Main Strengths and Limitations of this study

- This study is the first to capture the views of a large group of parents/guardians on an assistance dog intervention.
- Findings suggest that parents perceive a high value in dogs for promoting safety, security and positive public reception for children with ASD.
- This study assessed the perceptions of parents/guardians on the wait list for a dog as opposed to using a stronger randomised control trial (RCT) design, where controls are randomly assigned to another intervention.

### Introduction

There is an expanding literature indicating the human mental and physical health benefits derived from interaction with companion animals.<sup>1</sup> The presence of animals as an intervention tool was first studied by psychotherapist Boris Levinson via a series of case studies.<sup>2</sup> At the time animals were seen as inferior replacements for human social interactions.<sup>3</sup> Since the 1970's animals have been used as a means of improving human physical, emotional, cognitive and social functioning. Animal assisted interventions (AAI) are classified into three groupings; animal assisted activities (AAA), animal assisted therapies (AAT) and service animal programmes (SAP).<sup>4</sup>

Animal assisted activities are delivered by trained personnel in environments such as hospitals and educational settings with an emphasis on quality of life enhancement via recreation and education e.g., therapeutic horse riding to treat populations with physical and mental disabilities.<sup>5-6</sup> Animal assisted therapies are practiced by professionals with

1  
2  
3 individualised therapy goals.<sup>7</sup> The emphasis is on improvements in physical, social and  
4  
5 cognitive functioning e.g., an occupational therapist working to facilitate fine motor skills  
6  
7 development in a child via a series of structured tasks such as grooming and feeding a cat.

8  
9  
10 A meta-analysis of the literature on AAT has shown that they are associated with moderate  
11  
12 effect sizes in improving outcomes in four areas: autism spectrum symptoms, medical  
13  
14 difficulties, behavioural problems, and emotional well-being.<sup>8</sup> A recent systematic review of  
15  
16 the literature on AAI for ASD has indicated preliminary 'proof of concept', but highlights the  
17  
18 needs for more rigorous research to establish a convincing evidence base.<sup>9</sup> This view is  
19  
20 upheld by another recent review pointing to the need for better research designs and larger  
21  
22 sample sizes.<sup>10</sup>

23  
24  
25  
26  
27  
28  
29 Service animal interventions (SAP) use dogs to assist people with a disability in performing  
30  
31 daily activities. Service dogs live in-house with the people they work with. Of late  
32  
33 assistance dogs have received growing attention as a means of aiding children with Autism  
34  
35 Spectrum Disorder (ASD). Qualitative inquiry on the integration of assistance dogs into ten  
36  
37 families with a child who has ASD, showed that the presence of a dog can improve quality of  
38  
39 life for children and parents.<sup>11</sup> A study examining risks and benefits of assistance dogs using  
40  
41 a series of structured interviews with 17 families, reported social and cognitive benefits in  
42  
43 addition to physical and medical benefits.<sup>12</sup> An experimental study which assessed the  
44  
45 effects of assistance dogs on basal salivary cortisol secretion of 42 children with ASD,  
46  
47 demonstrated a reduction in the cortisol awakening response and the number of disruptive  
48  
49 behavioural incidents post introduction of the dog.<sup>13</sup> Assistance dogs complete a unique  
50  
51 triad between parent/guardian and child. Typically the child is attached to the dog via a  
52  
53 lead (leash) and belt. The dog walks with the child but takes commands from the parent  
54  
55  
56  
57  
58  
59  
60

1  
2  
3 (handler).<sup>14</sup> If the child tries to step off a footpath or attempts to bolt, the dog will use all  
4  
5 his/her power to slow the child down. Assistance dogs prohibit dangerous behaviour such  
6  
7 as elopement (bolting) and provide a calming presence.  
8  
9

10  
11  
12 Elopement or the tendency to 'bolt' is characteristic of ASD. Such behaviour can result in a  
13  
14 child's exposure to dangerous traffic situations or encounters with strangers.<sup>15</sup> Despite  
15  
16 reports of higher mortality rates in ASD populations owing to accidents such as suffocation,  
17  
18 drowning and injuries, research on elopement behaviour is sparse.<sup>16-18</sup> If left untreated  
19  
20 elopement may result in the need for a child to be moved to a restrictive setting.<sup>19</sup> In a  
21  
22 systematic review of the literature on current elopement treatments such as function based  
23  
24 interventions, Lang and colleagues conveyed that just two of ten studies examined reported  
25  
26 complete elimination of elopement.<sup>20</sup> Treatments that effectively eliminate elopement  
27  
28 behaviours are warranted.  
29  
30  
31  
32  
33  
34  
35

36 Social, emotional and behavioural challenges at home and in public mean that  
37  
38 parents/guardians of children with ASD experience stress in most areas of their lives.<sup>21-24</sup> In  
39  
40 addition to behaviours such as elopement, public tantrums and the reaction from others are  
41  
42 regarded as being some of the more difficult aspects of a child with ASD's behaviour.  
43  
44 Situations can leave parents/guardians feeling judged as 'bad' parents, or feeling like a  
45  
46 failure.<sup>25</sup> In this context assistance dogs can provide a unique support by facilitating child  
47  
48 safety and promoting positive public reception. Outings to public places can become less  
49  
50 stressful and families can enjoy greater freedom and mobility. Given the resource  
51  
52 implications of assistance dog interventions for ASD, there is a need to assess the value of  
53  
54 acceptability and likely uptake of services.  
55  
56  
57  
58  
59  
60



1  
2  
3  
4  
5 Currently there are 188 service animal interventions registered with the standards body  
6 Assistance Dogs International (ADI). These interventions include guide dogs for the blind,  
7 hearing dogs for the hard of hearing, and service dogs for people with other disabilities  
8 including ASD. In this study we measured parents/guardians ratings on: (a) the impact of  
9 having an assistance dog on child safety from environmental hazards, (b) public acceptance  
10 and awareness of ASD, (c) sense of competence with managing a child with ASD and (d)  
11 levels of caregiver strain. We also obtained parents/guardians views on the primary  
12 benefits and constraints of having an assistance dog.  
13  
14  
15  
16  
17  
18  
19  
20  
21  
22  
23  
24  
25  
26

## 27 **Methods**

### 28 **Study Design and Participants**

29 Our study was based in the primary care setting, within the context of a specific national  
30 assistance dog intervention in the Republic of Ireland. All children who receive an  
31 assistance dog from this centre have been formally diagnosed with ASD via the Irish Health  
32 Services Executive (HSE) using standard tools such as the ADOS (Autism Diagnostic  
33 Observation Schedule), the ADI-R (Autism Diagnostic Interview) and the DISCO (Diagnostic  
34 Interview for Social Communication). Parents/guardians with an assistance dog (N=205)  
35 and parents/guardians on the waiting list for an assistance dog (N=107) were eligible to take  
36 part in the study. Expedited ethical approval was granted from the Clinical Research Ethics  
37 Committee of the Cork Teaching Hospitals. Data were gathered between October 2012 and  
38 March 2013.  
39  
40  
41  
42  
43  
44  
45  
46  
47  
48  
49  
50  
51  
52  
53  
54  
55  
56

### 57 **Measures**

1  
2  
3 Parents/guardians were asked to complete a four part questionnaire (Table 1). Part one  
4  
5 examined child demographics. Part two measured parents/guardians sense of competence  
6  
7 for managing a child with ASD using Perceived Competence Scales (PCS)<sup>26</sup> ( $\alpha = 0.876$ , 7  
8  
9 point scales: low-high competence). The PCS is a measure of one of three fundamental  
10  
11 psychological needs within Self Determination Theory.<sup>27-28</sup> Like other measures within  
12  
13 behavioural change theory, items on the PCS are typically written to be specific to the  
14  
15 relevant behaviour or domain being examined. A sample item from the PCS we used for this  
16  
17 study is 'I am able to do my own routine caring for my child with autism'. Part two also  
18  
19 assessed levels of strain using the Caregiver Strain Questionnaire CGSQ<sup>29</sup> ( $\alpha = 0.940$ , 5 point  
20  
21 scales: low-high strain), which has been validated to assess burden among caregivers of  
22  
23 children with autism.<sup>30</sup> The CGSQ asked participants to consider the past 6 months in terms  
24  
25 of the problems presented by items such as: 'interruption of personal time resulting from  
26  
27 your child's emotional or behavioural problem (Objective Strain)', 'how embarrassed did  
28  
29 you feel about your child's emotional or behavioural problem (Subjective Externalised  
30  
31 Strain)' and 'How worried did you feel about your child's future (Subjective Internalised  
32  
33 Strain)'.  
34  
35  
36  
37  
38  
39  
40  
41  
42  
43 Part three of the questionnaire examined perceptions of child safety from environmental  
44  
45 hazards such as traffic, dangerous materials and outdoor spaces ( $\alpha=0.928$ , 7 point scales:  
46  
47 low-high safety/security). Participants were asked to rate how strongly they agreed or  
48  
49 disagreed with respect to their child's safety and security over the past 3 months e.g., 'I am  
50  
51 confident that my child with autism is secure from environmental hazards when we go on  
52  
53 walks in our neighbourhood.' Part three also assessed parents/guardians ratings on the  
54  
55 general public's acceptance of their child ( $\alpha=0.940$ , 7 point scales: low-high acceptance). In  
56  
57  
58  
59  
60

1  
2  
3 this case participants were asked to rate the public's perception of their child over the past  
4  
5 three months on items such as 'I am sure that people make allowances for my child with  
6  
7 autism when we are in a restaurant'. Scales for part three were developed with reference  
8  
9 to the format and structure of the Neighbourhood Environment Walkability Scale – Youth,<sup>31</sup>  
10  
11 and via consultation with parents and author MC, who is a psychologist specialising in  
12  
13 children with ASD. Part four asked participants to list their views of the main  
14  
15 benefits/constraints of having an assistance dog via 'free text'. Those on the waiting list  
16  
17 were asked to give the benefits/constraints that they feel a dog will bring.  
18  
19  
20  
21  
22  
23

#### 24 **Pilot**

25  
26 We piloted the questionnaire with eight parents/guardians, four of which have an assistance  
27  
28 dog and four who are on the waiting list. Minor modifications were made to the final  
29  
30 questionnaire on the basis of their responses.  
31  
32  
33  
34  
35

#### 36 **Procedures**

37  
38 The primary caregiver from each family with an assistance dog, and each family on the  
39  
40 waiting list received a postal questionnaire from the contact person at the assistance dog  
41  
42 centre. In the interests of confidentiality, the researchers at University College Cork did not  
43  
44 have access to names and addresses of participants. The assistance dog's centre did not  
45  
46 have access to the completed questionnaires. Each questionnaire pack contained a consent  
47  
48 form with study details, a questionnaire, a stamped addressed envelope, and an envelope  
49  
50 marked 'Research'. Participants were requested to place completed questionnaires in the  
51  
52 envelope marked 'Research' and to seal it. They were asked to place the sealed envelope  
53  
54 together with the signed consent form in the stamped addressed envelope, and to post  
55  
56  
57  
58  
59  
60

1  
2  
3 back to the assistance dog centre. Participants were assured that participation in the study  
4  
5 would have no impact on their status with the centre, and that staff at the centre would  
6  
7 have no access to the survey data.  
8  
9

## 10 11 12 **Data Analysis**

13  
14  
15  
16  
17 Descriptive statistics are reported using frequencies tables. Chi Square tests were used to  
18  
19 test for differences between the categorical demographic variables. T-tests were used to  
20  
21 examine differences between parents of children with an assistance dog and those waiting  
22  
23 to receive one, within the data on competence, caregiver strain (CGSQ), environmental  
24  
25 hazards and public awareness. We then fitted a linear regression that included having a dog  
26  
27 or being on the wait list as a dichotomous variable and each of gender, age, home location  
28  
29 and education as factors.  
30  
31  
32  
33  
34

35  
36 Qualitative data were analysed via open coding, followed by a process of categorisation  
37  
38 which facilitated the emergence of themes. Author LB analysed the qualitative data initially  
39  
40 and author LD completed a second analysis and cross check.  
41  
42  
43  
44

## 45 **Results**

### 46 47 **Demographics**

48  
49 A total of 134 parents/guardians with an assistance dog (65% response), and 87  
50  
51 parents/guardians from the wait list (81% response) completed the questionnaire. A large  
52  
53 proportion of participants with a dog have children over the age of ten (40%) compared to  
54  
55  
56  
57  
58  
59  
60

1  
2  
3 just three participants from the wait list. For this reason we eliminated the 'over tens' from  
4  
5 further analysis in this paper.  
6  
7  
8  
9

10 A breakdown of the demographic characteristics of participants' children is in Table 2. A  
11 majority are male (87.5% with dog; 91.7% waiting list) and similar percentages have other  
12 medical conditions in addition to ASD (35% with dog; 32.1% wait list). Other conditions  
13 include mild to moderate learning difficulties, ADHD, asthma and epilepsy. The largest  
14 group live in suburban areas (41.3% with dog; 57% wait list) followed by the countryside  
15 (45% with dog; 34% wait list). Over half of the children with a dog are verbal (52.5%) and  
16 under half of those waiting for a dog are verbal (42%). There are differences in types of  
17 school attended between participants whose children have an assistance dog and those  
18 who do not yet have a dog. These are reflective of the remaining age differences between  
19 the two groups post removal of the over tens from the total sample. The main difference is  
20 that 61.3% of children with a dog attend a special school for ASD compared to 35.7% of the  
21 wait list. Conversely 34.5% of children on the wait list are in a special class in primary school  
22 compared to 21.3% who have a dog.  
23  
24  
25  
26  
27  
28  
29  
30  
31  
32  
33  
34  
35  
36  
37  
38  
39  
40  
41  
42

43 With regard to conventional interventions received there are some descriptive differences  
44 between participants whose children have an assistance dog and those on the wait list for a  
45 dog (Table 2). There is a less than 10% difference between the groups for regular speech  
46 and language therapy (47.5% with dog; 38.1% wait list) and regular occupational therapy  
47 (46.3% with dog; 38.1% wait list). Similar percentages from both groups have a resource  
48 teacher (25% with dog; 26.2% wait list), and there is a 12% difference with regard to special  
49 needs assistants (80% with dog; 67.9% wait list)  
50  
51  
52  
53  
54  
55  
56  
57  
58  
59  
60

1  
2  
3  
4  
5 There are significant differences between profiles of children who have a dog and children  
6 waiting for a dog with respect to age and schooling. There are no significant differences  
7  
8 between the groups for other conditions in addition to ASD, whether a child is verbal or  
9  
10 nonverbal, conventional interventions and home location.  
11  
12  
13

### 14 15 16 17 **Environmental Hazards & Public Awareness**

18  
19 The environmental hazards scales are summarized in Table 3. Ratings are from low  
20  
21 perceived safety to high safety. T-test results showed that mean ratings are significantly  
22  
23 higher ( $p<0.001$ ) for parents/guardians whose children have a dog (32.43) than for those on  
24  
25 the waiting list (22.97). These differences remain significant after adjusting for gender, age,  
26  
27 home location and school type ( $p<0.001$ ). We did however find a significant interaction  
28  
29 between school types and whether children have a dog. Although there are significant  
30  
31 differences between the rating of parents/guardians with a dog and those on the waiting list  
32  
33 for children attending a special school for autism (mean difference=6.62: 95%CI 0.639,  
34  
35 12.61), the effect is not as large as it is for children attending a primary school (mean  
36  
37 difference=12.53: 95%CI 4.16, 20.90) or a special class in a primary school (mean  
38  
39 difference=19.49: 5%CI 13.171, 25.821).  
40  
41  
42  
43  
44  
45  
46  
47

48 The range of scores from the public perception scales (Table 3) are from low to high, with  
49  
50 higher scores indicating a perception from parents/guardians that people act more  
51  
52 respectfully and responsibly towards children with ASD when in public settings. T test  
53  
54 results showed that parents/guardians mean ratings are significantly higher ( $p<0.001$ ) for  
55  
56 those whose children have an assistance dog (15.87) than for the wait list (10.67). For the  
57  
58  
59  
60

1  
2  
3 most part these differences remain significant after adjusting for gender, age, home location  
4  
5 and education level ( $p < 0.001$ ). However, there was a significant interaction between type  
6  
7 of school attended and whether children have an assistance dog. Although there are  
8  
9 significant differences between the ratings of parents/guardians with a dog and those on  
10  
11 the waiting list where their children attend a special school for autism (mean  
12  
13 difference=6.65: 95%CI 3.79, 9.51), and a special class in primary school (mean  
14  
15 difference=7.01: 95%CI 2.88, 11.13), there is no significant difference in the ratings of  
16  
17 parents/guardians who have a child in a main stream primary school ( $p=0.09$ ).  
18  
19  
20  
21  
22  
23

#### 24 **Perceived Competence and Caregiver Strain**

25  
26 A summary of results from parents/guardians perceived competencies with regard to caring  
27  
28 for and managing their child with ASD are in Table 3. T-test results show that mean scores  
29  
30 for parents/guardians whose children have an assistance dog (19.75), are significantly higher  
31  
32 (p=0.02) in terms of perceived competencies than those on the waiting list (17.91). This  
33  
34 difference remained significant after adjusting for gender, age, home location and education  
35  
36 level ( $p=0.02$ ). Results from the Caregiver Strain Questionnaire (CGSQ) (Table 3) show that  
37  
38 parents/guardians who have a dog rated slightly lower levels of strain than those on the  
39  
40 wait list. However we found no significant differences between the groups with regard to  
41  
42 any of the individual items on the scales, or the summarized scores for 'objective strain',  
43  
44 'subjective internalized strain', and 'subjective externalized strain'.  
45  
46  
47  
48  
49  
50  
51  
52  
53  
54

#### 55 **Benefits and Constraints**

1  
2  
3 Qualitative data were analysed using a thematic approach and constant comparison  
4  
5 techniques by authors LB and LD. Each participant response was reviewed and codes were  
6  
7 assigned to each 'segment of meaning'. Open codes were assigned to representative  
8  
9 categories. The process of coding and categorisation facilitated the emergence of themes  
10  
11 from within the data. Initial qualitative analysis was performed by LB, and these results  
12  
13 were cross-checked and refined by LD. We analysed the first and second listed benefits and  
14  
15 constraints of having an assistance dog. Data beyond the first two benefits and constraints  
16  
17 are sparse and not reported.  
18  
19  
20  
21

22  
23  
24 Three themes were identified under 'benefits'. These were; physical factors, relationship  
25  
26 factors and family factors (Figure 1). 'Physical factors' is divided into four categories and  
27  
28 focuses on how assistance dogs can keep a child safe whilst facilitating parents' ability to  
29  
30 manage: *"A sense of security & protection for our daughter especially walking in local*  
31  
32 *environments"* (parent of girl 7-9yo with a dog), *"(Dog) will stop child from bolting from*  
33  
34 *home"* (parent of boy 4-6yo on waiting list). For 3 out of 4 categories, this theme is evenly  
35  
36 dispersed between parents who have a dog and waiting list controls. For the fourth  
37  
38 category 'no bolt', more parents/guardians from the waiting list state the benefit of the dog  
39  
40 being able to stop the child from eloping. 'Relationship factors' is grouped into two  
41  
42 categories and centres on the direct positive relationship between the child with ASD and  
43  
44 his/her assistance dog: *"She is his very best friend"* (parent of boy 4-6yo with a dog), *"It*  
45  
46 *might calm him down instead of him head banging the windows"* (parent of boy 4-6yo on  
47  
48 *waiting list*). The categories making up this theme are almost evenly dispersed between  
49  
50 parents/guardians who have a dog and waiting list controls. 'Family factors' is split into five  
51  
52 categories and is about how day to day family and social life is affected by the introduction  
53  
54  
55  
56  
57  
58  
59  
60



1  
2  
3 of an assistance dog: *"Ability to do maybe ordinary things and go to ordinary places"* (parent  
4 of boy 7-9yo on waiting list), *"a sense of responsibility, for example he can feed the dog"*  
5  
6  
7  
8  
9  
10  
11 among parents/guardians with a dog and those on the waiting list. For example benefits  
12 listed by those with a dog formed more of the category 'visibility', which is about public  
13 reception and awareness of ASD. Benefits listed by parents/guardians on the waiting list  
14 formed more of the categories 'social' and 'emotion and stress'. 'Social' is about a child  
15 with ASD's sociability with family and outside the home. 'Emotion and stress' is about levels  
16 of emotion/stress in the family, and to a lesser extent the ability of the child to express  
17 emotion.  
18  
19  
20  
21  
22  
23  
24  
25  
26  
27  
28

29 Four themes emerged from the data on constraints. These were; 'change factors',  
30 'relationship factors', 'limiting factors' and 'no constraints' (Figure 2). Change factors has  
31 three categories and focuses on life style challenges that parents/guardians experience or  
32 anticipate experiencing when they have an assistance dog: *"Its' like an additional child in the*  
33 *family"*(parent of boy 4-6yo with a dog), *"To make time to go for walks everyday"* (parent of  
34 *boy 7-9yo on waiting list)*. The categories comprising this theme are quite evenly dispersed  
35 between parents/guardians of children with a dog and those on the waiting list. Slightly  
36 more parents/guardians waiting for a dog list 'dedication', which is the time and effort given  
37 to care for the dog as a main constraint. As with the benefits themes, 'relationship factors'  
38 is about the direct relationship between the child with ASD and the dog: *"My son may not*  
39 *connect with the dog"* (parent of boy 4-6yo on waiting list), *"my concern is when the dog has*  
40 *to retire, how will my child cope?"* (parent of boy 7-9yo with a dog). More  
41  
42  
43  
44  
45  
46  
47  
48  
49  
50  
51  
52  
53  
54  
55  
56  
57  
58  
59  
60  
61

1  
2  
3 concerned about how the dog will be accepted by the child and other family members. The  
4  
5 third theme 'limiting factors' has four associated categories and centres on day to day  
6  
7 constraints of having a dog on family life; *"Extra expense for food, vet bills etc"* (parent of  
8  
9 boy 7-9yo with a dog), *"it will be a bit difficult to travel"* (parent of boy 4-6yo on waiting list).  
10  
11  
12 There are large differences in the dispersal of two of the categories within this theme. In  
13  
14 particular, more parents/guardians whose children have a dog contributed to the category  
15  
16 'clean' , which is about day to day hygiene activities related to the dog e.g., dog hair in the  
17  
18 house and dealing with dog toileting. More parents/guardians on the waiting list  
19  
20 contributed to a category on 'holidays', which expressed concerns about going on holidays  
21  
22 with the dog. The final theme 'no constraints' has just one category. This was a category in  
23  
24 which parents/guardians stated no issues for concern or anticipated drawbacks; *"There are*  
25  
26 *none....our dog is a valuable and much loved addition to the family"* (parent of boy 7-9yo  
27  
28 *with a dog)*, *"don't anticipate any, feeling very positive about it"* (parent of boy 4-6yo on  
29  
30 *waiting list*). This category was almost evenly dispersed between parents whose children  
31  
32 have a dog and those on the waiting list.  
33  
34  
35  
36  
37  
38  
39  
40

## 41 Discussion

42  
43 Our study is the first to capture the views of a large group of parents/guardians on an  
44  
45 assistance dog **intervention**. Quantitative findings indicate the value of dogs in promoting  
46  
47 safety, security and positive public reception for children with ASD. They also suggest that  
48  
49 the presence of an assistance dog **may** make parents/guardians feel more competent with  
50  
51 managing their child. Qualitative findings indicate the role assistance dogs play in  
52  
53 promoting child safety, calmness and provision of friendship. They also highlight the role  
54  
55 the dog has in facilitating 'normal' family functioning, such as being able to visit a shopping  
56  
57  
58  
59  
60

1  
2  
3 centre. Constraints associated with having a dog relate to specific lifestyle changes  
4  
5 experienced by parents/guardians and the larger family group, such as dedicated care of the  
6  
7 dog.  
8  
9

10  
11  
12 There are several study limitations. Firstly, our findings are based on self-reports and  
13  
14 parents/guardians personal perceptions and are thus subject to participant overestimation,  
15  
16 recall bias and possible subject expectancy effects. Also since we did not include any  
17  
18 objective measures, we cannot know if parents perceptions reflect reality e.g., were  
19  
20 children actually safer and did the public actually view them more positively when  
21  
22 accompanied by an assistance dog. Secondly, there were differences in children's ages and  
23  
24 type of schools attended between our two sample groups which resulted in removal of the  
25  
26 over tens from our analyses and a reduction in sample size. Thirdly we did not assess the  
27  
28 views of parents/guardians who are not registered with the assistance dog centre. Our  
29  
30 results therefore can only be relevant to parents who are open to the possibility of having  
31  
32 an assistance dog. A fourth limitation of the study is that we assessed the perceptions of  
33  
34 waiting list controls as opposed to using a RCT design, where controls are randomly assigned  
35  
36 to another intervention. Ideally we would employ a planned activity, another animal such  
37  
38 as a cat, or a robotic dog as a control. Such a design was not feasible however and the  
39  
40 current data do provide insights.  
41  
42  
43  
44  
45  
46  
47  
48  
49

50 Recognition of the value animal interventions play in promoting human health is gaining  
51  
52 momentum. Animal interventions have been shown to produce increases in self-efficacy  
53  
54 and coping in psychiatric patients<sup>32-33</sup> promote recovery from ill health<sup>34, 3, 35</sup>, and improve  
55  
56 academic performance, adaptive functioning and behavioural/emotional problems with  
57  
58  
59  
60

1  
2  
3 special education adolescents.<sup>36</sup> Autism spectrum disorder is one of the areas within which  
4  
5 animal interventions have had most success.<sup>8</sup> This is particularly the case for assistance dog  
6  
7 interventions, since dogs not only provide a possible mechanism for promoting  
8  
9 improvements in social and behavioural functioning, they also play a part in control of  
10  
11 elopement and promotion of child safety. Once a child is attached to a dog **via the leash**  
12  
13 **and belt system** they cannot 'bolt'. In this study parents/guardians with a dog rated their  
14  
15 child as considerably more safe from environmental hazards than did waiting list controls.  
16  
17 We did find a reportable interaction between having an assistance dog, type of school  
18  
19 attended and parents/guardians ratings. This interaction indicated a lesser albeit significant  
20  
21 effect of having a dog for parents/guardians whose children attend a special school for ASD.  
22  
23 The smaller effect may be due to the specific care that children and families receive from  
24  
25 ASD schools. Currently there are no interventions that can successfully eliminate elopement  
26  
27 among children with ASD.<sup>20</sup> Our quantitative findings support the role of assistance dogs in  
28  
29 providing this service. Our qualitative findings provide additional validation with safety and  
30  
31 security being the most frequently stated benefit of having a dog.  
32  
33  
34  
35  
36  
37  
38  
39  
40

41 Behavioural, social and emotional difficulties that encompass the lives of children with ASD  
42  
43 can impact on parents/guardians wellbeing.<sup>21-22</sup> Our findings suggest that assistance dogs  
44  
45 can provide parents/guardians with a higher sense of competency with regard to managing  
46  
47 their child than waiting list controls. This result may reflect added supports dogs provide in  
48  
49 public settings. Indeed public tantrums and reactions from the public are regarded as one  
50  
51 of the more difficult aspects of a child with ASD's behaviour.<sup>25</sup> Qualitative results from this  
52  
53 study highlight the role that an assistance dog has in promoting public awareness and  
54  
55 acceptance of ASD. Quantitative results suggest that parents/guardians whose children  
56  
57  
58  
59  
60

1  
2  
3 have assistance dogs rate the public's perception of their child as more positive. Our  
4  
5 regression analysis did show an interaction between having an assistance dog and type of  
6  
7 school attended. On examination we found that whilst the ratings of parents/guardians  
8  
9 remained significantly different where their children attend a special school for autism or a  
10  
11 special class in primary school, they were not significantly so where children attend a main  
12  
13 stream primary school. Such a result may reflect a lack of awareness/acceptance of ASD in  
14  
15 main stream schools.  
16  
17  
18  
19

20  
21  
22 Our findings from the caregiver strain questionnaire (CSGQ) show no significant differences  
23  
24 between parents/guardians who have a child with a dog, and those waiting to receive a dog.  
25  
26 There are three sub scales within the CSGQ. 'Objective strain' deals with the caregiver  
27  
28 burden on day to day tasks related to care, 'subjective internalized strain' deals with  
29  
30 negative feelings internal to the caregiver, and 'subjective externalized strain' deals with  
31  
32 negative feelings by the caregiver towards the child. We considered two reasons which may  
33  
34 explain the lack of any real differences between the groups with regard to caregiver strain.  
35  
36  
37

38 Firstly, it is known that being a parent/guardian of a child with ASD can affect quality of life  
39  
40 with respect to levels of care and support required, and the resulting impacts on family  
41  
42 finance and family time.<sup>37-38</sup> In our study parents/guardians expressed that the dedication  
43  
44 required to care for a dog is a main constraint. Assistance dogs require feeding, exercise,  
45  
46 affection, grooming, regular company and financial expenditure. The added tasks of looking  
47  
48 after an assistance dog may not therefore impact positively upon levels of caregiver strain.  
49  
50  
51

52  
53 Secondly, we noticed that our sample scores on the CSGQ were generally less positive than  
54  
55 scores from parents/guardians who took part in the most recent CSGQ validation study.<sup>30</sup>  
56

57 This may reflect a lower provision of services for families of children with autism in the  
58  
59  
60

1  
2  
3 Republic of Ireland. It is interesting to note that although there were no significant  
4  
5 differences between parents/guardians who have a dog and those on the wait list for a dog  
6  
7 with respect to caregiver strain, there were significant differences with respect to perceived  
8  
9 competence. Why do parents/guardians with a dog feel more competent but no less  
10  
11 strained? A possible explanation is that the process and actual event of getting an  
12  
13 assistance dog, and the specific procedures followed with respect to working with the dog,  
14  
15 may make parents/guardians feel more competent. Having a dog may add more structure  
16  
17 to parent's management technique without necessarily reducing levels of strain associated  
18  
19 with having a child with ASD.  
20  
21  
22  
23  
24  
25  
26

27 The ability of assistance dogs to provide a sense of calm and comfort for children with ASD is  
28  
29 documented.<sup>11,13</sup> Qualitative results from this study lend support to this view.  
30

31 Parents/guardians with an assistance dog frequently mentioned the dogs' ability to promote  
32  
33 calmness in their child. Those on the waiting list anticipated ways in which the dog would  
34  
35 aid their child in times of distress. Previous research has recognised the role that dogs have  
36  
37 in facilitating social development in children with ASD.<sup>12, 36 & 39</sup> Our qualitative findings  
38  
39 point to the idea that assistance dogs can act as a 'bridge' between children and the physical  
40  
41 and social environment. However, more parents/guardians on the waiting list for a dog  
42  
43 wrote about the anticipated ability of a dog to promote social development in their children  
44  
45 than those with a dog. Those with a dog wrote more about the increased public awareness  
46  
47 and acceptance of their child as a main benefit. It may be that although parents waiting for  
48  
49 a dog anticipate changes in social interaction, this does not emerge as the most important  
50  
51 benefit once they actually get a dog. That assistance dogs may facilitate social interaction in  
52  
53 children with ASD is not in dispute. However, this role may be more suited to animal  
54  
55  
56  
57  
58  
59  
60

1  
2  
3 assisted therapy (AAT), where a trained therapist may work with a dog to reach specific  
4  
5 cognitive or behavioural goals for a child. Parents/guardians listed constraints of having an  
6  
7 assistance dog were centred on the lifestyle changes. Such changes include the care and  
8  
9 costs required to ensure a dogs' health and wellbeing in addition to the restrictions  
10  
11 associated with the dogs' requirements for exercise and companionship. It is important to  
12  
13 recognise that each parent/guardian has a different level of tolerance for specific canine  
14  
15 behaviours.<sup>40</sup> Whilst many of the parents/guardians in our study discounted the constraints  
16  
17 of having a dog, some were explicit about their concerns. More of those with an assistance  
18  
19 dog expressed concern about the increase in housekeeping tasks, and specific hygiene  
20  
21 activities associated with having a dog in the family home. Parents/guardians with children  
22  
23 on the wait list were more concerned about whether the dog will be accepted by the child  
24  
25 and family, and logistics during family holiday time. Our results suggest that some of the  
26  
27 anticipated constraints do not necessarily emerge as the most important constraints once a  
28  
29 dog is placed in the home.  
30  
31  
32  
33  
34  
35  
36  
37

## 38 Conclusions

39  
40 Our findings indicate that parents/guardians perceive assistance dog interventions are  
41  
42 valuable in the treatment of ASD, particularly in relation to the control of elopement. They  
43  
44 also perceive that assistance dogs help to promote calmness and provide a source of  
45  
46 comfort for children.  
47  
48

## 49 Funding Statement

50  
51 This research received no specific grant from any funding agency in the public, commercial  
52  
53 or not for profit sectors.  
54  
55

## 56 References

- 1  
2  
3 1. O'Haire (2010) Companion animals and human health: Benefits, challenges and the road  
4 ahead. *Journal of Veterinary Behaviour* 5, 226-234.
- 5  
6  
7 2. Levinson (1969). *Pet-oriented Child Psychotherapy* Springfield Illinois, Charles C Thomas.
- 8  
9 3. Endenburg, N. and H. A. van Lith (2011). "The influence of animals on the development of  
10 children." *Vet J* 190(2): 208-214.
- 11  
12 4. Lasa, S. M., G. Ferriero, et al. (2011). "Animal-assisted interventions in internal and  
13 rehabilitation medicine: a review of the recent literature." *Panminerva Medica* 53(2): 129-  
14 136.
- 15  
16 5. Bass, M., C. Duchowny, et al. (2009). "The Effect of Therapeutic Horseback Riding on  
17 Social Functioning in Children with Autism." *Journal of Autism and Developmental Disorders*  
18 39(9): 1261-1267.
- 19  
20  
21 6. Kern, J. K., C. L. Fletcher, et al. (2011). "Prospective Trial of Equine-assisted Activities in  
22 Autism Spectrum Disorder." *Alternative Therapies in Health and Medicine* 17(3): 14-20.
- 23  
24  
25 7. Parish-Plass, N. (2008). "Animal assisted therapy with children suffering from insecure  
26 attachment due to abuse and neglect: a method to lower the risk of intergenerational  
27 transmission of abuse?" *Clinical Child Psychology and Psychiatry* 13(2): 23.
- 28  
29  
30 8. Nimer, B. L. J. (2007). "Animal assisted therapy: a meta analysis." *Anthrozoos* 20: 13.
- 31  
32  
33 9. O'Haire, M. E. (2013). Animal-assisted intervention for autism spectrum disorder: A  
34 systematic literature review. *Journal of Autism and Developmental Disorders* 43(7): 1606-  
35 1622
- 36  
37 10 Berry , A., Borgi, M., Francia., N., Alleva E., Cirulli, F (2012) Use of assistance and therapy  
38 dogs for children with autism spectrum disorders: A critical review of the current evidence. *J*  
39 *Altern Complement Med*, 19(2), 73-80.
- 40  
41  
42 11. Burrows, K. E., C. L. Adams, et al. (2008). "Sentinels of Safety: Service Dogs Ensure Safety  
43 and Enhance Freedom and Well-Being for Families With Autistic Children." *Qualitative*  
44 *Health Research* 18(12): 1642-1649.
- 45  
46  
47 12. Davis, B. W., K. Nattrass, et al. (2004). "Assistance dog placement in the pediatric  
48 population: Benefits, risks, and recommendations for future application." *Anthrozoos* 17(2):  
49 130-145.
- 50  
51  
52 13. Viau, R., G. Arsenault-Lapierre, et al. (2010). "Effect of service dogs on salivary cortisol  
53 secretion in autistic children." *Psychoneuroendocrinology* 35(8): 1187-1193.
- 54  
55  
56 14. Burrows, K. E., C. L. Adams, et al. (2008). "Factors affecting behavior and welfare of  
57 service dogs for children with autism spectrum disorder." *J Appl Anim Welf Sci* 11(1): 42-62.
- 58  
59  
60



15. Piazza, C. C., G. P. Hanley, et al. (1997). "Functional analysis and treatment of elopement." *J Appl Behav Anal* 30(4): 653-672.
16. Shavelle RM, Strauss DJ, Pickett J. Causes of death in autism. *J Autism Dev Disord*. 2001;31(6):569–576
17. McIlwain L, Fournier W. Wandering and autism: the need for data and resources. National Autism Association; 2010. Available at: [http://iacc.hhs.gov/events/2010/slides\\_fournier\\_mcilwain\\_102210.pdf](http://iacc.hhs.gov/events/2010/slides_fournier_mcilwain_102210.pdf).
- 18 Anderson, C., J. K. Law, et al. (2012). "Occurrence and family impact of elopement in children with autism spectrum disorders." *Pediatrics* 130(5): 870-877.
19. Perrin, C. (2008). "Brief functional analysis and treatment of elopement in preschoolers with autism." *Behavioural Interventions* 23: 8.
20. Lang, R., M. Rispoli, et al. (2009). "Treatment of elopement in individuals with developmental disabilities: a systematic review." *Res Dev Disabil* 30(4): 670-681.
21. Firth, I. and R. Dryer (2013). "The predictors of distress in parents of children with autism spectrum disorder." *J Intellect Dev Disabil* 38(2): 163-171.
22. Seymour M, Wood C, Giallo R, Jellett R J (2013) Fatigue, stress and coping in mothers of children with an autism spectrum disorder *Autism Dev Disord*. Jul;43(7):1547-54
23. de Andrés-García S, Sariñana-González P, Romero-Martínez A, Moya-Albiol L, Gonzalez-Bono E. (2013) Cortisol response to stress in caregivers of offspring with autism spectrum disorder is associated with care recipient characteristics. *Stress* 16(5): 510-9
24. Hayes SA, Watson SL. (2013) The impact of parenting stress: a meta-analysis of studies comparing the experience of parenting stress in parents of children with and without autism spectrum disorder. *J Autism Dev Disord* 43 (3): 629-42.
25. Ludlow, A., C. Skelly, et al. (2012). "Challenges faced by parents of children diagnosed with autism spectrum disorder." *J Health Psychol* 17(5): 702-711.
26. Williams, G. C., Freedman, Z.R., & Deci, E. L. (1998). Supporting autonomy to motivate glucose control in patients with diabetes. *Diabetes Care*, 21, 1644-1651
27. Deci, E. L., & Ryan, R. M. (1985). *Intrinsic motivation and self-determination in human behavior*. New York: Plenum.
28. Deci, E. L., & Ryan, R. M. (2000). The "what" and the "why" of goal pursuits: Human needs and the self-determination of behavior. *Psychological Inquiry*, 11, 227-268.

- 1  
2  
3 29. Brannan AM, Heflinger CA and Bickman L (1997) The caregiver strain questionnaire:  
4 measuring the impact on the family of living with a child with serious emotional problems,  
5 Journal of Emotional and Behavioural Disorders 5(4): 212-222.  
6
- 7  
8 30. Khanna R, Madhavan S, Smith MJ, Tworek C, Patrick JH, Becker-Cottrill B. (2011)  
9 Psychometric properties of the Caregiver Strain Questionnaire (CGSQ) among caregivers of  
10 children with autism. Autism. 16 (2), 179-99.  
11
- 12  
13 31. Rosenberg D, Ding D, Sallis JF, Kerr J, Norman GJ, Durant N, Harris SK, Saelens BE (2009)  
14 Neighborhood Environment Walkability Scale for Youth (NEWS-Y): reliability and  
15 relationship with physical activity. Prev Med. 49(2-3):213-8.  
16
- 17  
18 32. Berget B, Ekeberg O, Braastad B (2008) Animal assisted therapy with farm animals for  
19 persons with psychiatric disorders: effects on self efficacy, coping ability and quality of life, a  
20 randomised controlled trial. Clin Pract Epidemiol Ment Health, 4: 9.  
21
- 22  
23 33. Bizub AL, Joy A, Davidson L. (2003) "It's like being in another world": demonstrating the  
24 benefits of therapeutic horseback riding for individuals with psychiatric disability. Psychiatr  
25 Rehabil J. 2003 Spring;26(4):377-84.  
26
- 27  
28 34. Friedmann, E., & Thomas, S. A. (1995). Pet ownership, social support, and one year  
29 survival after acute myocardial infarction in the cardiac arrhythmia suppression trial (CAST).  
30 American Journal of Cardiology, 76, 1213–1217.  
31
- 32  
33 35. Morrison, M. L. (2007). Health benefits of animal-assisted interventions. Complementary  
34 Health Practice Review, 12(1), 51–62.  
35
- 36  
37 36. Katcher, A H & Teumer, S P (2006). A four year trial of animal assisted therapy with  
38 public school special education students.. Handbook on animal assisted therapy: theoretical  
39 foundations and guidelines. Aubrey fine (2<sup>nd</sup> ed) Academic Press San diego.  
40
- 41  
42 37. Jarbrink K (2008) The economic consequences of autistic spectrum disorder among  
43 children in a Swedish municipality. Autism Vol 11(5) 453–463  
44
- 45  
46 38. Cassidy A, McConkey R, Truesdale-Kennedy M and Slevin E Preschoolers with autism  
47 spectrum disorders: the impact on families and the supports available to them. Early Child  
48 Development and Care Vol 178(2),115–128  
49
- 50  
51 39. Solomon O, 2010 What a dog can do: children with autism and therapy dogs in social  
52 interaction. Journal of the society for psychological anthropology. 38: 1 143-166.  
53
- 54  
55 40. Sanders C R (2004). Excusing tactics: social responses to the public misbehaviour of  
56 companion animals. Anthrozoos, 4, 82-90.  
57  
58  
59  
60

Table 1 Questionnaire subsections, details and measures.

| Section                                   | Details                                                                                                                                                                                                                                                                                                                                                                           | Measure                                                                                                                |
|-------------------------------------------|-----------------------------------------------------------------------------------------------------------------------------------------------------------------------------------------------------------------------------------------------------------------------------------------------------------------------------------------------------------------------------------|------------------------------------------------------------------------------------------------------------------------|
| <b>Part 1. Demographics</b>               | <ol style="list-style-type: none"> <li>Gender, age, other medical conditions, age of diagnosis, home location.</li> <li>Education, learning level, verbal/non verbal Interventions and therapies received</li> </ol>                                                                                                                                                              | Tick boxes, yes/no options, free text.                                                                                 |
| <b>Part 2. Parenting &amp; Autism</b>     | <ol style="list-style-type: none"> <li>Perceived competence<br/>From: Self Determination Theory<br/><i>Deci &amp; Ryan (1985 &amp; 2000)</i></li> <li>Caregiver strain questionnaire<br/>From: <i>Brannan et al (1997) &amp; Khanna et al., (2011)</i><br/><i>Objective strain</i><br/><i>Subjective internalised strain</i><br/><i>Subjective externalised strain</i></li> </ol> | <p>Four items on a 7-point scale</p> <p>21 items on a 5 point scale.</p> <p>11 items</p> <p>6 items</p> <p>4 items</p> |
| <b>Part 3. Environment &amp; Public</b>   | <ol style="list-style-type: none"> <li>Environment safety and security<br/>Adapted from scale structures:<br/><i>Rosenberg et al., (2009)</i></li> <li>Public Perception</li> </ol>                                                                                                                                                                                               | <p>Eight items on a 7-point scale.</p> <p>Four items on a 7-point scale.</p>                                           |
| <b>Part 4. Benefits &amp; constraints</b> | <ol style="list-style-type: none"> <li>Benefits of having an assistance dog</li> <li>Constraints of having an assistance dog</li> </ol>                                                                                                                                                                                                                                           | Free text.                                                                                                             |

1  
2  
3  
4  
5  
6  
7  
8  
9  
10  
11  
12  
13  
14  
15  
16  
17  
18  
19  
20  
21  
22  
23  
24  
25  
26  
27  
28  
29  
30  
31  
32  
33  
34  
35  
36  
37  
38  
39  
40  
41  
42  
43  
44  
45  
46  
47  
48  
49

For peer review only

Table 2 Participant Characteristics (With Dog n=80, Waiting list for Dog n=84)

| <i>Characteristics</i>  |                         | <i>With Dog<br/>N (%)</i> | <i>Waiting for Dog<br/>N (%)</i> | <i>P-value</i> |
|-------------------------|-------------------------|---------------------------|----------------------------------|----------------|
| <b>Gender</b>           | Male                    | 70 (87.5)                 | 77 (91.7)                        | *              |
| <b>Age</b>              | 0-6 years               | 30 (37.5)                 | 60 (71.4)                        | <0.001         |
|                         | 7-9 years               | 50 (62.5)                 | 24 (28.6)                        |                |
| <b>Location</b>         | Town/city centre        | 11 (13.8)                 | 8 (9.0)                          | 0.217          |
|                         | Suburb                  | 33 (41.3)                 | 47 (57.0)                        |                |
|                         | Countryside             | 36 (45.0)                 | 28 (34.0)                        |                |
| <b>Other conditions</b> | Yes                     | 24 (30.0)                 | 27 (32.1)                        | 0.767          |
| <b>Verbal</b>           | Yes                     | 42 (52.5)                 | 35 (42.0)                        | 0.165          |
| <b>Education</b>        | Preschool               | 0                         | 10 (11.9)                        | *              |
|                         | Home tuition            | 1 (1.0)                   | 4 (5.0)                          | *              |
|                         | Primary                 | 13 (16.3)                 | 11 (31.1)                        | 0.025          |
|                         | Special class (Primary) | 17 (21.3)                 | 29 (34.5)                        |                |
|                         | Special school (ASD)    | 49 (61.3)                 | 30 (35.7)                        |                |
| <b>Interventions</b>    | Speech and Language     | 38 (47.5)                 | 32 (38.1)                        | 0.224          |
|                         | Occupational Therapy    | 37 (46.3)                 | 32 (38.1)                        | 0.290          |
|                         | Resource Teacher        | 20 (25.0)                 | 22 (26.2)                        | 0.861          |
|                         | Special Needs Assistant | 64 (80.0)                 | 57 (67.9)                        | 0.077          |

P-values are from valid chi-square tests. \*not included in chi-square analysis – numbers do not meet minimum expected count.

1  
2  
3  
4  
5  
6  
7  
8  
9  
10  
11  
12  
13  
14  
15  
16  
17  
18  
19  
20  
21  
22  
23  
24  
25  
26  
27  
28  
29  
30  
31  
32  
33  
34  
35  
36  
37  
38  
39  
40  
41  
42  
43  
44  
45  
46  
47  
48  
49

Table 3. Summary of results from Environmental Hazards, Public Awareness, Competence and Caregiver Strain scales.

| Item   | Description                                 | Mean (95%CI)         |                      | Diff* (95% CI)      | P-value             |
|--------|---------------------------------------------|----------------------|----------------------|---------------------|---------------------|
|        |                                             | With Dog (n=80)      | Waiting Dog (n=84)   |                     |                     |
| HAZ    | Environmental Hazards (range 8 -56)         | 32.43 (29.47: 35.39) | 22.97 (20.83: 25.11) | 10.9 (6.97, 14.89)  | <0.001 <sup>1</sup> |
| PUBLIC | Public Acceptance(range 4 –28)              | 15.87 (14.23: 17.50) | 10.67 (9.56:11.77)   | 5.80 (3.69, 7.90)   | <0.001 <sup>2</sup> |
| SD     | Competence (range 4 – 28)                   | 19.75 (18.74:20.77)  | 17.91 (16.52: 18.92) | 1.97 (0.273, 3.68)  | 0.023               |
| OS     | Objective strain (range 11-55)              | 35.03 (32.81: 37.20) | 35.91 (34.08:38.01)  | -0.54 (-3.78, 2.70) | 0.744               |
| SIS    | Subjective Internalised strain (range 6-35) | 22.47 (21.21:23.60)  | 23.63 (22.89:25.03)  | -0.81 (-2.63, 1.00) | 0.380               |
| SES    | Subjective Externalised strain (range 4-20) | 7.74 (7.01: 8.46)    | 7.88 (7.28:8.49)     | -0.34 (-1.37, .69)  | 0.522               |

\*Adjusted for gender, age, location, education

- 1. There was a lesser albeit significant effect of having a dog for parents/guardians whose children attend a special school for children with ASD
- 2. There is no significant difference in ratings of parents/guardians who have a child in a main stream primary school (p=0.09)

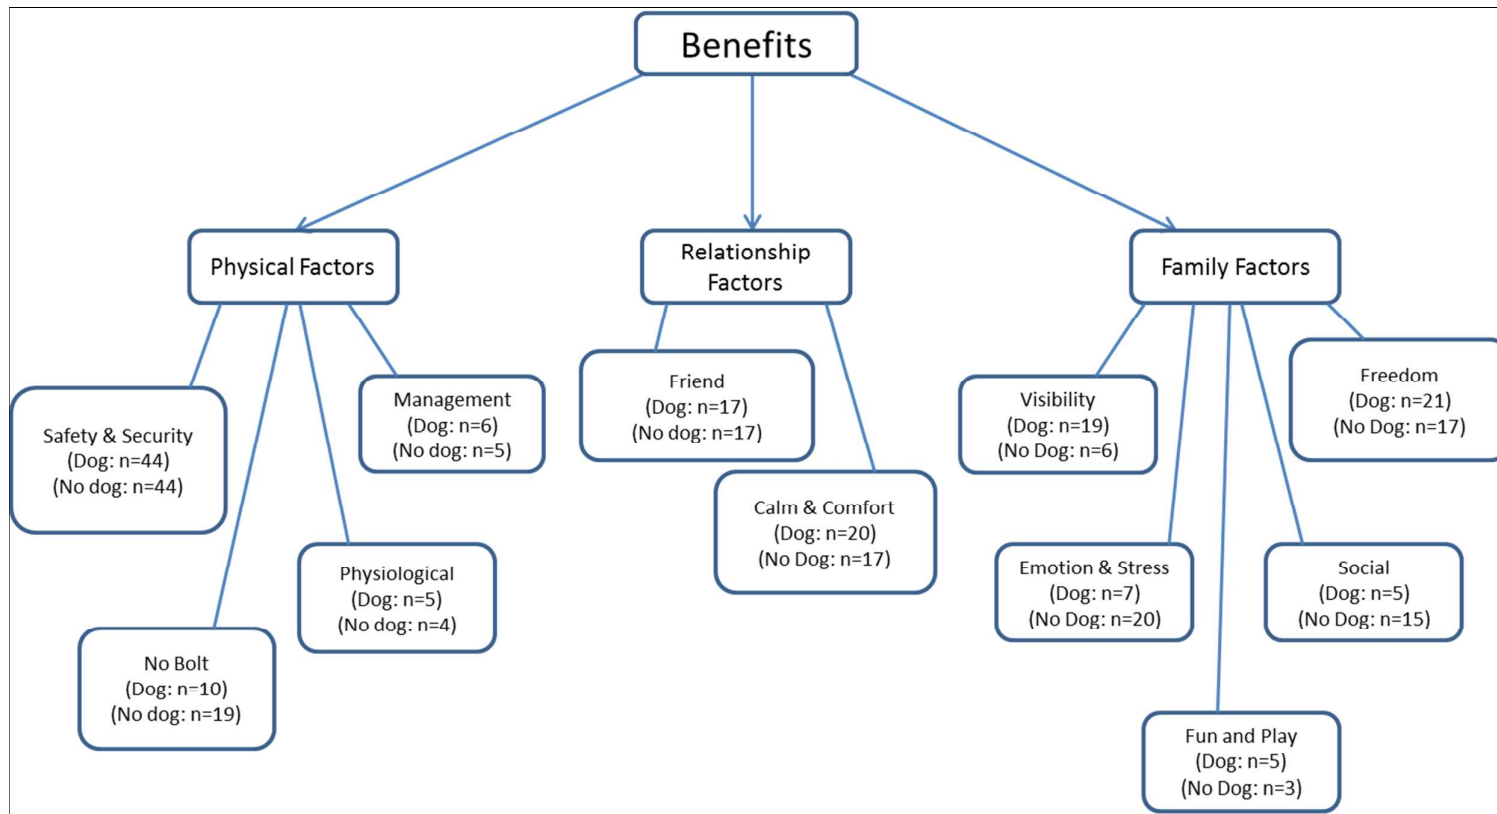

Figure 1 – Parents/Guardians perceived benefits of having an assistance dog (themes and categories)

99% of parents/guardians with a dog listed at least two benefits.

99% of parents/guardians on the wait list for a dog listed at least two benefits.

Category 'Physiological' refers to how assistance dogs can facilitate a child with respect to mobility and ambulation.

Category 'Management' refers to how assistance dogs can facilitate day to day management of their child.

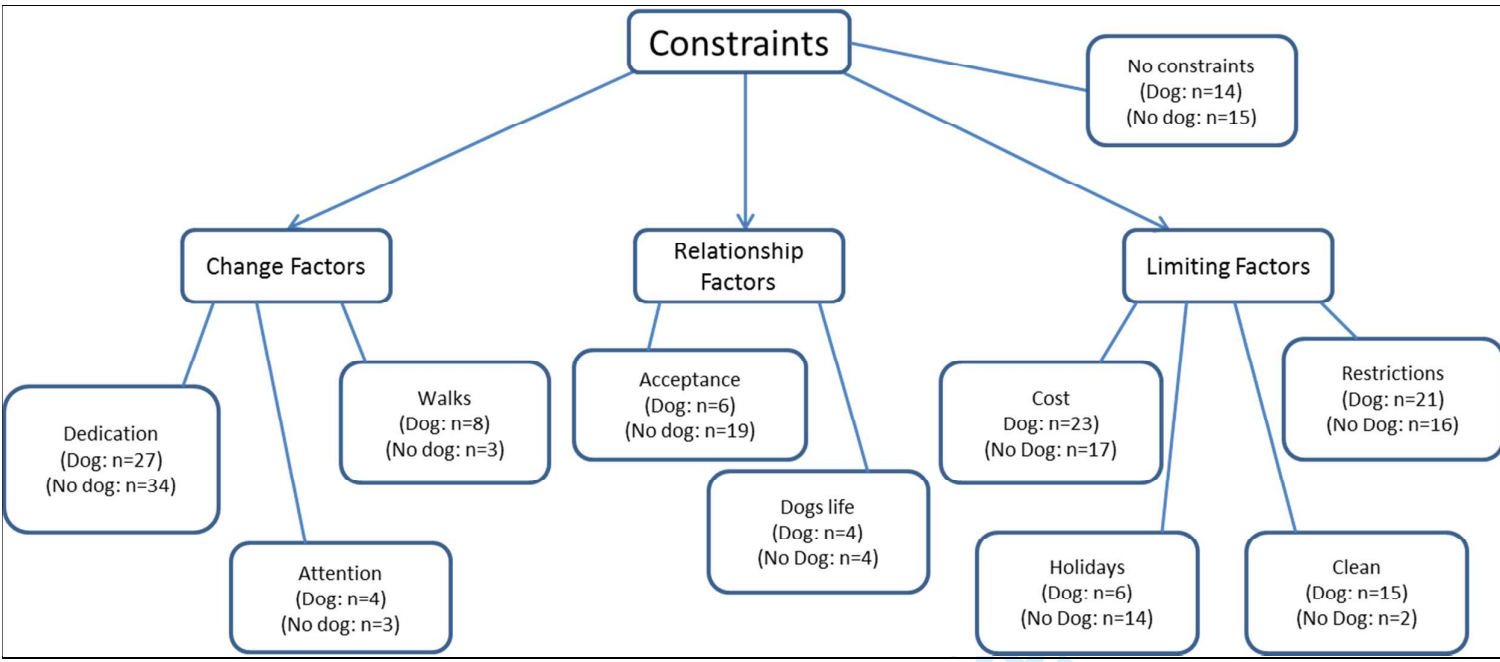

Figure 2 – Parents/Guardians perceived constraints of having assistance dog (themes and categories)

66% of parents/guardians with a dog listed at least two constraints.  
 64% of parents/guardians on the wait list for a dog listed at least two constraints.  
 \*Please note that one category ‘other’ from the waiting list group second constraint is not included in the figure.  
 Category ‘Dogs life’ refers to concerns about what happens when an assistance dog retires/dies.  
 Category ‘Acceptance’ refers to challenges around family and children’s acceptance of an assistance dog.



STROBE Statement—parents perspectives on the value of assistance dogs for children with autism spectrum disorder: a cross sectional study.

|                              | Item No | Recommendation                                                                                                                                                                                                                                                                                                                                                                                                                                                        |
|------------------------------|---------|-----------------------------------------------------------------------------------------------------------------------------------------------------------------------------------------------------------------------------------------------------------------------------------------------------------------------------------------------------------------------------------------------------------------------------------------------------------------------|
| <b>Title and abstract</b>    | 1       | (a) We have indicated the study's design with a commonly used term in the title<br>(b) We have provided in the abstract an informative and balanced summary of what was done and what was found                                                                                                                                                                                                                                                                       |
| <b>Introduction</b>          |         |                                                                                                                                                                                                                                                                                                                                                                                                                                                                       |
| Background/rationale         | 2       | We have explained the scientific background and rationale for the investigation being reported                                                                                                                                                                                                                                                                                                                                                                        |
| Objectives                   | 3       | Specific objectives, including any prespecified hypotheses are stated at end of the introduction                                                                                                                                                                                                                                                                                                                                                                      |
| <b>Methods</b>               |         |                                                                                                                                                                                                                                                                                                                                                                                                                                                                       |
| Study design                 | 4       | We have presented key elements of study design early in the paper – details given in Methods section and at end of Introduction.                                                                                                                                                                                                                                                                                                                                      |
| Setting                      | 5       | We have described the setting, locations, and relevant dates, including periods of recruitment, exposure, follow-up, and data collection                                                                                                                                                                                                                                                                                                                              |
| Participants                 | 6       | <i>Cross-sectional study</i> —We have given the eligibility criteria, and the sources and methods of selection of participants                                                                                                                                                                                                                                                                                                                                        |
| Variables                    | 7       | We have clearly defined all outcomes, exposures, predictors, potential confounders, and effect modifiers.                                                                                                                                                                                                                                                                                                                                                             |
| Data sources/<br>measurement | 8*      | We have provided full descriptions of our measures and assessments in the methods section                                                                                                                                                                                                                                                                                                                                                                             |
| Bias                         | 9       | We have addressed biases in our procedures section and in our regression analysis - adjusting for key demographic variables.                                                                                                                                                                                                                                                                                                                                          |
| Study size                   | 10      | We sampled the total population of users of a national assistance dog's organisation. Explained in Methods section.                                                                                                                                                                                                                                                                                                                                                   |
| Quantitative variables       | 11      | Data management techniques are described in the data analysis section at end of the Methods.                                                                                                                                                                                                                                                                                                                                                                          |
| Statistical methods          | 12      | (a) We have described all statistical methods, including those used to control for confounding – in the Methods section.<br>(b) We have described methods used to examine subgroups and interactions in the Results section.<br>(c) We had minimal missing data.<br><i>Cross-sectional study</i> —we used data analysis techniques appropriate for comparing two independent groups.<br>(e) Describe any sensitivity analyses – we did not do a sensitivity analysis. |

Continued on next page

**Results**

|                  |     |                                                                                                                                                                                                                                                                                                                                                                                                                                                                                      |
|------------------|-----|--------------------------------------------------------------------------------------------------------------------------------------------------------------------------------------------------------------------------------------------------------------------------------------------------------------------------------------------------------------------------------------------------------------------------------------------------------------------------------------|
| Participants     | 13* | (a) We have reported numbers of individuals in our cross sectional study—eg numbers potentially eligible, examined for eligibility, confirmed eligible, included in the study, and analysed<br>(b) We omitted the over tens from our analysis for this study – described in Results section.<br>(c) We have the maximum of 5 tables and figures included – these were considered essential and so we do not have space for a flow diagram. We are happy to provide one if requested. |
| Descriptive data | 14* | (a) We have given characteristics of the study participants (eg demographic, clinical, social) and information on exposures and potential confounders (start of Results section)<br>(b) We had minimal missing data.                                                                                                                                                                                                                                                                 |
| Outcome data     | 15* | <i>Cross-sectional study</i> —We have reported the numbers of outcome events or summary measures in the Results section.                                                                                                                                                                                                                                                                                                                                                             |
| Main results     | 16  | (a) We have given unadjusted and adjusted means and 95% confidence intervals. We have explained the reasons for adjustment in the results section.<br>(b) We did not categorise continuous variables.<br>(c) If relevant, consider translating estimates of relative risk into absolute risk for a meaningful time period – this was not relevant.                                                                                                                                   |
| Other analyses   | 17  | Report other analyses done—eg analyses of subgroups and interactions – main interactions are reported in the Results section and in the Discussion.                                                                                                                                                                                                                                                                                                                                  |

**Discussion**

|                  |    |                                                                                                                                                                                     |
|------------------|----|-------------------------------------------------------------------------------------------------------------------------------------------------------------------------------------|
| Key results      | 18 | We have summarised key results with reference to study objectives                                                                                                                   |
| Limitations      | 19 | We have discussed limitations of the study, taking into account sources of potential bias or imprecision.                                                                           |
| Interpretation   | 20 | We have given a cautious overall interpretation of results considering objectives, limitations, multiplicity of analyses, results from similar studies, and other relevant evidence |
| Generalisability | 21 | We have discussed the generalisability (external validity) of the study results at the end of the Discussion.                                                                       |

**Other information**

|         |    |                                                                                                                                                                                                                                                                                                                 |
|---------|----|-----------------------------------------------------------------------------------------------------------------------------------------------------------------------------------------------------------------------------------------------------------------------------------------------------------------|
| Funding | 22 | This study was not funded from any particular source. It was done at University College Cork and by kind permission of the Irish Guide Dogs for the Blind. They assisted us in contacting their service users. We did not have access to their service users lists. They did not have access to the study data. |
|---------|----|-----------------------------------------------------------------------------------------------------------------------------------------------------------------------------------------------------------------------------------------------------------------------------------------------------------------|

\*Give information separately for cases and controls in case-control studies and, if applicable, for exposed and unexposed groups in cohort and cross-sectional studies.

**Note:** An Explanation and Elaboration article discusses each checklist item and gives methodological background and published examples of transparent reporting. The STROBE checklist is best used in conjunction with this article (freely available on the Web sites of PLoS Medicine at <http://www.plosmedicine.org/>, Annals of Internal Medicine at <http://www.annals.org/>, and Epidemiology at <http://www.epidem.com/>). Information on the STROBE Initiative is available at [www.strobe-statement.org](http://www.strobe-statement.org).

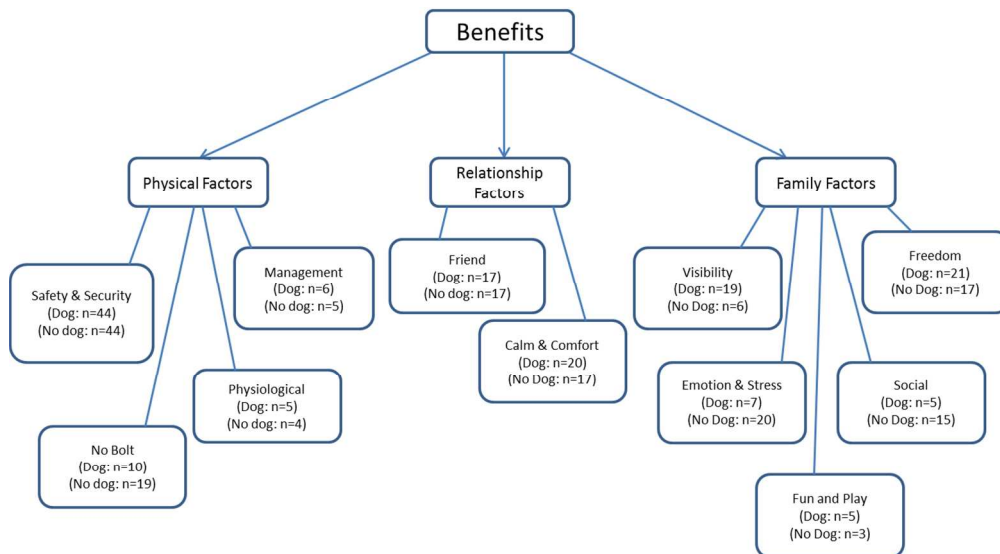

Figure 1 – Parents/Guardians perceived benefits of having an assistance dog (themes and categories)

99% of parents/guardians with a dog listed at least two benefits.

99% of parents/guardians on the wait list for a dog listed at least two benefits.

Category 'Physiological' refers to how assistance dogs can facilitate a child with respect to mobility and ambulation.

Category 'Management' refers to how assistance dogs can facilitate day to day management of their child.

383x211mm (96 x 96 DPI)

Review only

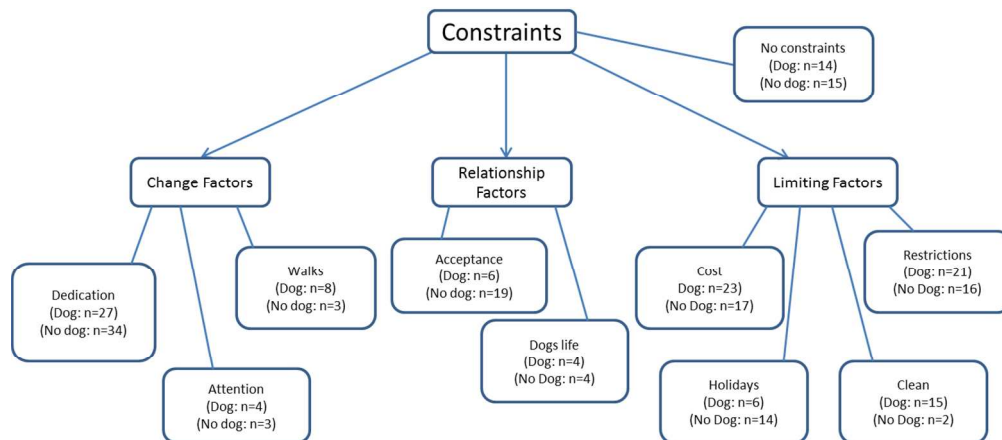

Figure 2 – Parents/Guardians perceived constraints of having assistance dog (themes and categories)

66% of parents/guardians with a dog listed at least two constraints.

64% of parents/guardians on the wait list for a dog listed at least two constraints.

\*Please note that one category 'other' from the waiting list group second constraint is not included in the figure.

Category 'Dogs life' refers to concerns about what happens when an assistance dog retires/dies.  
Category 'Acceptance' refers to challenges around family and children's acceptance of an assistance dog.

383x167mm (96 x 96 DPI)

# BMJ Open

## Parents' perspectives on the value of assistance dogs for children with autism spectrum disorder: a cross sectional study

|                                 |                                                                                                                                                                                                                                                                                                                                                                                                             |
|---------------------------------|-------------------------------------------------------------------------------------------------------------------------------------------------------------------------------------------------------------------------------------------------------------------------------------------------------------------------------------------------------------------------------------------------------------|
| Journal:                        | <i>BMJ Open</i>                                                                                                                                                                                                                                                                                                                                                                                             |
| Manuscript ID:                  | bmjopen-2014-004786.R2                                                                                                                                                                                                                                                                                                                                                                                      |
| Article Type:                   | Research                                                                                                                                                                                                                                                                                                                                                                                                    |
| Date Submitted by the Author:   | 27-May-2014                                                                                                                                                                                                                                                                                                                                                                                                 |
| Complete List of Authors:       | Burgoyne, Louise; University College Cork, Epidemiology & Public Health<br>Dowling, Lisa; University College Cork, School of Medicine<br>Fitzgerald, Anthony; University College Cork, Epidemiology & Public Health<br>Connolly, Micaela; Brothers of Charity,<br>Browne, John; University College Cork, Epidemiology & Public Health<br>Perry, Ivan; University College Cork, Epidemiology & Public Health |
| <b>Primary Subject Heading</b>: | Public health                                                                                                                                                                                                                                                                                                                                                                                               |
| Secondary Subject Heading:      | Epidemiology, Health services research, Public health                                                                                                                                                                                                                                                                                                                                                       |
| Keywords:                       | EPIDEMIOLGY, PUBLIC HEALTH, PRIMARY CARE                                                                                                                                                                                                                                                                                                                                                                    |
|                                 |                                                                                                                                                                                                                                                                                                                                                                                                             |

SCHOLARONE™  
Manuscripts

1  
2  
3  
4  
5  
6  
7  
8 **Parents' perspectives on the value of assistance dogs for children with autism**  
9 **spectrum disorder: a cross sectional study**  
10

11  
12  
13  
14  
15 **Corresponding Author: Louise Burgoyne,**

16 **Institution: Department of Epidemiology & Public Health, University College Cork (UCC).**

17 **Contact: [l.burgoyne@ucc.ie](mailto:l.burgoyne@ucc.ie), ph.: 00-353-4205517, fax: 00-353-214205469.**  
18  
19

20  
21  
22 **Co-authors**

23 **Lisa Dowling, Final Year Medical Student, School of Medicine, UCC**

24 **Anthony Fitzgerald, Biostatistician, Department of Epidemiology & Public Health, UCC**

25 **Micaela Connolly, Psychologist, Brothers of Charity, Cork.**

26 **John Browne, Professor, Department of Epidemiology & Public Health, UCC**

27 **Ivan J Perry, Professor & Head of Department of Epidemiology & Public Health, UCC.**  
28  
29  
30  
31  
32  
33  
34

35 **Key Words**

36 **Public Health, Epidemiology, Autism Spectrum Disorders, Assistance Dogs, animal assisted**  
37 **interventions.**

38  
39  
40 **Word Count Revised Document:**

41 **Abstract = 295 words**

42 **Revised document = 5,056 words (excluding title page, references, tables,**  
43 **figures and bullet pointed strengths and weaknesses)**  
44  
45  
46  
47  
48  
49

50 This research received no specific grant from any funding agency in the public, commercial  
51 or not for profit sector. Technical appendix, statistical code, and dataset available from the  
52 corresponding author at University College Cork, who will provide a permanent home for  
53 the dataset.  
54  
55  
56  
57  
58  
59  
60

**ABSTRACT**

Objectives: Whilst there is an emerging literature on the usefulness of assistance dogs for children with Autism Spectrum Disorder (ASD), there is a dearth of quantitative data on the value of assistance dog interventions for the family unit and family functioning. Using previously validated scales and scales developed specifically for this study, we measured parents/guardians perceptions of having an assistance dog on (a) child safety from environmental dangers, (b) public reception of ASD, (c) levels of caregiver strain and sense of competence. We also obtained open ended response data from parents/guardians on benefits and constraints of having an assistance dog.

Setting: This study was based in the primary care setting, within the context of a specific accredited assistance dog centre in Ireland. Participants: A total of 134 parents/guardians with an assistance dog, and 87 parents of children on the wait list were surveyed.

Primary and Secondary Outcome Measures: The primary outcome measures were scores on environmental hazards and public reception scales. Secondary outcome measures were scores on caregiver strain and competence scales.

Results: Parents/guardians of children who have ASD and an assistance dog rate their child as significantly safer from environmental dangers ( $p < 0.001$ ), perceive that the public act more respectfully and responsibly towards their child ( $p < 0.001$ ), and feel more competent about managing their child ( $p = 0.023$ ) compared to parents on the wait list. There was a concentration of positive feeling towards assistance dog interventions with particular focus on safety and comfort for children, and a sense of freedom from family restrictions associated with ASD. The amount of dedication and commitment required to care for a dog were viewed as the primary constraints.

Conclusions: Our findings indicate that parents perceive that assistance dog interventions can be a valuable intervention for families with children who have ASD.

**Main Strengths and Limitations of this study**

- This study is the first to capture the views of a large group of parents/guardians on an assistance dog intervention.
- Findings suggest that parents perceive a high value in dogs for promoting safety, security and positive public reception for children with ASD.
- This study assessed the perceptions of parents/guardians on the wait list for a dog as opposed to using a stronger randomised control trial (RCT) design, where controls are randomly assigned to another intervention.



## Introduction

There is an expanding literature indicating the human mental and physical health benefits derived from interaction with companion animals.<sup>1</sup> The presence of animals as an intervention tool was first studied by psychotherapist Boris Levinson via a series of case studies.<sup>2</sup> At the time animals were seen as inferior replacements for human social interactions.<sup>3</sup> Since the 1970's animals have been used as a means of improving human physical, emotional, cognitive and social functioning. Animal assisted interventions (AAI) are classified into three groupings; animal assisted activities (AAA), animal assisted therapies (AAT) and service animal programmes (SAP).<sup>4</sup>

Animal assisted activities are delivered by trained personnel in environments such as hospitals and educational settings with an emphasis on quality of life enhancement via recreation and education e.g., therapeutic horse riding to treat populations with physical and mental disabilities.<sup>5-6</sup> Animal assisted therapies are practiced by professionals with individualised therapy goals.<sup>7</sup> The emphasis is on improvements in physical, social and cognitive functioning e.g., an occupational therapist working to facilitate fine motor skills development in a child via a series of structured tasks such as grooming and feeding a cat. A meta-analysis of the literature on AAT has shown that they are associated with moderate effect sizes in improving outcomes in four areas: autism spectrum symptoms, medical difficulties, behavioural problems, and emotional well-being.<sup>8</sup> A recent systematic review of the literature on AAI for ASD has indicated preliminary 'proof of concept', but highlights the needs for more rigorous research to establish a convincing evidence base.<sup>9</sup> This view is

1  
2  
3 upheld by another recent review pointing to the need for better research designs and larger  
4  
5 sample sizes.<sup>10</sup>  
6  
7

8  
9  
10 Service animal interventions (SAP) use dogs to assist people with a disability in performing  
11  
12 daily activities. Service dogs live in-house with the people they work with. Of late  
13  
14 assistance dogs have received growing attention as a means of aiding children with Autism  
15  
16 Spectrum Disorder (ASD) . Qualitative inquiry on the integration of assistance dogs into ten  
17  
18 families with a child who has ASD, showed that the presence of a dog can improve quality of  
19  
20 life for children and parents.<sup>11</sup> A study examining risks and benefits of assistance dogs using  
21  
22 a series of structured interviews with 17 families, reported social and cognitive benefits in  
23  
24 addition to physical and medical benefits.<sup>12</sup> An experimental study which assessed the  
25  
26 effects of assistance dogs on basal salivary cortisol secretion of 42 children with ASD,  
27  
28 demonstrated a reduction in the cortisol awakening response and the number of disruptive  
29  
30 behavioural incidents post introduction of the dog.<sup>13</sup> Assistance dogs complete a unique  
31  
32 triad between parent/guardian and child. Typically the child is attached to the dog via a  
33  
34 lead (leash) and belt. The dog walks with the child but takes commands from the parent  
35  
36 (handler).<sup>14</sup> If the child tries to step off a footpath or attempts to bolt, the dog will use all  
37  
38 his/her power to slow the child down. Assistance dogs prohibit dangerous behaviour such  
39  
40 as elopement (bolting) and provide a calming presence.  
41  
42  
43  
44  
45  
46  
47  
48  
49

50 Elopement or the tendency to 'bolt' is characteristic of ASD. Such behaviour can result in a  
51  
52 child's exposure to dangerous traffic situations or encounters with strangers.<sup>15</sup> Despite  
53  
54 reports of higher mortality rates in ASD populations owing to accidents such as suffocation,  
55  
56 drowning and injuries, research on elopement behaviour is sparse.<sup>16-18</sup> If left untreated  
57  
58  
59  
60

1  
2  
3 elopement may result in the need for a child to be moved to a restrictive setting.<sup>19</sup> In a  
4  
5 systematic review of the literature on current elopement treatments such as function based  
6  
7 interventions, Lang and colleagues conveyed that just two of ten studies examined reported  
8  
9 complete elimination of elopement.<sup>20</sup> Treatments that effectively eliminate elopement  
10  
11 behaviours are warranted.  
12  
13

14  
15  
16  
17 Social, emotional and behavioural challenges at home and in public mean that  
18  
19 parents/guardians of children with ASD experience stress in most areas of their lives.<sup>21-24</sup> In  
20  
21 addition to behaviours such as elopement, public tantrums and the reaction from others are  
22  
23 regarded as being some of the more difficult aspects of a child with ASD's behaviour.  
24  
25

26  
27 Situations can leave parents/guardians feeling judged as 'bad' parents, or feeling like a  
28  
29 failure.<sup>25</sup> In this context assistance dogs can provide a unique support by facilitating child  
30  
31 safety and promoting positive public reception. Outings to public places can become less  
32  
33 stressful and families can enjoy greater freedom and mobility. Given the resource  
34  
35 implications of assistance dog interventions for ASD, there is a need to assess the value of  
36  
37 acceptability and likely uptake of services.  
38  
39

40  
41  
42  
43 Currently there are 188 service animal interventions registered with the standards body  
44  
45 Assistance Dogs International (ADI). These interventions include guide dogs for the blind,  
46  
47 hearing dogs for the hard of hearing, and service dogs for people with other disabilities  
48  
49 including ASD. In this study we measured parents/guardians ratings on: (a) the impact of  
50  
51 having an assistance dog on child safety from environmental hazards, (b) public acceptance  
52  
53 and awareness of ASD, (c) sense of competence with managing a child with ASD and (d)  
54  
55  
56  
57  
58  
59  
60

1  
2  
3 levels of caregiver strain. We also obtained parents/guardians views on the primary  
4  
5 benefits and constraints of having an assistance dog.  
6  
7  
8  
9

## 10 **Methods**

### 11 **Study Design and Participants**

12  
13  
14 Our study was based in the primary care setting, within the context of a specific national  
15  
16 assistance dog intervention in the Republic of Ireland. All children who receive an  
17  
18 assistance dog from this centre have been formally diagnosed with ASD via the Irish Health  
19  
20 Services Executive (HSE) using standard tools such as the ADOS (Autism Diagnostic  
21  
22 Observation Schedule), the ADI-R (Autism Diagnostic Interview) and the DISCO (Diagnostic  
23  
24 Interview for Social Communication). Outside formal diagnosis, certain conditions such  
25  
26 having a child with particularly strong aggression issues may preclude participation on the  
27  
28 assistance dog programme.  
29  
30  
31  
32

33  
34  
35  
36 Parents/guardians with an assistance dog (N=205) and parents/guardians on the waiting list  
37  
38 for an assistance dog (N=107) were eligible to take part in the study. Expedited ethical  
39  
40 approval was granted from the Clinical Research Ethics Committee of the Cork Teaching  
41  
42 Hospitals. Data were gathered between October 2012 and March 2013.  
43  
44  
45  
46  
47

### 48 **Measures**

49  
50 Parents/guardians were asked to complete a four part questionnaire (Table 1). Part one  
51  
52 examined child demographics. Part two measured parents/guardians sense of competence  
53  
54 for managing a child with ASD using Perceived Competence Scales (PCS)<sup>26</sup> ( $\alpha = 0.876$ , 7  
55  
56 point scales: low-high competence). The PCS is a measure of one of three fundamental  
57  
58  
59  
60

1  
2  
3 psychological needs within Self Determination Theory.<sup>27-28</sup> Like other measures within  
4  
5 behavioural change theory, items on the PCS are typically written to be specific to the  
6  
7 relevant behaviour or domain being examined. A sample item from the PCS we used for this  
8  
9 study is 'I am able to do my own routine caring for my child with autism'. Part two also  
10  
11 assessed levels of strain using the Caregiver Strain Questionnaire CGSQ<sup>29</sup> ( $\alpha = 0.940$ , 5 point  
12  
13 scales: low-high strain), which has been validated to assess burden among caregivers of  
14  
15 children with autism.<sup>30</sup> The CGSQ asked participants to consider the past 6 months in terms  
16  
17 of the problems presented by items such as: 'interruption of personal time resulting from  
18  
19 your child's emotional or behavioural problem (Objective Strain)', 'how embarrassed did  
20  
21 you feel about your child's emotional or behavioural problem (Subjective Externalised  
22  
23 Strain)' and 'How worried did you feel about your child's future (Subjective Internalised  
24  
25 Strain)'.  
26  
27  
28  
29  
30  
31  
32

33  
34 Part three of the questionnaire examined perceptions of child safety from environmental  
35  
36 hazards such as traffic, dangerous materials and outdoor spaces ( $\alpha=0.928$ , 7 point scales:  
37  
38 low-high safety/security). Participants were asked to rate how strongly they agreed or  
39  
40 disagreed with respect to their child's safety and security over the past 3 months e.g., 'I am  
41  
42 confident that my child with autism is secure from environmental hazards when we go on  
43  
44 walks in our neighbourhood.' Part three also assessed parents/guardians ratings on the  
45  
46 general public's acceptance of their child ( $\alpha=0.940$ , 7 point scales: low-high acceptance). In  
47  
48 this case participants were asked to rate the public's perception of their child over the past  
49  
50 three months on items such as 'I am sure that people make allowances for my child with  
51  
52 autism when we are in a restaurant'. Scales for part three were developed with reference  
53  
54 to the format and structure of the Neighbourhood Environment Walkability Scale – Youth,<sup>31</sup>  
55  
56  
57  
58  
59  
60

1  
2  
3 and via consultation with parents and author MC, who is a psychologist specialising in  
4  
5 children with ASD. Part four asked participants to list their views of the main  
6  
7 benefits/constraints of having an assistance dog via 'free text'. Those on the waiting list  
8  
9 were asked to give the benefits/constraints that they feel a dog will bring.  
10  
11  
12  
13

### 14 **Pilot**

15  
16  
17 We piloted the questionnaire with eight parents/guardians, four of which have an assistance  
18  
19 dog and four who are on the waiting list. Minor modifications were made to the final  
20  
21 questionnaire on the basis of their responses.  
22  
23  
24  
25

### 26 **Procedures**

27  
28  
29 The primary caregiver from each family with an assistance dog, and each family on the  
30  
31 waiting list received a postal questionnaire from the contact person at the assistance dog  
32  
33 centre. In the interests of confidentiality, the researchers at University College Cork did not  
34  
35 have access to names and addresses of participants. The assistance dog's centre did not  
36  
37 have access to the completed questionnaires. Each questionnaire pack contained a consent  
38  
39 form with study details, a questionnaire, a stamped addressed envelope, and an envelope  
40  
41 marked 'Research'. Participants were requested to place completed questionnaires in the  
42  
43 envelope marked 'Research' and to seal it. They were asked to place the sealed envelope  
44  
45 together with the signed consent form in the stamped addressed envelope, and to post  
46  
47  
48 back to the assistance dog centre. Participants were assured that participation in the study  
49  
50 would have no impact on their status with the centre, and that staff at the centre would  
51  
52 have no access to the survey data.  
53  
54  
55  
56  
57  
58  
59  
60

## Data Analysis

Descriptive statistics are reported using frequencies tables. Chi Square tests were used to test for differences between the categorical demographic variables. T-tests were used to examine differences between parents of children with an assistance dog and those waiting to receive one, within the data on competence, caregiver strain (CGSQ), environmental hazards and public awareness. We then fitted a linear regression that included having a dog or being on the wait list as a dichotomous variable and each of gender, age, home location and education as factors.

Qualitative data were analysed via open coding, followed by a process of categorisation which facilitated the emergence of themes. Author LB analysed the qualitative data initially and author LD completed a second analysis and cross check.

## Results

### Demographics

A total of 134 parents/guardians with an assistance dog (65% response), and 87 parents/guardians from the wait list (81% response) completed the questionnaire. A large proportion of participants with a dog have children over the age of ten (40%) compared to just three participants from the wait list. For this reason we eliminated the 'over tens' from further analysis in this paper.

1  
2  
3 A breakdown of the demographic characteristics of participants' children is in Table 2. A  
4  
5 majority are male (87.5% with dog; 91.7% wait list) and similar percentages have other  
6  
7 medical conditions in addition to ASD (35% with dog; 32.1% wait list). Other conditions  
8  
9 include mild to moderate learning difficulties, ADHD, asthma and epilepsy. The largest  
10  
11 group live in suburban areas (41.3% with dog; 57% wait list) followed by the countryside  
12  
13 (45% with dog; 34% wait list). Over half of the children with a dog are verbal (52.5%) and  
14  
15 under half of those waiting for a dog are verbal (42%). There are differences in types of  
16  
17 school attended between participants whose children have an assistance dog and those  
18  
19 who do not yet have a dog. These are reflective of the remaining age differences between  
20  
21 the two groups post removal of the over tens from the total sample. The main difference is  
22  
23 that 61.3% of children with a dog attend a special school for ASD compared to 35.7% of the  
24  
25 wait list. Conversely 34.5% of children on the wait list are in a special class in a main stream  
26  
27 primary school compared to 21.3% who have a dog.  
28  
29  
30  
31  
32  
33  
34  
35

36 With regard to conventional interventions received there are some descriptive differences  
37  
38 between participants whose children have an assistance dog and those on the wait list for a  
39  
40 dog (Table 2). There is a less than 10% difference between the groups for regular speech  
41  
42 and language therapy (47.5% with dog; 38.1% wait list) and regular occupational therapy  
43  
44 (46.3% with dog; 38.1% wait list). Similar percentages from both groups have a resource  
45  
46 teacher (25% with dog; 26.2% wait list), and there is a 12% difference with regard to special  
47  
48 needs assistants (80% with dog; 67.9% wait list)  
49  
50  
51  
52  
53  
54

55 There are significant differences between profiles of children who have a dog and children  
56  
57 waiting for a dog with respect to age and schooling. There are no significant differences  
58  
59  
60



1  
2  
3 between the groups for other conditions in addition to ASD, whether a child is verbal or  
4  
5 nonverbal, conventional interventions and home location.  
6  
7

### 8 9 10 **Environmental Hazards & Public Awareness**

11  
12 The environmental hazards scales are summarized in Table 3 and details of individual items  
13  
14 are in Supplementary Table 1. Ratings are from low perceived safety to high safety. T-test  
15  
16 results showed that mean ratings are significantly higher ( $p < 0.001$ ) for parents/guardians  
17  
18 whose children have a dog (32.43) than for those on the waiting list (22.97). These  
19  
20 differences remain significant after adjusting for gender, age, home location and school type  
21  
22 ( $p < 0.001$ ). We did however find a significant interaction between school types and  
23  
24 whether children have a dog. Although there are significant differences between the rating  
25  
26 of parents/guardians with a dog and those on the waiting list for children attending a special  
27  
28 school for autism (mean difference=6.62: 95%CI 0.639, 12.61), the effect is not as large as it  
29  
30 is for children attending a primary school (mean difference=12.53: 95%CI 4.16, 20.90) or a  
31  
32 special class in a primary school (mean difference=19.49: 5%CI 13.171, 25.821).  
33  
34  
35  
36  
37  
38  
39

40 The range of scores from the public perception scales (Table 3 and Supplementary Table 2)  
41  
42 are from low to high, with higher scores indicating a perception from parents/guardians that  
43  
44 people act more respectfully and responsibly towards children with ASD when in public  
45  
46 settings. T test results showed that parents/guardians mean ratings are significantly higher  
47  
48 ( $p < 0.001$ ) for those whose children have an assistance dog (15.87) than for the wait list  
49  
50 (10.67). For the most part these differences remain significant after adjusting for gender,  
51  
52 age, home location and education level ( $p < 0.001$ ). However, there was a significant  
53  
54 interaction between type of school attended and whether children have an assistance dog.  
55  
56  
57  
58  
59  
60

1  
2  
3 Although there are significant differences between the ratings of parents/guardians with a  
4  
5 dog and those on the waiting list where their children attend a special school for autism  
6  
7 (mean difference=6.65: 95%CI 3.79, 9.51), and a special class in primary school (mean  
8  
9 difference=7.01: 95%CI 2.88, 11.13), there is no significant difference in the ratings of  
10  
11 parents/guardians who have a child in a main stream primary school (p=0.09).  
12  
13

### 14 15 16 17 **Perceived Competence and Caregiver Strain**

18  
19 A summary of results from parents/guardians perceived competencies with regard to caring  
20  
21 for and managing their child with ASD are in Table 3. Details of individual items are in  
22  
23 Supplementary Table 2. T-test results show that mean scores for parents/guardians whose  
24  
25 children have an assistance dog (19.75), are significantly higher (p=0.  
26  
27 02) in terms of perceived competencies than those on the waiting list (17.91). This  
28  
29 difference remained significant after adjusting for gender, age, home location and education  
30  
31 level (p=0.02). Results from the Caregiver Strain Questionnaire (CGSQ) (Table 3) show that  
32  
33 parents/guardians who have a dog rated slightly lower levels of strain than those on the  
34  
35 wait list. However we found no significant differences between the groups with regard to  
36  
37 any of the individual items on the scales, or the summarized scores for 'objective strain',  
38  
39 'subjective internalized strain', and 'subjective externalized strain'.  
40  
41  
42  
43  
44  
45  
46  
47

### 48 **Benefits and Constraints**

49  
50 Qualitative data were analysed using a thematic approach and constant comparison  
51  
52 techniques by authors LB and LD. Each participant response was reviewed and codes were  
53  
54 assigned to each 'segment of meaning'. Open codes were assigned to representative  
55  
56 categories. The process of coding and categorisation facilitated the emergence of themes  
57  
58  
59  
60

1  
2  
3 from within the data. Initial qualitative analysis was performed by LB, and these results  
4  
5 were cross-checked and refined by LD. We analysed the first and second listed benefits and  
6  
7 constraints of having an assistance dog. Data beyond the first two benefits and constraints  
8  
9 are sparse and not reported.  
10

11  
12  
13  
14 Three themes were identified under 'benefits'. These were; physical factors, relationship  
15  
16 factors and family factors (Figure 1). 'Physical factors' is divided into four categories and  
17  
18 focuses on how assistance dogs can keep a child safe whilst facilitating parents' ability to  
19  
20 manage: *"A sense of security & protection for our daughter especially walking in local*  
21  
22 *environments"* (parent of girl 7-9yo with a dog), *"(Dog) will stop child from bolting from*  
23  
24 *home"* (parent of boy 4-6yo on waiting list). For 3 out of 4 categories, this theme is evenly  
25  
26 dispersed between parents who have a dog and waiting list controls. For the fourth  
27  
28 category 'no bolt', more parents/guardians from the waiting list state the benefit of the dog  
29  
30 being able to stop the child from eloping. 'Relationship factors' is grouped into two  
31  
32 categories and centres on the direct positive relationship between the child with ASD and  
33  
34 his/her assistance dog: *"She is his very best friend"* (parent of boy 4-6yo with a dog), *"It*  
35  
36 *might calm him down instead of him head banging the windows"* (parent of boy 4-6yo on  
37  
38 *waiting list*). The categories making up this theme are almost evenly dispersed between  
39  
40 parents/guardians who have a dog and waiting list controls. 'Family factors' is split into five  
41  
42 categories and is about how day to day family and social life is affected by the introduction  
43  
44 of an assistance dog: *"Ability to do maybe ordinary things and go to ordinary places"* (parent  
45  
46 *of boy 7-9yo on waiting list)*, *"a sense of responsibility, for example he can feed the dog"*  
47  
48 *(parent of boy 4-6yo with a dog)*. There were differences in the dispersal of this theme  
49  
50 among parents/guardians with a dog and those on the waiting list. For example benefits  
51  
52  
53  
54  
55  
56  
57  
58  
59  
60

1  
2  
3 listed by those with a dog formed more of the category 'visibility', which is about public  
4  
5 reception and awareness of ASD. Benefits listed by parents/guardians on the waiting list  
6  
7 formed more of the categories 'social' and 'emotion and stress'. 'Social' is about a child  
8  
9 with ASD's sociability with family and outside the home. 'Emotion and stress' is about levels  
10  
11 of emotion/stress in the family, and to a lesser extent the ability of the child to express  
12  
13 emotion.  
14  
15

16  
17  
18  
19 Four themes emerged from the data on constraints. These were; 'change factors',  
20  
21 'relationship factors', 'limiting factors' and 'no constraints' (Figure 2). Change factors has  
22  
23 three categories and focuses on life style challenges that parents/guardians experience or  
24  
25 anticipate experiencing when they have an assistance dog: *"Its' like an additional child in the*  
26  
27 *family"*(parent of boy 4-6yo with a dog), *"To make time to go for walks everyday"* (parent of  
28  
29 *boy 7-9yo on waiting list*). The categories comprising this theme are quite evenly dispersed  
30  
31 between parents/guardians of children with a dog and those on the waiting list. Slightly  
32  
33 more parents/guardians waiting for a dog list 'dedication', which is the time and effort given  
34  
35 to care for the dog as a main constraint. As with the benefits themes, 'relationship factors'  
36  
37 is about the direct relationship between the child with ASD and the dog: *"My son may not*  
38  
39 *connect with the dog"* (parent of boy 4-6yo on waiting list), *"my concern is when the dog has*  
40  
41 *to retire, how will my child cope?"* (parent of boy 7-9yo with a dog). More  
42  
43  
44  
45  
46  
47 parents/guardians on the waiting list make up the category 'acceptance', which is  
48  
49 concerned about how the dog will be accepted by the child and other family members. The  
50  
51 third theme 'limiting factors' has four associated categories and centres on day to day  
52  
53 constraints of having a dog on family life; *"Extra expense for food, vet bills etc"* (parent of  
54  
55 *boy 7-9yo with a dog*), *"it will be a bit difficult to travel"* (parent of boy 4-6yo on waiting list).  
56  
57  
58  
59  
60

1  
2  
3 There are large differences in the dispersal of two of the categories within this theme. In  
4  
5 particular, more parents/guardians whose children have a dog contributed to the category  
6  
7 'clean' , which is about day to day hygiene activities related to the dog e.g., dog hair in the  
8  
9 house and dealing with dog toileting. More parents/guardians on the waiting list  
10  
11 contributed to a category on 'holidays', which expressed concerns about going on holidays  
12  
13 with the dog. The final theme 'no constraints' has just one category. This was a category in  
14  
15 which parents/guardians stated no issues for concern or anticipated drawbacks; *"There are*  
16  
17 *none....our dog is a valuable and much loved addition to the family"* (parent of boy 7-9yo  
18  
19 *with a dog)*, *"don't anticipate any, feeling very positive about it"* (parent of boy 4-6yo on  
20  
21 *waiting list*). This category was almost evenly dispersed between parents whose children  
22  
23 have a dog and those on the waiting list.  
24  
25  
26  
27  
28  
29  
30

### 31 Discussion

32  
33 Our study is the first to capture the views of a large group of parents/guardians on an  
34  
35 assistance dog intervention. Quantitative findings indicate the value of dogs in promoting  
36  
37 safety, security and positive public reception for children with ASD. They also suggest that  
38  
39 the presence of an assistance dog may make parents/guardians feel more competent with  
40  
41 managing their child. Qualitative findings indicate the role assistance dogs play in  
42  
43 promoting child safety, calmness and provision of friendship. They also highlight the role  
44  
45 the dog has in facilitating 'normal' family functioning, such as being able to visit a shopping  
46  
47 centre. Constraints associated with having a dog relate to specific lifestyle changes  
48  
49 experienced by parents/guardians and the larger family group, such as dedicated care of the  
50  
51 dog.  
52  
53  
54  
55  
56  
57  
58  
59  
60

1  
2  
3 There are several study limitations. Firstly, our findings are based on self-reports and  
4  
5 parents/guardians personal perceptions and are thus subject to participant overestimation,  
6  
7 recall bias and possible subject expectancy effects. Also since we did not include any  
8  
9 objective measures, we cannot know if parents perceptions reflect reality e.g., were  
10  
11 children actually safer and did the public actually view them more positively when  
12  
13 accompanied by an assistance dog. Secondly, there were differences in children's ages and  
14  
15 type of schools attended between our two sample groups which resulted in removal of the  
16  
17 over tens from our analyses and a reduction in sample size. Thirdly we did not assess the  
18  
19 views of parents/guardians who are not registered with the assistance dog centre. Our  
20  
21 results therefore can only be relevant to parents who are open to the possibility of having  
22  
23 an assistance dog. A fourth limitation of the study is that we assessed the perceptions of  
24  
25 waiting list controls as opposed to using a RCT design, where controls are randomly assigned  
26  
27 to another intervention. Ideally we would employ a planned activity, another animal such  
28  
29 as a cat, or a robotic dog as a control. Such a design was not feasible however and the  
30  
31 current data do provide insights.  
32  
33  
34  
35  
36  
37  
38  
39  
40

41 Recognition of the value animal interventions play in promoting human health is gaining  
42  
43 momentum. Animal interventions have been shown to produce increases in self-efficacy  
44  
45 and coping in psychiatric patients<sup>32-33</sup> promote recovery from ill health<sup>34, 3, 35</sup>, and improve  
46  
47 academic performance, adaptive functioning and behavioural/emotional problems with  
48  
49 special education adolescents.<sup>36</sup> Autism spectrum disorder is one of the areas within which  
50  
51 animal interventions have had most success.<sup>8</sup> This is particularly the case for assistance dog  
52  
53 interventions, since dogs not only provide a possible mechanism for promoting  
54  
55 improvements in social and behavioural functioning, they also play a part in control of  
56  
57  
58  
59  
60

1  
2  
3 elopement and promotion of child safety. Once a child is attached to a dog via the leash  
4  
5 and belt system they cannot 'bolt'. In this study parents/guardians with a dog rated their  
6  
7 child as considerably more safe from environmental hazards than did waiting list controls.  
8  
9  
10 We did find a reportable interaction between having an assistance dog, type of school  
11  
12 attended and parents/guardians ratings. This interaction indicated a lesser albeit significant  
13  
14 effect of having a dog for parents/guardians whose children attend a special school for ASD.  
15  
16  
17 The smaller effect may be due to the specific care that children and families receive from  
18  
19 ASD schools. Currently there are no interventions that can successfully eliminate elopement  
20  
21 among children with ASD.<sup>20</sup> Our quantitative findings support the role of assistance dogs in  
22  
23 providing this service. Our qualitative findings provide additional validation with safety and  
24  
25 security being the most frequently stated benefit of having a dog.  
26  
27  
28  
29  
30

31 Behavioural, social and emotional difficulties that encompass the lives of children with ASD  
32  
33 can impact on parents/guardians wellbeing.<sup>21-22</sup> Our findings suggest that assistance dogs  
34  
35 can provide parents/guardians with a higher sense of competency with regard to managing  
36  
37 their child than waiting list controls. This result may reflect added supports dogs provide in  
38  
39 public settings. Indeed public tantrums and reactions from the public are regarded as one  
40  
41 of the more difficult aspects of a child with ASD's behaviour.<sup>25</sup> Qualitative results from this  
42  
43 study highlight the role that an assistance dog has in promoting public awareness and  
44  
45 acceptance of ASD. Quantitative results suggest that parents/guardians whose children  
46  
47 have assistance dogs rate the public's perception of their child as more positive. Our  
48  
49 regression analysis did show an interaction between having an assistance dog and type of  
50  
51 school attended. On examination we found that whilst the ratings of parents/guardians  
52  
53 remained significantly different where their children attend a special school for autism or a  
54  
55  
56  
57  
58  
59  
60

1  
2  
3 special class in primary school, they were not significantly so where children attend a main  
4  
5 stream primary school. Such a result may reflect a lack of awareness/acceptance of ASD in  
6  
7 main stream schools.  
8  
9

10  
11  
12 Our findings from the caregiver strain questionnaire (CSGQ) show no significant differences  
13  
14 between parents/guardians who have a child with a dog, and those waiting to receive a dog.

15  
16 There are three sub scales within the CSGQ. 'Objective strain' deals with the caregiver  
17  
18 burden on day to day tasks related to care, 'subjective internalized strain' deals with  
19  
20 negative feelings internal to the caregiver, and 'subjective externalized strain' deals with  
21  
22 negative feelings by the caregiver towards the child. We considered two reasons which may  
23  
24 explain the lack of any real differences between the groups with regard to caregiver strain.  
25  
26

27  
28 Firstly, it is known that being a parent/guardian of a child with ASD can affect quality of life  
29  
30 with respect to levels of care and support required, and the resulting impacts on family  
31  
32 finance and family time.<sup>37-38</sup> In our study parents/guardians expressed that the dedication  
33  
34 required to care for a dog is a main constraint. Assistance dogs require feeding, exercise,  
35  
36 affection, grooming, regular company and financial expenditure. The added tasks of looking  
37  
38 after an assistance dog may not therefore impact positively upon levels of caregiver strain.  
39  
40

41  
42 Secondly, we noticed that our sample scores on the CSGQ were generally less positive than  
43  
44 scores from parents/guardians who took part in the most recent CSGQ validation study.<sup>30</sup>  
45  
46

47  
48 This may reflect a lower provision of services for families of children with autism in the  
49  
50 Republic of Ireland. It is interesting to note that although there were no significant  
51  
52 differences between parents/guardians who have a dog and those on the wait list for a dog  
53  
54 with respect to caregiver strain, there were significant differences with respect to perceived  
55  
56 competence. Why do parents/guardians with a dog feel more competent but no less  
57  
58  
59  
60



1  
2  
3 strained? A possible explanation is that the process and actual event of getting an  
4  
5 assistance dog, and the specific procedures followed with respect to working with the dog,  
6  
7 may make parents/guardians feel more competent. Having a dog may add more structure  
8  
9 to parent's management technique without necessarily reducing levels of strain associated  
10  
11 with having a child with ASD.  
12  
13

14  
15  
16  
17 The ability of assistance dogs to provide a sense of calm and comfort for children with ASD is  
18  
19 documented.<sup>11, 13</sup> Qualitative results from this study lend support to this view.  
20  
21

22 Parents/guardians with an assistance dog frequently mentioned the dogs' ability to promote  
23  
24 calmness in their child. Those on the waiting list anticipated ways in which the dog would  
25  
26 aid their child in times of distress. Previous research has recognised the role that dogs have  
27  
28 in facilitating social development in children with ASD.<sup>12, 36 & 39</sup> Our qualitative findings  
29  
30 point to the idea that assistance dogs can act as a 'bridge' between children and the physical  
31  
32 and social environment. However, more parents/guardians on the waiting list for a dog  
33  
34 wrote about the anticipated ability of a dog to promote social development in their children  
35  
36 than those with a dog. Those with a dog wrote more about the increased public awareness  
37  
38 and acceptance of their child as a main benefit. It may be that although parents waiting for  
39  
40 a dog anticipate changes in social interaction, this does not emerge as the most important  
41  
42 benefit once they actually get a dog. That assistance dogs may facilitate social interaction in  
43  
44 children with ASD is not in dispute. However, this role may be more salient in animal  
45  
46 assisted therapy (AAT), where a trained therapist may work with a dog to reach specific  
47  
48 cognitive or behavioural goals for a child. Parents/guardians listed constraints of having an  
49  
50 assistance dog were centred on the lifestyle changes. Such changes include the care and  
51  
52 costs required to ensure a dogs' health and wellbeing in addition to the restrictions  
53  
54  
55  
56  
57  
58  
59  
60

1  
2  
3 associated with the dogs' requirements for exercise and companionship. It is important to  
4  
5 recognise that each parent/guardian has a different level of tolerance for specific canine  
6  
7 behaviours.<sup>40</sup> Whilst many of the parents/guardians in our study discounted the constraints  
8  
9 of having a dog, some were explicit about their concerns. More of those with an assistance  
10  
11 dog expressed concern about the increase in housekeeping tasks, and specific hygiene  
12  
13 activities associated with having a dog in the family home. Parents/guardians with children  
14  
15 on the wait list were more concerned about whether the dog will be accepted by the child  
16  
17 and family, and logistics during family holiday time. Our results suggest that some of the  
18  
19 anticipated constraints do not necessarily emerge as the most important constraints once a  
20  
21 dog is placed in the home. Differences in expectations highlight the importance of working  
22  
23 with families to best understand their needs and concerns both before and after obtaining  
24  
25 an assistance dog.  
26  
27  
28  
29  
30  
31  
32

### 33 **Conclusions**

34  
35  
36 Our findings indicate that parents/guardians perceive assistance dog interventions are  
37  
38 valuable in the treatment of ASD, particularly in relation to the control of elopement. They  
39  
40 also perceive that assistance dogs help to promote calmness and provide a source of  
41  
42 comfort for children.  
43  
44  
45  
46  
47  
48  
49  
50  
51  
52  
53  
54  
55  
56  
57  
58  
59  
60

### **Funding Statement**

This research received no specific grant from any funding agency in the public, commercial or not for profit sectors.

### **Competing Interests**

There are no competing interests. This study was an independent University led project. Families with an assistance dog from the Irish Guide Dogs for the Blind, and families on the waiting list for a dog took part in the study.

### **Contributorship Statement**

-Louise Burgoyne was the lead researcher and was involved in the design, implementation, analysis and reporting of the study.

-Lisa Dowling took part of the project as her final year medical project. She was involved in the qualitative analysis and interpretation together with the overall reporting of the study and approval of the manuscript.

-Anthony (Tony) Fitzgerald is the study statistician responsible for interpretation of the quantitative data and final approval of the manuscript.

-Micaela Connolly is a psychologist specializing in children with autism. She was involved in the study design and was clinical adviser to the group throughout the course of research. She was also involved in the study reporting and approval of the manuscript.

-John Browne is a psychologist and health services researcher. He was involved in the study analysis critical review and approval of the manuscript.

-Ivan J Perry was the main project supervisor. He was responsible for overseeing the project from start to finish and approved the final manuscript.

### **Data Sharing Statement**

Technical appendix, statistical code, and dataset available from the corresponding author at University College Cork, who will provide a permanent home for the dataset.

## References

1. O'Haire (2010) Companion animals and human health: Benefits, challenges and the road ahead. *Journal of Veterinary Behaviour* 5, 226-234.
2. Levinson (1969). *Pet-oriented Child Psychotherapy* Springfield Illinois, Charles C Thomas.
3. Endenburg, N. and H. A. van Lith (2011). "The influence of animals on the development of children." *Vet J* 190(2): 208-214.
4. Lasa, S. M., G. Ferriero, et al. (2011). "Animal-assisted interventions in internal and rehabilitation medicine: a review of the recent literature." *Panminerva Medica* 53(2): 129-136.
5. Bass, M., C. Duchowny, et al. (2009). "The Effect of Therapeutic Horseback Riding on Social Functioning in Children with Autism." *Journal of Autism and Developmental Disorders* 39(9): 1261-1267.
6. Kern, J. K., C. L. Fletcher, et al. (2011). "Prospective Trial of Equine-assisted Activities in Autism Spectrum Disorder." *Alternative Therapies in Health and Medicine* 17(3): 14-20.
7. Parish-Plass, N. (2008). "Animal assisted therapy with children suffering from insecure attachment due to abuse and neglect: a method to lower the risk of intergenerational transmission of abuse?" *Clinical Child Psychology and Psychiatry* 13(2): 23.
8. Nimer, B. L. J. (2007). "Animal assisted therapy: a meta analysis." *Anthrozoos* 20: 13.
9. O'Haire, M. E. (2013). Animal-assisted intervention for autism spectrum disorder: A systematic literature review. *Journal of Autism and Developmental Disorders* 43(7): 1606-1622
10. Berry, A., Borgi, M., Francia, N., et al. (2012) Use of assistance and therapy dogs for children with autism spectrum disorders: A critical review of the current evidence. *J Altern Complement Med*, 19(2), 73-80.
11. Burrows, K. E., C. L. Adams, et al. (2008). "Sentinels of Safety: Service Dogs Ensure Safety and Enhance Freedom and Well-Being for Families With Autistic Children." *Qualitative Health Research* 18(12): 1642-1649.
12. Davis, B. W., K. Nattrass, et al. (2004). "Assistance dog placement in the pediatric population: Benefits, risks, and recommendations for future application." *Anthrozoos* 17(2): 130-145.
13. Viau, R., G. Arsenault-Lapierre, et al. (2010). "Effect of service dogs on salivary cortisol secretion in autistic children." *Psychoneuroendocrinology* 35(8): 1187-1193.

14. Burrows, K. E., C. L. Adams, et al. (2008). "Factors affecting behavior and welfare of service dogs for children with autism spectrum disorder." *J Appl Anim Welf Sci* 11(1): 42-62.
15. Piazza, C. C., G. P. Hanley, et al. (1997). "Functional analysis and treatment of elopement." *J Appl Behav Anal* 30(4): 653-672.
16. Shavelle RM, Strauss DJ, Pickett J. Causes of death in autism. *J Autism Dev Disord*. 2001;31(6):569–576
17. McIlwain L, Fournier W. Wandering and autism: the need for data and resources. National Autism Association; 2010. Available at: [http://iacc.hhs.gov/events/2010/slides/fournier\\_mcilwain\\_102210.pdf](http://iacc.hhs.gov/events/2010/slides/fournier_mcilwain_102210.pdf).
- 18 Anderson, C., J. K. Law, et al. (2012). "Occurrence and family impact of elopement in children with autism spectrum disorders." *Pediatrics* 130(5): 870-877.
19. Perrin, C. (2008). "Brief functional analysis and treatment of elopement in preschoolers with autism." *Behavioural Interventions* 23: 8.
20. Lang, R., M. Rispoli, et al. (2009). "Treatment of elopement in individuals with developmental disabilities: a systematic review." *Res Dev Disabil* 30(4): 670-681.
21. Firth, I. and R. Dryer (2013). "The predictors of distress in parents of children with autism spectrum disorder." *J Intellect Dev Disabil* 38(2): 163-171.
22. Seymour M, Wood C, Giallo R, et al. (2013) Fatigue, stress and coping in mothers of children with an autism spectrum disorder *Autism Dev Disord*. Jul;43(7):1547-54
23. de Andrés-García S, Sariñana-González P, Romero-Martínez A, et al. (2013) Cortisol response to stress in caregivers of offspring with autism spectrum disorder is associated with care recipient characteristics. *Stress* 16(5): 510-9
24. Hayes SA, Watson SL. (2013) The impact of parenting stress: a meta-analysis of studies comparing the experience of parenting stress in parents of children with and without autism spectrum disorder. *J Autism Dev Disord* 43 (3): 629-42.
25. Ludlow, A., C. Skelly, et al. (2012). "Challenges faced by parents of children diagnosed with autism spectrum disorder." *J Health Psychol* 17(5): 702-711.
26. Williams, G. C., Freedman, Z.R., & Deci, E. L. (1998). Supporting autonomy to motivate glucose control in patients with diabetes. *Diabetes Care*, 21, 1644-1651
27. Deci, E. L., & Ryan, R. M. (1985). *Intrinsic motivation and self-determination in human behavior*. New York: Plenum.
28. Deci, E. L., & Ryan, R. M. (2000). The "what" and the "why" of goal pursuits: Human needs and the self-determination of behavior. *Psychological Inquiry*, 11, 227-268.

- 1  
2  
3  
4 29. Brannan AM, Heflinger CA and Bickman L (1997) The caregiver strain questionnaire:  
5 measuring the impact on the family of living with a child with serious emotional problems,  
6 *Journal of Emotional and Behavioural Disorders* 5(4): 212-222.  
7  
8  
9 30. Khanna R, Madhavan S, Smith MJ, et al. (2011) Psychometric properties of the Caregiver  
10 Strain Questionnaire (CGSQ) among caregivers of children with autism. *Autism*. 16 (2), 179-  
11 99.  
12  
13 31. Rosenberg D, Ding D, Sallis JF, et al. (2009) Neighborhood Environment Walkability Scale  
14 for Youth (NEWS-Y): reliability and relationship with physical activity. *Prev Med*. 49(2-3):213-  
15 8.  
16  
17  
18 32. Berget B, Ekeberg O, Braastad B (2008) Animal assisted therapy with farm animals for  
19 persons with psychiatric disorders: effects on self efficacy, coping ability and quality of life, a  
20 randomised controlled trial. *Clin Pract Epidemiol Ment Health*, 4: 9.  
21  
22  
23 33. Bizub AL, Joy A, Davidson L. (2003) "It's like being in another world": demonstrating the  
24 benefits of therapeutic horseback riding for individuals with psychiatric disability. *Psychiatr*  
25 *Rehabil J*. 2003 Spring;26(4):377-84.  
26  
27  
28 34. Friedmann, E., & Thomas, S. A. (1995). Pet ownership, social support, and one year  
29 survival after acute myocardial infarction in the cardiac arrhythmia suppression trial (CAST).  
30 *American Journal of Cardiology*, 76, 1213–1217.  
31  
32  
33 35. Morrison, M. L. (2007). Health benefits of animal-assisted interventions. *Complementary*  
34 *Health Practice Review*, 12(1), 51–62.  
35  
36  
37 36. Katcher, A H & Teumer, S P (2006). A four year trial of animal assisted therapy with  
38 public school special education students.. *Handbook on animal assisted therapy: theoretical*  
39 *foundations and guidelines*. Aubrey fine (2<sup>nd</sup> ed) Academic Press San diego.  
40  
41  
42 37. Jarbrink K (2008) The economic consequences of autistic spectrum disorder among  
43 children in a Swedish municipality. *Autism Vol* 11(5) 453–463  
44  
45  
46 38. Cassidy A, McConkey R, Truesdale-Kennedy M et al. Preschoolers with autism spectrum  
47 disorders: the impact on families and the supports available to them. *Early Child*  
48 *Development and Care Vol* 178(2),115–128  
49  
50  
51 39. Solomon O, 2010 What a dog can do: children with autism and therapy dogs in social  
52 interaction. *Journal of the society for psychological anthropology*. 38: 1 143-166.  
53  
54  
55 40. Sanders C R (2004). Excusing tactics: social responses to the public misbehaviour of  
56 companion animals. *Anthrozoos*, 4, 82-90.  
57  
58  
59  
60

Table 1 Questionnaire subsections, details and measures.

| Section                                   | Details                                                                                                                                                                                                                                                                                                                                                                           | Measure                                                                                                                |
|-------------------------------------------|-----------------------------------------------------------------------------------------------------------------------------------------------------------------------------------------------------------------------------------------------------------------------------------------------------------------------------------------------------------------------------------|------------------------------------------------------------------------------------------------------------------------|
| <b>Part 1. Demographics</b>               | <ol style="list-style-type: none"> <li>Gender, age, other medical conditions, age of diagnosis, home location.</li> <li>Education, learning level, verbal/non verbal Interventions and therapies received</li> </ol>                                                                                                                                                              | Tick boxes, yes/no options, free text.                                                                                 |
| <b>Part 2. Parenting &amp; Autism</b>     | <ol style="list-style-type: none"> <li>Perceived competence<br/>From: Self Determination Theory<br/><i>Deci &amp; Ryan (1985 &amp; 2000)</i></li> <li>Caregiver strain questionnaire<br/>From: <i>Brannan et al (1997) &amp; Khanna et al., (2011)</i><br/><i>Objective strain</i><br/><i>Subjective internalised strain</i><br/><i>Subjective externalised strain</i></li> </ol> | <p>Four items on a 7-point scale</p> <p>21 items on a 5 point scale.</p> <p>11 items</p> <p>6 items</p> <p>4 items</p> |
| <b>Part 3. Environment &amp; Public</b>   | <ol style="list-style-type: none"> <li>Environment safety and security<br/>Adapted from scale structures:<br/><i>Rosenberg et al., (2009)</i></li> <li>Public Perception</li> </ol>                                                                                                                                                                                               | <p>Eight items on a 7-point scale.</p> <p>Four items on a 7-point scale.</p>                                           |
| <b>Part 4. Benefits &amp; constraints</b> | <ol style="list-style-type: none"> <li>Benefits of having an assistance dog</li> <li>Constraints of having an assistance dog</li> </ol>                                                                                                                                                                                                                                           | Free text.                                                                                                             |

Table 2 Participant Characteristics (With Dog n=80, Waiting list for Dog n=84)

| <i>Characteristics</i>  |                         | <i>With Dog<br/>N (%)</i> | <i>Waiting for Dog<br/>N (%)</i> | <i>P-value</i> |
|-------------------------|-------------------------|---------------------------|----------------------------------|----------------|
| <b>Gender</b>           | Male                    | 70 (87.5)                 | 77 (91.7)                        | –              |
| <b>Age</b>              | 0-6 years               | 30 (37.5)                 | 60 (71.4)                        | <0.001         |
|                         | 7-9 years               | 50 (62.5)                 | 24 (28.6)                        |                |
| <b>Location</b>         | Town/city centre        | 11 (13.8)                 | 8 (9.0)                          | 0.217          |
|                         | Suburb                  | 33 (41.3)                 | 47 (57.0)                        |                |
|                         | Countryside             | 36 (45.0)                 | 28 (34.0)                        |                |
| <b>Other conditions</b> | Yes                     | 24 (30.0)                 | 27 (32.1)                        | 0.767          |
| <b>Verbal</b>           | Yes                     | 42 (52.5)                 | 35 (42.0)                        | 0.165          |
| <b>Education</b>        | Preschool               | 0                         | 10 (11.9)                        | –              |
|                         | Home tuition            | 1 (1.0)                   | 4 (5.0)                          | –              |
|                         | Primary                 | 13 (16.3)                 | 11 (31.1)                        | 0.025          |
|                         | Special class (Primary) | 17 (21.3)                 | 29 (34.5)                        |                |
|                         | Special school (ASD)    | 49 (61.3)                 | 30 (35.7)                        |                |
| <b>Interventions</b>    | Speech and Language     | 38 (47.5)                 | 32 (38.1)                        | 0.224          |
|                         | Occupational Therapy    | 37 (46.3)                 | 32 (38.1)                        | 0.290          |
|                         | Resource Teacher        | 20 (25.0)                 | 22 (26.2)                        | 0.861          |
|                         | Special Needs Assistant | 64 (80.0)                 | 57 (67.9)                        | 0.077          |

P-values are from valid chi-square tests.

‘–’ Not included in chi-square analysis as numbers do not meet minimum expected count.



Table 3. Summary of results from Environmental Hazards, Public Awareness, Competence and Caregiver Strain scales.

| Item   | Description                                 | Mean (95%CI)         |                      | Diff* (95% CI)      | P-value             |
|--------|---------------------------------------------|----------------------|----------------------|---------------------|---------------------|
|        |                                             | With Dog (n=80)      | Waiting Dog (n=84)   |                     |                     |
| HAZ    | Environmental Hazards (range 8 -56)         | 32.43 (29.47: 35.39) | 22.97 (20.83: 25.11) | 10.9 (6.97, 14.89)  | <0.001 <sup>1</sup> |
| PUBLIC | Public Acceptance(range 4 –28)              | 15.87 (14.23: 17.50) | 10.67 (9.56:11.77)   | 5.80 (3.69, 7.90)   | <0.001 <sup>2</sup> |
| SD     | Competence (range 4 – 28)                   | 19.75 (18.74:20.77)  | 17.91 (16.52: 18.92) | 1.97 (0.273, 3.68)  | 0.023               |
| OS     | Objective strain (range 11-55)              | 35.03 (32.81: 37.20) | 35.91 (34.08:38.01)  | -0.54 (-3.78, 2.70) | 0.744               |
| SIS    | Subjective Internalised strain (range 6-35) | 22.47 (21.21:23.60)  | 23.63 (22.89:25.03)  | -0.81 (-2.63, 1.00) | 0.380               |
| SES    | Subjective Externalised strain (range 4-20) | 7.74 (7.01: 8.46)    | 7.88 (7.28:8.49)     | -0.34 (-1.37, .69)  | 0.522               |

\*Adjusted for gender, age, location, education

1. There was a lesser albeit significant effect of having a dog for parents/guardians whose children attend a special school for children with ASD
2. There is no significant difference in ratings of parents/guardians who have a child in a main stream primary school (p=0.09)

1  
2  
3  
4  
5  
6  
7  
8  
9 **Figure 1** – Parents/Guardians perceived benefits of having an assistance dog (themes and categories)

10  
11 99% of parents/guardians with a dog listed at least two benefits.

12 99% of parents/guardians on the wait list for a dog listed at least two benefits.

13 Category 'Physiological' refers to how assistance dogs can facilitate a child with respect to mobility and ambulation.

14 Category 'Management' refers to how assistance dogs can facilitate day to day management of their child.

15  
16  
17 **Figure 2** – Parents/Guardians perceived constraints of having assistance dog (themes and categories)

18 66% of parents/guardians with a dog listed at least two constraints.

19 64% of parents/guardians on the wait list for a dog listed at least two constraints.

20 \*Please note that one category 'other' from the waiting list group second constraint is not included in the figure.

21 Category 'Dogs life' refers to concerns about what happens when an assistance dog retires/dies.

22 Category 'Acceptance' refers to challenges around family and children's acceptance of an assistance dog.  
23  
24  
25  
26  
27  
28  
29  
30  
31  
32  
33  
34  
35  
36  
37  
38  
39  
40  
41  
42  
43  
44  
45  
46  
47  
48  
49

1  
2  
3  
4  
5  
6  
7  
8 **Parents' perspectives on the value of assistance dogs for children with autism**  
9 **spectrum disorder: a cross sectional study**  
10

11  
12  
13  
14  
15 **Corresponding Author: Louise Burgoyne,**

16 **Institution: Department of Epidemiology & Public Health, University College Cork (UCC).**

17 **Contact: [l.burgoyne@ucc.ie](mailto:l.burgoyne@ucc.ie), ph.: 00-353-4205517, fax: 00-353-214205469.**  
18  
19

20  
21  
22 **Co-authors**

23 **Lisa Dowling, Final Year Medical Student, School of Medicine, UCC**

24 **Anthony Fitzgerald, Biostatistician, Department of Epidemiology & Public Health, UCC**

25 **Micaela Connolly, Psychologist, Brothers of Charity, Cork.**

26 **John Browne, Professor, Department of Epidemiology & Public Health, UCC**

27 **Ivan J Perry, Professor & Head of Department of Epidemiology & Public Health, UCC.**  
28  
29  
30  
31  
32  
33  
34

35 **Key Words**

36 **Public Health, Epidemiology, Autism Spectrum Disorders, Assistance Dogs, animal assisted**  
37 **interventions.**

38 **Word Count Revised Document:**

39 **Abstract = 295 words**

40 **Revised document = 5,056 words (excluding title page, references, tables,**  
41 **figures and bullet pointed strengths and weaknesses)**  
42  
43  
44  
45  
46  
47  
48  
49

50 This research received no specific grant from any funding agency in the public, commercial  
51 or not for profit sector. Technical appendix, statistical code, and dataset available from the  
52 corresponding author at University College Cork, who will provide a permanent home for  
53 the dataset.  
54  
55  
56  
57  
58  
59  
60

### Main Strengths and Limitations of this study

- This study is the first to capture the views of a large group of parents/guardians on an assistance dog intervention.
- Findings suggest that parents perceive a high value in dogs for promoting safety, security and positive public reception for children with ASD.
- This study assessed the perceptions of parents/guardians on the wait list for a dog as opposed to using a stronger randomised control trial (RCT) design, where controls are randomly assigned to another intervention.

### Introduction

There is an expanding literature indicating the human mental and physical health benefits derived from interaction with companion animals.<sup>1</sup> The presence of animals as an intervention tool was first studied by psychotherapist Boris Levinson via a series of case studies.<sup>2</sup> At the time animals were seen as inferior replacements for human social interactions.<sup>3</sup> Since the 1970's animals have been used as a means of improving human physical, emotional, cognitive and social functioning. Animal assisted interventions (AAI) are classified into three groupings; animal assisted activities (AAA), animal assisted therapies (AAT) and service animal programmes (SAP).<sup>4</sup>

Animal assisted activities are delivered by trained personnel in environments such as hospitals and educational settings with an emphasis on quality of life enhancement via recreation and education e.g., therapeutic horse riding to treat populations with physical and mental disabilities.<sup>5-6</sup> Animal assisted therapies are practiced by professionals with

1  
2  
3 individualised therapy goals.<sup>7</sup> The emphasis is on improvements in physical, social and  
4  
5 cognitive functioning e.g., an occupational therapist working to facilitate fine motor skills  
6  
7 development in a child via a series of structured tasks such as grooming and feeding a cat.  
8  
9  
10 A meta-analysis of the literature on AAT has shown that they are associated with moderate  
11  
12 effect sizes in improving outcomes in four areas: autism spectrum symptoms, medical  
13  
14 difficulties, behavioural problems, and emotional well-being.<sup>8</sup> A recent systematic review of  
15  
16 the literature on AAI for ASD has indicated preliminary ‘proof of concept’, but highlights the  
17  
18 needs for more rigorous research to establish a convincing evidence base.<sup>9</sup> This view is  
19  
20 upheld by another recent review pointing to the need for better research designs and larger  
21  
22 sample sizes.<sup>10</sup>  
23  
24  
25  
26  
27  
28

29 Service animal interventions (SAP) use dogs to assist people with a disability in performing  
30  
31 daily activities. Service dogs live in-house with the people they work with. Of late  
32  
33 assistance dogs have received growing attention as a means of aiding children with Autism  
34  
35 Spectrum Disorder (ASD) . Qualitative inquiry on the integration of assistance dogs into ten  
36  
37 families with a child who has ASD, showed that the presence of a dog can improve quality of  
38  
39 life for children and parents.<sup>11</sup> A study examining risks and benefits of assistance dogs using  
40  
41 a series of structured interviews with 17 families, reported social and cognitive benefits in  
42  
43 addition to physical and medical benefits.<sup>12</sup> An experimental study which assessed the  
44  
45 effects of assistance dogs on basal salivary cortisol secretion of 42 children with ASD,  
46  
47 demonstrated a reduction in the cortisol awakening response and the number of disruptive  
48  
49 behavioural incidents post introduction of the dog.<sup>13</sup> Assistance dogs complete a unique  
50  
51 triad between parent/guardian and child. Typically the child is attached to the dog via a  
52  
53 lead (leash) and belt. The dog walks with the child but takes commands from the parent  
54  
55  
56  
57  
58  
59  
60

1  
2  
3 (handler).<sup>14</sup> If the child tries to step off a footpath or attempts to bolt, the dog will use all  
4  
5 his/her power to slow the child down. Assistance dogs prohibit dangerous behaviour such  
6  
7 as elopement (bolting) and provide a calming presence.  
8  
9

10  
11  
12 Elopement or the tendency to 'bolt' is characteristic of ASD. Such behaviour can result in a  
13  
14 child's exposure to dangerous traffic situations or encounters with strangers.<sup>15</sup> Despite  
15  
16 reports of higher mortality rates in ASD populations owing to accidents such as suffocation,  
17  
18 drowning and injuries, research on elopement behaviour is sparse.<sup>16-18</sup> If left untreated  
19  
20 elopement may result in the need for a child to be moved to a restrictive setting.<sup>19</sup> In a  
21  
22 systematic review of the literature on current elopement treatments such as function based  
23  
24 interventions, Lang and colleagues conveyed that just two of ten studies examined reported  
25  
26 complete elimination of elopement.<sup>20</sup> Treatments that effectively eliminate elopement  
27  
28 behaviours are warranted.  
29  
30  
31  
32  
33  
34  
35

36 Social, emotional and behavioural challenges at home and in public mean that  
37  
38 parents/guardians of children with ASD experience stress in most areas of their lives.<sup>21-24</sup> In  
39  
40 addition to behaviours such as elopement, public tantrums and the reaction from others are  
41  
42 regarded as being some of the more difficult aspects of a child with ASD's behaviour.  
43  
44 Situations can leave parents/guardians feeling judged as 'bad' parents, or feeling like a  
45  
46 failure.<sup>25</sup> In this context assistance dogs can provide a unique support by facilitating child  
47  
48 safety and promoting positive public reception. Outings to public places can become less  
49  
50 stressful and families can enjoy greater freedom and mobility. Given the resource  
51  
52 implications of assistance dog interventions for ASD, there is a need to assess the value of  
53  
54 acceptability and likely uptake of services.  
55  
56  
57  
58  
59  
60

1  
2  
3  
4  
5  
6  
7  
8  
9  
10  
11  
12  
13  
14  
15  
16  
17  
18  
19  
20  
21  
22  
23  
24  
25  
26  
27  
28  
29  
30  
31  
32  
33  
34  
35  
36  
37  
38  
39  
40  
41  
42  
43  
44  
45  
46  
47  
48  
49  
50  
51  
52  
53  
54  
55  
56  
57  
58  
59  
60

Currently there are 188 service animal interventions registered with the standards body Assistance Dogs International (ADI). These interventions include guide dogs for the blind, hearing dogs for the hard of hearing, and service dogs for people with other disabilities including ASD. In this study we measured parents/guardians ratings on: (a) the impact of having an assistance dog on child safety from environmental hazards, (b) public acceptance and awareness of ASD, (c) sense of competence with managing a child with ASD and (d) levels of caregiver strain. We also obtained parents/guardians views on the primary benefits and constraints of having an assistance dog.

## Methods

### Study Design and Participants

Our study was based in the primary care setting, within the context of a specific national assistance dog intervention in the Republic of Ireland. All children who receive an assistance dog from this centre have been formally diagnosed with ASD via the Irish Health Services Executive (HSE) using standard tools such as the ADOS (Autism Diagnostic Observation Schedule), the ADI-R (Autism Diagnostic Interview) and the DISCO (Diagnostic Interview for Social Communication). **Outside formal diagnosis, certain conditions such having a child with particularly strong aggression issues may preclude participation on the assistance dog programme.**

Parents/guardians with an assistance dog (N=205) and parents/guardians on the waiting list for an assistance dog (N=107) were eligible to take part in the study. Expedited ethical

1  
2  
3 approval was granted from the Clinical Research Ethics Committee of the Cork Teaching  
4  
5 Hospitals. Data were gathered between October 2012 and March 2013.  
6  
7  
8  
9

## 10 **Measures**

11  
12 Parents/guardians were asked to complete a four part questionnaire (Table 1). Part one  
13  
14 examined child demographics. Part two measured parents/guardians sense of competence  
15  
16 for managing a child with ASD using Perceived Competence Scales (PCS)<sup>26</sup> ( $\alpha = 0.876$ , 7  
17  
18 point scales: low-high competence). The PCS is a measure of one of three fundamental  
19  
20 psychological needs within Self Determination Theory.<sup>27-28</sup> Like other measures within  
21  
22 behavioural change theory, items on the PCS are typically written to be specific to the  
23  
24 relevant behaviour or domain being examined. A sample item from the PCS we used for this  
25  
26 study is 'I am able to do my own routine caring for my child with autism'. Part two also  
27  
28 assessed levels of strain using the Caregiver Strain Questionnaire CGSQ<sup>29</sup> ( $\alpha = 0.940$ , 5 point  
29  
30 scales: low-high strain), which has been validated to assess burden among caregivers of  
31  
32 children with autism.<sup>30</sup> The CGSQ asked participants to consider the past 6 months in terms  
33  
34 of the problems presented by items such as: 'interruption of personal time resulting from  
35  
36 your child's emotional or behavioural problem (Objective Strain)', 'how embarrassed did  
37  
38 you feel about your child's emotional or behavioural problem (Subjective Externalised  
39  
40 Strain)' and 'How worried did you feel about your child's future (Subjective Internalised  
41  
42 Strain)'.  
43  
44  
45  
46  
47  
48  
49  
50  
51  
52

53 Part three of the questionnaire examined perceptions of child safety from environmental  
54  
55 hazards such as traffic, dangerous materials and outdoor spaces ( $\alpha=0.928$ , 7 point scales:  
56  
57 low-high safety/security). Participants were asked to rate how strongly they agreed or  
58  
59  
60



1  
2  
3 disagreed with respect to their child's safety and security over the past 3 months e.g., 'I am  
4  
5 confident that my child with autism is secure from environmental hazards when we go on  
6  
7 walks in our neighbourhood.' Part three also assessed parents/guardians ratings on the  
8  
9 general public's acceptance of their child ( $\alpha=0.940$ , 7 point scales: low-high acceptance). In  
10  
11 this case participants were asked to rate the public's perception of their child over the past  
12  
13 three months on items such as 'I am sure that people make allowances for my child with  
14  
15 autism when we are in a restaurant'. Scales for part three were developed with reference  
16  
17 to the format and structure of the Neighbourhood Environment Walkability Scale – Youth,<sup>31</sup>  
18  
19 and via consultation with parents and author MC, who is a psychologist specialising in  
20  
21 children with ASD. Part four asked participants to list their views of the main  
22  
23 benefits/constraints of having an assistance dog via 'free text'. Those on the waiting list  
24  
25 were asked to give the benefits/constraints that they feel a dog will bring.  
26  
27  
28  
29  
30  
31  
32

### 33 **Pilot**

34  
35 We piloted the questionnaire with eight parents/guardians, four of which have an assistance  
36  
37 dog and four who are on the waiting list. Minor modifications were made to the final  
38  
39 questionnaire on the basis of their responses.  
40  
41  
42  
43  
44

### 45 **Procedures**

46  
47 The primary caregiver from each family with an assistance dog, and each family on the  
48  
49 waiting list received a postal questionnaire from the contact person at the assistance dog  
50  
51 centre. In the interests of confidentiality, the researchers at University College Cork did not  
52  
53 have access to names and addresses of participants. The assistance dog's centre did not  
54  
55 have access to the completed questionnaires. Each questionnaire pack contained a consent  
56  
57  
58  
59  
60

1  
2  
3 form with study details, a questionnaire, a stamped addressed envelope, and an envelope  
4  
5 marked 'Research'. Participants were requested to place completed questionnaires in the  
6  
7 envelope marked 'Research' and to seal it. They were asked to place the sealed envelope  
8  
9 together with the signed consent form in the stamped addressed envelope, and to post  
10  
11 back to the assistance dog centre. Participants were assured that participation in the study  
12  
13 would have no impact on their status with the centre, and that staff at the centre would  
14  
15 have no access to the survey data.  
16  
17  
18  
19  
20

## 21 **Data Analysis**

22  
23 Descriptive statistics are reported using frequencies tables. Chi Square tests were used to  
24  
25 test for differences between the categorical demographic variables. T-tests were used to  
26  
27 examine differences between parents of children with an assistance dog and those waiting  
28  
29 to receive one, within the data on competence, caregiver strain (CGSQ), environmental  
30  
31 hazards and public awareness. We then fitted a linear regression that included having a dog  
32  
33 or being on the wait list as a dichotomous variable and each of gender, age, home location  
34  
35 and education as factors.  
36  
37  
38  
39  
40  
41  
42

43 Qualitative data were analysed via open coding, followed by a process of categorisation  
44  
45 which facilitated the emergence of themes. Author LB analysed the qualitative data initially  
46  
47 and author LD completed a second analysis and cross check.  
48  
49  
50  
51  
52  
53  
54  
55  
56  
57  
58  
59  
60

## Results

### Demographics

A total of 134 parents/guardians with an assistance dog (65% response), and 87 parents/guardians from the wait list (81% response) completed the questionnaire. A large proportion of participants with a dog have children over the age of ten (40%) compared to just three participants from the wait list. For this reason we eliminated the 'over tens' from further analysis in this paper.

A breakdown of the demographic characteristics of participants' children is in Table 2. A majority are male (87.5% with dog; 91.7% wait list) and similar percentages have other medical conditions in addition to ASD (35% with dog; 32.1% wait list). Other conditions include mild to moderate learning difficulties, ADHD, asthma and epilepsy. The largest group live in suburban areas (41.3% with dog; 57% wait list) followed by the countryside (45% with dog; 34% wait list). Over half of the children with a dog are verbal (52.5%) and under half of those waiting for a dog are verbal (42%). There are differences in types of school attended between participants whose children have an assistance dog and those who do not yet have a dog. These are reflective of the remaining age differences between the two groups post removal of the over tens from the total sample. The main difference is that 61.3% of children with a dog attend a special school for ASD compared to 35.7% of the wait list. Conversely 34.5% of children on the wait list are in a special class in a main stream primary school compared to 21.3% who have a dog.

With regard to conventional interventions received there are some descriptive differences between participants whose children have an assistance dog and those on the wait list for a

1  
2  
3 dog (Table 2). There is a less than 10% difference between the groups for regular speech  
4  
5 and language therapy (47.5% with dog; 38.1% wait list) and regular occupational therapy  
6  
7 (46.3% with dog; 38.1% wait list). Similar percentages from both groups have a resource  
8  
9 teacher (25% with dog; 26.2% wait list), and there is a 12% difference with regard to special  
10  
11 needs assistants (80% with dog; 67.9% wait list)  
12  
13

14  
15  
16  
17 There are significant differences between profiles of children who have a dog and children  
18  
19 waiting for a dog with respect to age and schooling. There are no significant differences  
20  
21 between the groups for other conditions in addition to ASD, whether a child is verbal or  
22  
23 nonverbal, conventional interventions and home location.  
24  
25  
26  
27

### 28 29 **Environmental Hazards & Public Awareness**

30  
31 The environmental hazards scales are summarized in Table 3 and details of individual items  
32  
33 are in Supplementary Table 1. Ratings are from low perceived safety to high safety. T-test  
34  
35 results showed that mean ratings are significantly higher ( $p < 0.001$ ) for parents/guardians  
36  
37 whose children have a dog (32.43) than for those on the waiting list (22.97). These  
38  
39 differences remain significant after adjusting for gender, age, home location and school type  
40  
41 ( $p < 0.001$ ). We did however find a significant interaction between school types and  
42  
43 whether children have a dog. Although there are significant differences between the rating  
44  
45 of parents/guardians with a dog and those on the waiting list for children attending a special  
46  
47 school for autism (mean difference=6.62: 95%CI 0.639, 12.61), the effect is not as large as it  
48  
49 is for children attending a primary school (mean difference=12.53: 95%CI 4.16, 20.90) or a  
50  
51 special class in a primary school (mean difference=19.49: 5%CI 13.171, 25.821).  
52  
53  
54  
55  
56  
57  
58  
59  
60

1  
2  
3 The range of scores from the public perception scales (Table 3 and Supplementary Table 2)  
4  
5 are from low to high, with higher scores indicating a perception from parents/guardians that  
6  
7 people act more respectfully and responsibly towards children with ASD when in public  
8  
9 settings. T test results showed that parents/guardians mean ratings are significantly higher  
10  
11 ( $p<0.001$ ) for those whose children have an assistance dog (15.87) than for the wait list  
12  
13 (10.67). For the most part these differences remain significant after adjusting for gender,  
14  
15 age, home location and education level ( $p<0.001$ ). However, there was a significant  
16  
17 interaction between type of school attended and whether children have an assistance dog.  
18  
19 Although there are significant differences between the ratings of parents/guardians with a  
20  
21 dog and those on the waiting list where their children attend a special school for autism  
22  
23 (mean difference=6.65: 95%CI 3.79, 9.51), and a special class in primary school (mean  
24  
25 difference=7.01: 95%CI 2.88, 11.13), there is no significant difference in the ratings of  
26  
27 parents/guardians who have a child in a main stream primary school ( $p=0.09$ ).  
28  
29  
30  
31  
32  
33  
34  
35

### 36 **Perceived Competence and Caregiver Strain**

37  
38 A summary of results from parents/guardians perceived competencies with regard to caring  
39  
40 for and managing their child with ASD are in Table 3. Details of individual items are in  
41  
42 **Supplementary Table 2**. T-test results show that mean scores for parents/guardians whose  
43  
44 children have an assistance dog (19.75), are significantly higher ( $p=0.02$ ) in terms of perceived competencies than those on the waiting list (17.91). This  
45  
46 difference remained significant after adjusting for gender, age, home location and education  
47  
48 level ( $p=0.02$ ). Results from the Caregiver Strain Questionnaire (CGSQ) (Table 3) show that  
49  
50 parents/guardians who have a dog rated slightly lower levels of strain than those on the  
51  
52 wait list. However we found no significant differences between the groups with regard to  
53  
54  
55  
56  
57  
58  
59  
60

1  
2  
3 any of the individual items on the scales, or the summarized scores for 'objective strain',  
4  
5 'subjective internalized strain', and 'subjective externalized strain'.  
6  
7  
8  
9

### 10 **Benefits and Constraints**

11  
12 Qualitative data were analysed using a thematic approach and constant comparison  
13  
14 techniques by authors LB and LD. Each participant response was reviewed and codes were  
15  
16 assigned to each 'segment of meaning'. Open codes were assigned to representative  
17  
18 categories. The process of coding and categorisation facilitated the emergence of themes  
19  
20 from within the data. Initial qualitative analysis was performed by LB, and these results  
21  
22 were cross-checked and refined by LD. We analysed the first and second listed benefits and  
23  
24 constraints of having an assistance dog. Data beyond the first two benefits and constraints  
25  
26 are sparse and not reported.  
27  
28  
29  
30  
31  
32

33  
34 Three themes were identified under 'benefits'. These were; physical factors, relationship  
35  
36 factors and family factors (Figure 1). 'Physical factors' is divided into four categories and  
37  
38 focuses on how assistance dogs can keep a child safe whilst facilitating parents' ability to  
39  
40 manage: *"A sense of security & protection for our daughter especially walking in local*  
41  
42 *environments" (parent of girl 7-9yo with a dog), "(Dog) will stop child from bolting from*  
43  
44 *home" (parent of boy 4-6yo on waiting list). For 3 out of 4 categories, this theme is evenly*  
45  
46 *dispersed between parents who have a dog and waiting list controls. For the fourth*  
47  
48 *category 'no bolt', more parents/guardians from the waiting list state the benefit of the dog*  
49  
50 *being able to stop the child from eloping. 'Relationship factors' is grouped into two*  
51  
52 *categories and centres on the direct positive relationship between the child with ASD and*  
53  
54 *his/her assistance dog: "She is his very best friend" (parent of boy 4-6yo with a dog), "It*  
55  
56  
57  
58  
59  
60

1  
2  
3 *might calm him down instead of him head banging the windows” (parent of boy 4-6yo on*  
4 *waiting list). The categories making up this theme are almost evenly dispersed between*  
5  
6  
7  
8  
9  
10  
11  
12  
13  
14  
15  
16  
17  
18  
19  
20  
21  
22  
23  
24  
25  
26  
27  
28  
29  
30  
31  
32  
33  
34  
35  
36  
37  
38  
39  
40  
41  
42  
43  
44  
45  
46  
47  
48  
49  
50  
51  
52  
53  
54  
55  
56  
57  
58  
59  
60

*parents/guardians who have a dog and waiting list controls. ‘Family factors’ is split into five categories and is about how day to day family and social life is affected by the introduction of an assistance dog: “Ability to do maybe ordinary things and go to ordinary places” (parent of boy 7-9yo on waiting list), “a sense of responsibility, for example he can feed the dog” (parent of boy 4-6yo with a dog). There were differences in the dispersal of this theme among parents/guardians with a dog and those on the waiting list. For example benefits listed by those with a dog formed more of the category ‘visibility’, which is about public reception and awareness of ASD. Benefits listed by parents/guardians on the waiting list formed more of the categories ‘social’ and ‘emotion and stress’. ‘Social’ is about a child with ASD’s sociability with family and outside the home. ‘Emotion and stress’ is about levels of emotion/stress in the family, and to a lesser extent the ability of the child to express emotion.*

Four themes emerged from the data on constraints. These were; ‘change factors’, ‘relationship factors’, ‘limiting factors’ and ‘no constraints’ (Figure 2). Change factors has three categories and focuses on life style challenges that parents/guardians experience or anticipate experiencing when they have an assistance dog: *“Its’ like an additional child in the family”(parent of boy 4-6yo with a dog), “To make time to go for walks everyday” (parent of boy 7-9yo on waiting list). The categories comprising this theme are quite evenly dispersed between parents/guardians of children with a dog and those on the waiting list. Slightly more parents/guardians waiting for a dog list ‘dedication’, which is the time and effort given to care for the dog as a main constraint. As with the benefits themes, ‘relationship factors’*

1  
2  
3 is about the direct relationship between the child with ASD and the dog: *“My son may not*  
4 *connect with the dog” (parent of boy 4-6yo on waiting list), “my concern is when the dog has*  
5 *to retire, how will my child cope?” (parent of boy 7-9yo with a dog). More*  
6  
7  
8  
9  
10 parents/guardians on the waiting list make up the category ‘acceptance’, which is  
11  
12 concerned about how the dog will be accepted by the child and other family members. The  
13  
14 third theme ‘limiting factors’ has four associated categories and centres on day to day  
15  
16 constraints of having a dog on family life; *“Extra expense for food, vet bills etc” (parent of*  
17 *boy 7-9yo with a dog), “it will be a bit difficult to travel” (parent of boy 4-6yo on waiting list).*  
18  
19  
20  
21  
22 There are large differences in the dispersal of two of the categories within this theme. In  
23  
24 particular, more parents/guardians whose children have a dog contributed to the category  
25  
26 ‘clean’, which is about day to day hygiene activities related to the dog e.g., dog hair in the  
27  
28 house and dealing with dog toileting. More parents/guardians on the waiting list  
29  
30 contributed to a category on ‘holidays’, which expressed concerns about going on holidays  
31  
32 with the dog. The final theme ‘no constraints’ has just one category. This was a category in  
33  
34 which parents/guardians stated no issues for concern or anticipated drawbacks; *“There are*  
35 *none....our dog is a valuable and much loved addition to the family” (parent of boy 7-9yo*  
36 *with a dog), “don’t anticipate any, feeling very positive about it” (parent of boy 4-6yo on*  
37 *waiting list).* This category was almost evenly dispersed between parents whose children  
38  
39  
40  
41  
42  
43  
44  
45  
46  
47  
48  
49  
50  
51  
52  
53  
54  
55  
56  
57  
58  
59  
60

## Discussion

Our study is the first to capture the views of a large group of parents/guardians on an assistance dog intervention. Quantitative findings indicate the value of dogs in promoting safety, security and positive public reception for children with ASD. They also suggest that



1  
2  
3 the presence of an assistance dog may make parents/guardians feel more competent with  
4  
5 managing their child. Qualitative findings indicate the role assistance dogs play in  
6  
7 promoting child safety, calmness and provision of friendship. They also highlight the role  
8  
9 the dog has in facilitating 'normal' family functioning, such as being able to visit a shopping  
10  
11 centre. Constraints associated with having a dog relate to specific lifestyle changes  
12  
13 experienced by parents/guardians and the larger family group, such as dedicated care of the  
14  
15 dog.  
16  
17  
18  
19

20  
21  
22 There are several study limitations. Firstly, our findings are based on self-reports and  
23  
24 parents/guardians personal perceptions and are thus subject to participant overestimation,  
25  
26 recall bias and possible subject expectancy effects. Also since we did not include any  
27  
28 objective measures, we cannot know if parents perceptions reflect reality e.g., were  
29  
30 children actually safer and did the public actually view them more positively when  
31  
32 accompanied by an assistance dog. Secondly, there were differences in children's ages and  
33  
34 type of schools attended between our two sample groups which resulted in removal of the  
35  
36 over tens from our analyses and a reduction in sample size. Thirdly we did not assess the  
37  
38 views of parents/guardians who are not registered with the assistance dog centre. Our  
39  
40 results therefore can only be relevant to parents who are open to the possibility of having  
41  
42 an assistance dog. A fourth limitation of the study is that we assessed the perceptions of  
43  
44 waiting list controls as opposed to using a RCT design, where controls are randomly assigned  
45  
46 to another intervention. Ideally we would employ a planned activity, another animal such  
47  
48 as a cat, or a robotic dog as a control. Such a design was not feasible however and the  
49  
50 current data do provide insights.  
51  
52  
53  
54  
55  
56  
57  
58  
59  
60

1  
2  
3 Recognition of the value animal interventions play in promoting human health is gaining  
4  
5 momentum. Animal interventions have been shown to produce increases in self-efficacy  
6  
7 and coping in psychiatric patients<sup>32-33</sup> promote recovery from ill health<sup>34, 3, 35</sup>, and improve  
8  
9 academic performance, adaptive functioning and behavioural/emotional problems with  
10  
11 special education adolescents.<sup>36</sup> Autism spectrum disorder is one of the areas within which  
12  
13 animal interventions have had most success.<sup>8</sup> This is particularly the case for assistance dog  
14  
15 interventions, since dogs not only provide a possible mechanism for promoting  
16  
17 improvements in social and behavioural functioning, they also play a part in control of  
18  
19 elopement and promotion of child safety. Once a child is attached to a dog via the leash  
20  
21 and belt system they cannot 'bolt'. In this study parents/guardians with a dog rated their  
22  
23 child as considerably more safe from environmental hazards than did waiting list controls.  
24  
25 We did find a reportable interaction between having an assistance dog, type of school  
26  
27 attended and parents/guardians ratings. This interaction indicated a lesser albeit significant  
28  
29 effect of having a dog for parents/guardians whose children attend a special school for ASD.  
30  
31 The smaller effect may be due to the specific care that children and families receive from  
32  
33 ASD schools. Currently there are no interventions that can successfully eliminate elopement  
34  
35 among children with ASD.<sup>20</sup> Our quantitative findings support the role of assistance dogs in  
36  
37 providing this service. Our qualitative findings provide additional validation with safety and  
38  
39 security being the most frequently stated benefit of having a dog.  
40  
41  
42  
43  
44  
45  
46  
47  
48  
49

50 Behavioural, social and emotional difficulties that encompass the lives of children with ASD  
51  
52 can impact on parents/guardians wellbeing.<sup>21-22</sup> Our findings suggest that assistance dogs  
53  
54 can provide parents/guardians with a higher sense of competency with regard to managing  
55  
56 their child than waiting list controls. This result may reflect added supports dogs provide in  
57  
58  
59  
60

1  
2  
3 public settings. Indeed public tantrums and reactions from the public are regarded as one  
4  
5 of the more difficult aspects of a child with ASD's behaviour.<sup>25</sup> Qualitative results from this  
6  
7 study highlight the role that an assistance dog has in promoting public awareness and  
8  
9 acceptance of ASD. Quantitative results suggest that parents/guardians whose children  
10  
11 have assistance dogs rate the public's perception of their child as more positive. Our  
12  
13 regression analysis did show an interaction between having an assistance dog and type of  
14  
15 school attended. On examination we found that whilst the ratings of parents/guardians  
16  
17 remained significantly different where their children attend a special school for autism or a  
18  
19 special class in primary school, they were not significantly so where children attend a main  
20  
21 stream primary school. Such a result may reflect a lack of awareness/acceptance of ASD in  
22  
23 main stream schools.  
24  
25  
26  
27  
28  
29  
30

31 Our findings from the caregiver strain questionnaire (CSGQ) show no significant differences  
32  
33 between parents/guardians who have a child with a dog, and those waiting to receive a dog.  
34  
35 There are three sub scales within the CSGQ. 'Objective strain' deals with the caregiver  
36  
37 burden on day to day tasks related to care, 'subjective internalized strain' deals with  
38  
39 negative feelings internal to the caregiver, and 'subjective externalized strain' deals with  
40  
41 negative feelings by the caregiver towards the child. We considered two reasons which may  
42  
43 explain the lack of any real differences between the groups with regard to caregiver strain.  
44  
45 Firstly, it is known that being a parent/guardian of a child with ASD can affect quality of life  
46  
47 with respect to levels of care and support required, and the resulting impacts on family  
48  
49 finance and family time.<sup>37-38</sup> In our study parents/guardians expressed that the dedication  
50  
51 required to care for a dog is a main constraint. Assistance dogs require feeding, exercise,  
52  
53 affection, grooming, regular company and financial expenditure. The added tasks of looking  
54  
55  
56  
57  
58  
59  
60

1  
2  
3 after an assistance dog may not therefore impact positively upon levels of caregiver strain.

4  
5 Secondly, we noticed that our sample scores on the CSGQ were generally less positive than  
6  
7 scores from parents/guardians who took part in the most recent CSGQ validation study.<sup>30</sup>

8  
9 This may reflect a lower provision of services for families of children with autism in the  
10  
11 Republic of Ireland. It is interesting to note that although there were no significant  
12  
13 differences between parents/guardians who have a dog and those on the wait list for a dog  
14  
15 with respect to caregiver strain, there were significant differences with respect to perceived  
16  
17 competence. Why do parents/guardians with a dog feel more competent but no less  
18  
19 strained? A possible explanation is that the process and actual event of getting an  
20  
21 assistance dog, and the specific procedures followed with respect to working with the dog,  
22  
23 may make parents/guardians feel more competent. Having a dog may add more structure  
24  
25 to parent's management technique without necessarily reducing levels of strain associated  
26  
27 with having a child with ASD.  
28  
29  
30  
31  
32  
33  
34  
35

36 The ability of assistance dogs to provide a sense of calm and comfort for children with ASD is  
37  
38 documented.<sup>11, 13</sup> Qualitative results from this study lend support to this view.

39  
40 Parents/guardians with an assistance dog frequently mentioned the dogs' ability to promote  
41  
42 calmness in their child. Those on the waiting list anticipated ways in which the dog would  
43  
44 aid their child in times of distress. Previous research has recognised the role that dogs have  
45  
46 in facilitating social development in children with ASD.<sup>12, 36 & 39</sup> Our qualitative findings  
47  
48 point to the idea that assistance dogs can act as a 'bridge' between children and the physical  
49  
50 and social environment. However, more parents/guardians on the waiting list for a dog  
51  
52 wrote about the anticipated ability of a dog to promote social development in their children  
53  
54 than those with a dog. Those with a dog wrote more about the increased public awareness  
55  
56  
57  
58  
59  
60

1  
2  
3 and acceptance of their child as a main benefit. It may be that although parents waiting for  
4  
5 a dog anticipate changes in social interaction, this does not emerge as the most important  
6  
7 benefit once they actually get a dog. That assistance dogs may facilitate social interaction in  
8  
9 children with ASD is not in dispute. However, this role may be more salient in animal  
10  
11 assisted therapy (AAT), where a trained therapist may work with a dog to reach specific  
12  
13 cognitive or behavioural goals for a child. Parents/guardians listed constraints of having an  
14  
15 assistance dog were centred on the lifestyle changes. Such changes include the care and  
16  
17 costs required to ensure a dogs' health and wellbeing in addition to the restrictions  
18  
19 associated with the dogs' requirements for exercise and companionship. It is important to  
20  
21 recognise that each parent/guardian has a different level of tolerance for specific canine  
22  
23 behaviours.<sup>40</sup> Whilst many of the parents/guardians in our study discounted the constraints  
24  
25 of having a dog, some were explicit about their concerns. More of those with an assistance  
26  
27 dog expressed concern about the increase in housekeeping tasks, and specific hygiene  
28  
29 activities associated with having a dog in the family home. Parents/guardians with children  
30  
31 on the wait list were more concerned about whether the dog will be accepted by the child  
32  
33 and family, and logistics during family holiday time. Our results suggest that some of the  
34  
35 anticipated constraints do not necessarily emerge as the most important constraints once a  
36  
37 dog is placed in the home. Differences in expectations highlight the importance of working  
38  
39 with families to best understand their needs and concerns both before and after obtaining  
40  
41 an assistance dog.  
42  
43  
44  
45  
46  
47  
48  
49  
50  
51  
52  
53  
54  
55  
56  
57  
58  
59  
60

## Conclusions

Our findings indicate that parents/guardians perceive assistance dog interventions are valuable in the treatment of ASD, particularly in relation to the control of elopement. They also perceive that assistance dogs help to promote calmness and provide a source of comfort for children.

## Funding Statement

This research received no specific grant from any funding agency in the public, commercial or not for profit sectors.

## References

1. O'Haire (2010) Companion animals and human health: Benefits, challenges and the road ahead. *Journal of Veterinary Behaviour* 5, 226-234.
2. Levinson (1969). *Pet-oriented Child Psychotherapy* Springfield Illinois, Charles C Thomas.
3. Endenburg, N. and H. A. van Lith (2011). "The influence of animals on the development of children." *Vet J* 190(2): 208-214.
4. Lasa, S. M., G. Ferriero, et al. (2011). "Animal-assisted interventions in internal and rehabilitation medicine: a review of the recent literature." *Panminerva Medica* 53(2): 129-136.
5. Bass, M., C. Duchowny, et al. (2009). "The Effect of Therapeutic Horseback Riding on Social Functioning in Children with Autism." *Journal of Autism and Developmental Disorders* 39(9): 1261-1267.
6. Kern, J. K., C. L. Fletcher, et al. (2011). "Prospective Trial of Equine-assisted Activities in Autism Spectrum Disorder." *Alternative Therapies in Health and Medicine* 17(3): 14-20.
7. Parish-Plass, N. (2008). "Animal assisted therapy with children suffering from insecure attachment due to abuse and neglect: a method to lower the risk of intergenerational transmission of abuse?" *Clinical Child Psychology and Psychiatry* 13(2): 23.
8. Nimer, B. L. J. (2007). "Animal assisted therapy: a meta analysis." *Anthrozoos* 20: 13.

- 1  
2  
3 9. O'Haire, M. E. (2013). Animal-assisted intervention for autism spectrum disorder: A  
4 systematic literature review. *Journal of Autism and Developmental Disorders* 43(7): 1606-  
5 1622  
6
- 7  
8 10 Berry , A., Borgi, M., Francia., N., Alleva E., Cirulli, F (2012) Use of assistance and therapy  
9 dogs for children with autism spectrum disorders: A critical review of the current evidence. *J*  
10 *Altern Complement Med*, 19(2), 73-80.  
11
- 12 11. Burrows, K. E., C. L. Adams, et al. (2008). "Sentinels of Safety: Service Dogs Ensure Safety  
13 and Enhance Freedom and Well-Being for Families With Autistic Children." *Qualitative*  
14 *Health Research* 18(12): 1642-1649.  
15
- 16 12. Davis, B. W., K. Nattrass, et al. (2004). "Assistance dog placement in the pediatric  
17 population: Benefits, risks, and recommendations for future application." *Anthrozoos* 17(2):  
18 130-145.  
19
- 20 13. Viau, R., G. Arsenault-Lapierre, et al. (2010). "Effect of service dogs on salivary cortisol  
21 secretion in autistic children." *Psychoneuroendocrinology* 35(8): 1187-1193.  
22
- 23 14. Burrows, K. E., C. L. Adams, et al. (2008). "Factors affecting behavior and welfare of  
24 service dogs for children with autism spectrum disorder." *J Appl Anim Welf Sci* 11(1): 42-62.  
25
- 26 15. Piazza, C. C., G. P. Hanley, et al. (1997). "Functional analysis and treatment of  
27 elopement." *J Appl Behav Anal* 30(4): 653-672.  
28
- 29 16. Shavelle RM, Strauss DJ, Pickett J. Causes of death in autism. *J Autism Dev Disord*.  
30 2001;31(6):569–576  
31
- 32 17. McIlwain L, Fournier W. Wandering and autism: the need for data and resources.  
33 National Autism Association; 2010. Available at: [http://iacc.hhs.gov/events/2010/slides](http://iacc.hhs.gov/events/2010/slides_fournier_mcilwain_102210.pdf)  
34 [fournier\\_mcilwain\\_102210.pdf](http://iacc.hhs.gov/events/2010/slides_fournier_mcilwain_102210.pdf).  
35
- 36 18 Anderson, C., J. K. Law, et al. (2012). "Occurrence and family impact of elopement in  
37 children with autism spectrum disorders." *Pediatrics* 130(5): 870-877.  
38
- 39 19. Perrin, C. (2008). "Brief functional analysis and treatment of elopement in preschoolers  
40 with autism." *Behavioural Interventions* 23: 8.  
41
- 42 20. Lang, R., M. Rispoli, et al. (2009). "Treatment of elopement in individuals with  
43 developmental disabilities: a systematic review." *Res Dev Disabil* 30(4): 670-681.  
44
- 45 21. Firth, I. and R. Dryer (2013). "The predictors of distress in parents of children with autism  
46 spectrum disorder." *J Intellect Dev Disabil* 38(2): 163-171.  
47
- 48 22. Seymour M, Wood C, Giallo R, Jellett R J (2013) Fatigue, stress and coping in mothers of  
49 children with an autism spectrum disorder *Autism Dev Disord*. Jul;43(7):1547-54  
50  
51  
52  
53  
54  
55  
56  
57  
58  
59  
60

- 1  
2  
3 23. de Andrés-García S, Sariñana-González P, Romero-Martínez A, Moya-Albiol L, Gonzalez-  
4 Bono E. (2013) Cortisol response to stress in caregivers of offspring with autism spectrum  
5 disorder is associated with care recipient characteristics. *Stress* 16(5): 510-9  
6  
7  
8 24. Hayes SA, Watson SL. (2013) The impact of parenting stress: a meta-analysis of studies  
9 comparing the experience of parenting stress in parents of children with and without autism  
10 spectrum disorder. *J Autism Dev Disord* 43 (3): 629-42.  
11  
12  
13 25. Ludlow, A., C. Skelly, et al. (2012). "Challenges faced by parents of children diagnosed  
14 with autism spectrum disorder." *J Health Psychol* 17(5): 702-711.  
15  
16 26. Williams, G. C., Freedman, Z.R., & Deci, E. L. (1998). Supporting autonomy to motivate  
17 glucose control in patients with diabetes. *Diabetes Care*, 21, 1644-1651  
18  
19  
20 27. Deci, E. L., & Ryan, R. M. (1985). *Intrinsic motivation and self-determination in human*  
21 *behavior*. New York: Plenum.  
22  
23 28. Deci, E. L., & Ryan, R. M. (2000). The "what" and the "why" of goal pursuits: Human  
24 needs and the self-determination of behavior. *Psychological Inquiry*, 11, 227-268.  
25  
26  
27 29. Brannan AM, Heflinger CA and Bickman L (1997) The caregiver strain questionnaire:  
28 measuring the impact on the family of living with a child with serious emotional problems,  
29 *Journal of Emotional and Behavioural Disorders* 5(4): 212-222.  
30  
31 30. Khanna R, Madhavan S, Smith MJ, Tworek C, Patrick JH, Becker-Cottrill B. (2011)  
32 Psychometric properties of the Caregiver Strain Questionnaire (CGSQ) among caregivers of  
33 children with autism. *Autism*. 16 (2), 179-99.  
34  
35  
36 31. Rosenberg D, Ding D, Sallis JF, Kerr J, Norman GJ, Durant N, Harris SK, Saelens BE (2009)  
37 Neighborhood Environment Walkability Scale for Youth (NEWS-Y): reliability and  
38 relationship with physical activity. *Prev Med*. 49(2-3):213-8.  
39  
40  
41 32. Berget B, Ekeberg O, Braastad B (2008) Animal assisted therapy with farm animals for  
42 persons with psychiatric disorders: effects on self efficacy, coping ability and quality of life, a  
43 randomised controlled trial. *Clin Pract Epidemiol Ment Health*, 4: 9.  
44  
45  
46 33. Bizub AL, Joy A, Davidson L. (2003) "It's like being in another world": demonstrating the  
47 benefits of therapeutic horseback riding for individuals with psychiatric disability. *Psychiatr*  
48 *Rehabil J*. 2003 Spring;26(4):377-84.  
49  
50  
51 34. Friedmann, E., & Thomas, S. A. (1995). Pet ownership, social support, and one year  
52 survival after acute myocardial infarction in the cardiac arrhythmia suppression trial (CAST).  
53 *American Journal of Cardiology*, 76, 1213–1217.  
54  
55  
56 35. Morrison, M. L. (2007). Health benefits of animal-assisted interventions. *Complementary*  
57 *Health Practice Review*, 12(1), 51–62.  
58  
59  
60



1  
2  
3 36. Katcher, A H & Teumer, S P (2006). A four year trial of animal assisted therapy with  
4 public school special education students.. Handbook on animal assisted therapy: theoretical  
5 foundations and guidelines. Aubrey fine (2<sup>nd</sup> ed) Academic Press San diego.  
6

7  
8 37. Jarbrink K (2008) The economic consequences of autistic spectrum disorder among  
9 children in a Swedish municipality. Autism Vol 11(5) 453–463  
10

11 38. Cassidy A, McConkey R, Truesdale-Kennedy M and Slevin E Preschoolers with autism  
12 spectrum disorders: the impact on families and the supports available to them. Early Child  
13 Development and Care Vol 178(2),115–128  
14

15  
16 39. Solomon O, 2010 What a dog can do: children with autism and therapy dogs in social  
17 interaction. Journal of the society for psychological anthropology. 38: 1 143-166.  
18

19  
20 40. Sanders C R (2004). Excusing tactics: social responses to the public misbehaviour of  
21 companion animals. Anthrozoos, 4, 82-90.  
22  
23  
24  
25  
26  
27  
28  
29  
30  
31  
32  
33  
34  
35  
36  
37  
38  
39  
40  
41  
42  
43  
44  
45  
46  
47  
48  
49  
50  
51  
52  
53  
54  
55  
56  
57  
58  
59  
60

Table 1 Questionnaire subsections, details and measures.

| Section                                   | Details                                                                                                                                                                                                                                                                                                                                                                           | Measure                                                                                                                |
|-------------------------------------------|-----------------------------------------------------------------------------------------------------------------------------------------------------------------------------------------------------------------------------------------------------------------------------------------------------------------------------------------------------------------------------------|------------------------------------------------------------------------------------------------------------------------|
| <b>Part 1. Demographics</b>               | <ol style="list-style-type: none"> <li>Gender, age, other medical conditions, age of diagnosis, home location.</li> <li>Education, learning level, verbal/non verbal Interventions and therapies received</li> </ol>                                                                                                                                                              | Tick boxes, yes/no options, free text.                                                                                 |
| <b>Part 2. Parenting &amp; Autism</b>     | <ol style="list-style-type: none"> <li>Perceived competence<br/>From: Self Determination Theory<br/><i>Deci &amp; Ryan (1985 &amp; 2000)</i></li> <li>Caregiver strain questionnaire<br/>From: <i>Brannan et al (1997) &amp; Khanna et al., (2011)</i><br/><i>Objective strain</i><br/><i>Subjective internalised strain</i><br/><i>Subjective externalised strain</i></li> </ol> | <p>Four items on a 7-point scale</p> <p>21 items on a 5 point scale.</p> <p>11 items</p> <p>6 items</p> <p>4 items</p> |
| <b>Part 3. Environment &amp; Public</b>   | <ol style="list-style-type: none"> <li>Environment safety and security<br/>Adapted from scale structures:<br/><i>Rosenberg et al., (2009)</i></li> <li>Public Perception</li> </ol>                                                                                                                                                                                               | <p>Eight items on a 7-point scale.</p> <p>Four items on a 7-point scale.</p>                                           |
| <b>Part 4. Benefits &amp; constraints</b> | <ol style="list-style-type: none"> <li>Benefits of having an assistance dog</li> <li>Constraints of having an assistance dog</li> </ol>                                                                                                                                                                                                                                           | Free text.                                                                                                             |

1  
2  
3  
4  
5  
6  
7  
8  
9  
10  
11  
12  
13  
14  
15  
16  
17  
18  
19  
20  
21  
22  
23  
24  
25  
26  
27  
28  
29  
30  
31  
32  
33  
34  
35  
36  
37  
38  
39  
40  
41  
42  
43  
44  
45  
46  
47  
48  
49

For peer review only

Table 2 Participant Characteristics (With Dog n=80, Waiting list for Dog n=84)

| <i>Characteristics</i>  |                         | <i>With Dog<br/>N (%)</i> | <i>Waiting for Dog<br/>N (%)</i> | <i>P-value</i> |
|-------------------------|-------------------------|---------------------------|----------------------------------|----------------|
| <b>Gender</b>           | Male                    | 70 (87.5)                 | 77 (91.7)                        | –              |
| <b>Age</b>              | 0-6 years               | 30 (37.5)                 | 60 (71.4)                        | <0.001         |
|                         | 7-9 years               | 50 (62.5)                 | 24 (28.6)                        |                |
| <b>Location</b>         | Town/city centre        | 11 (13.8)                 | 8 (9.0)                          | 0.217          |
|                         | Suburb                  | 33 (41.3)                 | 47 (57.0)                        |                |
|                         | Countryside             | 36 (45.0)                 | 28 (34.0)                        |                |
| <b>Other conditions</b> | Yes                     | 24 (30.0)                 | 27 (32.1)                        | 0.767          |
| <b>Verbal</b>           | Yes                     | 42 (52.5)                 | 35 (42.0)                        | 0.165          |
| <b>Education</b>        | Preschool               | 0                         | 10 (11.9)                        | –              |
|                         | Home tuition            | 1 (1.0)                   | 4 (5.0)                          | –              |
|                         | Primary                 | 13 (16.3)                 | 11 (31.1)                        | 0.025          |
|                         | Special class (Primary) | 17 (21.3)                 | 29 (34.5)                        |                |
|                         | Special school (ASD)    | 49 (61.3)                 | 30 (35.7)                        |                |
| <b>Interventions</b>    | Speech and Language     | 38 (47.5)                 | 32 (38.1)                        | 0.224          |
|                         | Occupational Therapy    | 37 (46.3)                 | 32 (38.1)                        | 0.290          |
|                         | Resource Teacher        | 20 (25.0)                 | 22 (26.2)                        | 0.861          |
|                         | Special Needs Assistant | 64 (80.0)                 | 57 (67.9)                        | 0.077          |

P-values are from valid chi-square tests.

‘–’ Not included in chi-square analysis as numbers do not meet minimum expected count.

Table 3. Summary of results from Environmental Hazards, Public Awareness, Competence and Caregiver Strain scales.

| Item   | Description                                 | Mean (95%CI)         |                      | Diff* (95% CI)      | P-value             |
|--------|---------------------------------------------|----------------------|----------------------|---------------------|---------------------|
|        |                                             | With Dog (n=80)      | Waiting Dog (n=84)   |                     |                     |
| HAZ    | Environmental Hazards (range 8 -56)         | 32.43 (29.47: 35.39) | 22.97 (20.83: 25.11) | 10.9 (6.97, 14.89)  | <0.001 <sup>1</sup> |
| PUBLIC | Public Acceptance(range 4 –28)              | 15.87 (14.23: 17.50) | 10.67 (9.56:11.77)   | 5.80 (3.69, 7.90)   | <0.001 <sup>2</sup> |
| SD     | Competence (range 4 – 28)                   | 19.75 (18.74:20.77)  | 17.91 (16.52: 18.92) | 1.97 (0.273, 3.68)  | 0.023               |
| OS     | Objective strain (range 11-55)              | 35.03 (32.81: 37.20) | 35.91 (34.08:38.01)  | -0.54 (-3.78, 2.70) | 0.744               |
| SIS    | Subjective Internalised strain (range 6-35) | 22.47 (21.21:23.60)  | 23.63 (22.89:25.03)  | -0.81 (-2.63, 1.00) | 0.380               |
| SES    | Subjective Externalised strain (range 4-20) | 7.74 (7.01: 8.46)    | 7.88 (7.28:8.49)     | -0.34 (-1.37, .69)  | 0.522               |

\*Adjusted for gender, age, location, education

1. There was a lesser albeit significant effect of having a dog for parents/guardians whose children attend a special school for children with ASD
2. There is no significant difference in ratings of parents/guardians who have a child in a main stream primary school (p=0.09)

1  
2  
3  
4  
5  
6  
7  
8  
9  
10  
11  
12  
13  
14  
15  
16  
17  
18  
19  
20  
21  
22  
23  
24  
25  
26  
27  
28  
29  
30  
31  
32  
33  
34  
35  
36  
37  
38  
39  
40  
41  
42  
43  
44  
45  
46  
47  
48  
49

Figure 1 – Parents/Guardians perceived benefits of having an assistance dog (themes and categories)

99% of parents/guardians with a dog listed at least two benefits.  
99% of parents/guardians on the wait list for a dog listed at least two benefits.  
Category 'Physiological' refers to how assistance dogs can facilitate a child with respect to mobility and ambulation.  
Category 'Management' refers to how assistance dogs can facilitate day to day management of their child.

Peer review only

1  
2  
3  
4  
5  
6  
7 Figure 2 – Parents/Guardians perceived constraints of having assistance dog (themes and categories)  
8

9 66% of parents/guardians with a dog listed at least two constraints.

10 64% of parents/guardians on the wait list for a dog listed at least two constraints.

11 \*Please note that one category 'other' from the waiting list group second constraint is not included in the figure.

12 Category 'Dogs life' refers to concerns about what happens when an assistance dog retires/dies.

13 Category 'Acceptance' refers to challenges around family and children's acceptance of an assistance dog.  
14  
15  
16  
17  
18  
19  
20  
21  
22  
23  
24  
25  
26  
27  
28  
29  
30  
31  
32  
33  
34  
35  
36  
37  
38  
39  
40  
41  
42  
43  
44  
45  
46  
47  
48  
49

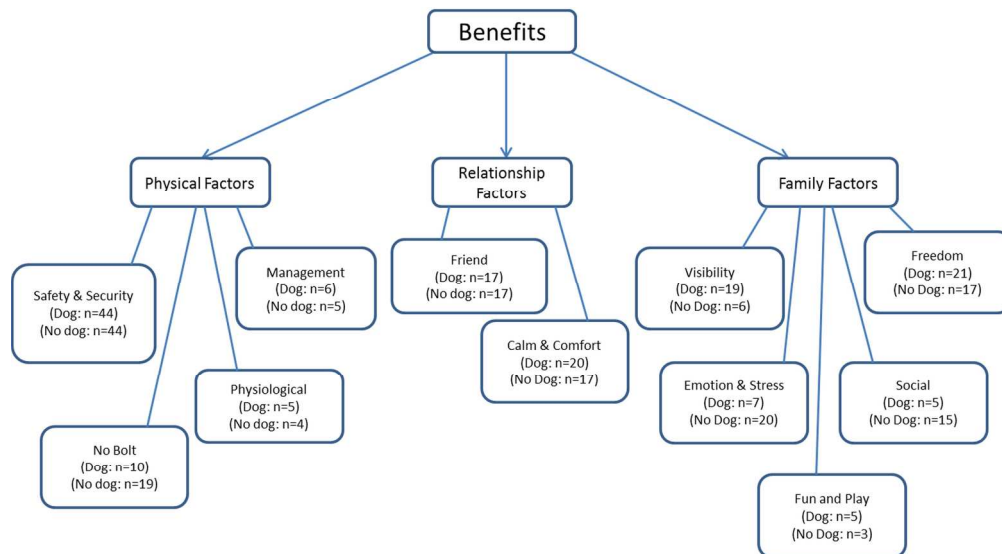

Figure 1 – Parents/Guardians perceived benefits of having an assistance dog (themes and categories)

99% of parents/guardians with a dog listed at least two benefits.

99% of parents/guardians on the wait list for a dog listed at least two benefits.

Category 'Physiological' refers to how assistance dogs can facilitate a child with respect to mobility and ambulation.

Category 'Management' refers to how assistance dogs can facilitate day to day management of their child.

163x90mm (300 x 300 DPI)



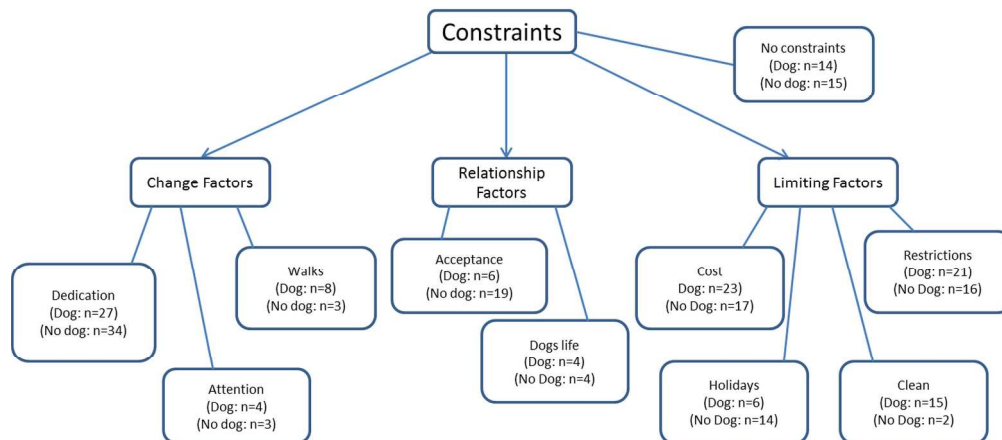

Figure 2 – Parents/Guardians perceived constraints of having assistance dog (themes and categories)

66% of parents/guardians with a dog listed at least two constraints.

64% of parents/guardians on the wait list for a dog listed at least two constraints.

\*Please note that one category 'other' from the waiting list group second constraint is not included in the figure.

Category 'Dogs life' refers to concerns about what happens when an assistance dog retires/dies. Category 'Acceptance' refers to challenges around family and children's acceptance of an assistance dog.

205x90mm (300 x 300 DPI)

Review only

## Supplementary Tables

**Table 1. Environment Safety and Security.** Instructions given to Participants. Please rate how strongly you agree or disagree with the statements below. These statements are focused on how you feel about your child's safety and security in particular public areas over the past 3 months. You can place an 'V' in the appropriate box to indicate your choice. *Environmental hazards include, traffic, dangerous materials, outdoor areas where a child could easily run away/get lost, inappropriate contact with others.*

## Percentage Scores on Individual Items for Environmental Hazards Scales (7-point scale from strongly disagree to strongly agree)

| Item                                                                                                           | %                     | 1            | 2            | 3            | 4            | 5            | 6            | 7            |
|----------------------------------------------------------------------------------------------------------------|-----------------------|--------------|--------------|--------------|--------------|--------------|--------------|--------------|
| 1 I am confident that my child with autism is secure from environmental hazards when we <u>go on walks</u>     | With Dog<br>Wait List | 22.5<br>48.8 | 12.5<br>23.8 | 6.3<br>8.3   | 5.0<br>9.5   | 16.3<br>3.6  | 20.0<br>4.8  | 17.5<br>1.2  |
| 2 I am sure that my child with autism is secure from environmental hazards when we <u>visit a park</u>         | With Dog<br>Wait List | 18.8<br>29.8 | 15.0<br>31.0 | 10.0<br>15.5 | 12.5<br>10.7 | 15.0<br>4.8  | 18.8<br>6.0  | 10.0<br>2.4  |
| 3 I am certain that my child with autism is secure from environmental hazards when we <u>visit friends</u>     | With Dog<br>Wait List | 22.5<br>19.0 | 12.5<br>23.8 | 20.0<br>27.4 | 13.8<br>6.0  | 8.8<br>10.7  | 10.0<br>9.5  | 12.5<br>3.6  |
| 4 I am confident that my child with autism is secure from environmental hazards when we <u>travel in a car</u> | With Dog<br>Wait List | 6.3<br>11.9  | 7.5<br>13.1  | 16.3<br>19.0 | 7.5<br>10.7  | 20.0<br>11.9 | 22.5<br>17.9 | 20.0<br>15.5 |
| 5 I am convinced that my child with autism is safe from environmental hazards <u>in our home</u>               | With Dog<br>Wait List | 2.5<br>4.8   | 6.3<br>9.5   | 7.5<br>16.7  | 6.3<br>13.1  | 11.3<br>25.9 | 40<br>15.5   | 26.3<br>15.5 |
| 6 I am sure that my child with autism is safe from environmental hazards <u>in a shopping centre</u>           | With Dog<br>Wait List | 25.6<br>46.4 | 11.5<br>25.0 | 12.8<br>10.7 | 12.8<br>6.0  | 17.9<br>8.3  | 9.0<br>2.4   | 10.3<br>1.2  |
| 7 I am confident that my child with autism is safe from environmental hazards <u>in a restaurant</u>           | With Dog<br>Wait List | 21.8<br>38.1 | 17.9<br>22.6 | 11.5<br>17.9 | 9.0<br>10.7  | 16.7<br>8.3  | 14.1<br>2.4  | 9.0<br>0     |
| 8 In general I <u>feel calm</u> that my child with autism is safe from environmental hazards                   | With Dog<br>Wait List | 19.2<br>46.4 | 16.7<br>21.4 | 12.8<br>15.5 | 12.8<br>3.6  | 10.3<br>2.4  | 15.4<br>8.3  | 12.8<br>2.4  |

**Table 2. Public Perception.** Instructions given to Participants. These statements are focused on how you rate the public's perception of your child over the past 3 months. Please note: To 'make allowances' means that people react responsibly and respectfully towards you and your child when you are out in public.

**Percentage Scores on Individual Items for Public Perception Scales (7-point scale from strongly disagree to strongly agree)**

| Item                                                                                                          | %                     | 1            | 2            | 3            | 4            | 5            | 6           | 7           |
|---------------------------------------------------------------------------------------------------------------|-----------------------|--------------|--------------|--------------|--------------|--------------|-------------|-------------|
| 1 I feel confident that people make allowances for my child with autism when we are <u>in a shopping area</u> | With Dog<br>Wait List | 10.3<br>26.5 | 14.1<br>28.9 | 16.7<br>18.1 | 17.9<br>15.7 | 10.3<br>8.4  | 15.4<br>2.4 | 15.4<br>0   |
| 2 I am sure that people make allowances for my child with autism when we are <u>in a restaurant</u>           | With Dog<br>Wait List | 12.8<br>38.1 | 19.2<br>29.8 | 17.9<br>10.7 | 17.9<br>11.9 | 5.1<br>6.0   | 14.1<br>3.6 | 12.8<br>0   |
| 3 I am certain that people make allowances for my child with autism when we are <u>in a park</u>              | With Dog<br>Wait List | 17.9<br>20.2 | 9.0<br>21.4  | 20.5<br>26.2 | 17.9<br>10.7 | 12.8<br>11.9 | 11.5<br>6.0 | 10.3<br>3.6 |
| 4 I am sure that people make allowances for my child with autism when we are <u>out walking</u>               | With Dog<br>Wait List | 10.0<br>19.3 | 11.3<br>28.9 | 13.8<br>14.5 | 17.5<br>19.3 | 15.0<br>8.4  | 17.5<br>8.4 | 15.0<br>1.2 |

1  
2  
3  
4  
5  
6  
7  
8  
9  
10  
11  
12  
13  
14  
15  
16  
17  
18  
19  
20  
21  
22  
23  
24  
25  
26  
27  
28  
29  
30  
31  
32  
33  
34  
35  
36  
37  
38  
39  
40  
41  
42  
43  
44  
45  
46  
47  
48  
49

**Table 3. Perceived Competence. Instructions given to participants.** Please respond to each of the following items in terms of how true they are for you with respect to being a parent of a child with autism. You can circle the number which represents how true you feel each statement is.

**Percentage Scores on Individual Items for Perceived Competence Scales (7-point scale from 'not at all true' to 'very true')**

| Item                                                                        |           | 1   | 2    | 3    | 4    | 5    | 6    | 7    |
|-----------------------------------------------------------------------------|-----------|-----|------|------|------|------|------|------|
| 1 I feel confident in my abilities to manage my child with autism           | With Dog  | 1.3 | 2.5  | 6.3  | 18.8 | 35.0 | 27.5 | 8.8  |
|                                                                             | Wait List | 1.2 | 7.1  | 16.7 | 26.2 | 26.2 | 14.3 | 8.3  |
| 2 I am capable of dealing with my child with autism                         | With Dog  | 1.3 | 2.5  | 5.0  | 15.0 | 25.0 | 38.8 | 12.5 |
|                                                                             | Wait List | 1.2 | 4.8  | 14.3 | 22.6 | 28.6 | 17.9 | 10.7 |
| 3 I am able to do my own routine caring for my child with autism            | With Dog  | 2.5 | 7.5  | 10.0 | 23.8 | 18.8 | 27.5 | 10.0 |
|                                                                             | Wait List | 8.3 | 10.7 | 13.1 | 21.4 | 20.2 | 11.9 | 14.3 |
| 4 I am able to meet the challenges of being a parent of a child with autism | With Dog  | 2.5 | 3.8  | 11.3 | 17.5 | 31.3 | 30.0 | 3.8  |
|                                                                             | Wait List | 6.0 | 4.8  | 21.4 | 10.7 | 26.2 | 20.2 | 10.7 |

STROBE Statement—parents perspectives on the value of assistance dogs for children with autism spectrum disorder: a cross sectional study.

|                              | Item No | Recommendation                                                                                                                                                                                                                                                                                                                                                                                                                                                        |
|------------------------------|---------|-----------------------------------------------------------------------------------------------------------------------------------------------------------------------------------------------------------------------------------------------------------------------------------------------------------------------------------------------------------------------------------------------------------------------------------------------------------------------|
| <b>Title and abstract</b>    | 1       | (a) We have indicated the study's design with a commonly used term in the title<br>(b) We have provided in the abstract an informative and balanced summary of what was done and what was found                                                                                                                                                                                                                                                                       |
| <b>Introduction</b>          |         |                                                                                                                                                                                                                                                                                                                                                                                                                                                                       |
| Background/rationale         | 2       | We have explained the scientific background and rationale for the investigation being reported                                                                                                                                                                                                                                                                                                                                                                        |
| Objectives                   | 3       | Specific objectives, including any prespecified hypotheses are stated at end of the introduction                                                                                                                                                                                                                                                                                                                                                                      |
| <b>Methods</b>               |         |                                                                                                                                                                                                                                                                                                                                                                                                                                                                       |
| Study design                 | 4       | We have presented key elements of study design early in the paper – details given in Methods section and at end of Introduction.                                                                                                                                                                                                                                                                                                                                      |
| Setting                      | 5       | We have described the setting, locations, and relevant dates, including periods of recruitment, exposure, follow-up, and data collection                                                                                                                                                                                                                                                                                                                              |
| Participants                 | 6       | <i>Cross-sectional study</i> —We have given the eligibility criteria, and the sources and methods of selection of participants                                                                                                                                                                                                                                                                                                                                        |
| Variables                    | 7       | We have clearly defined all outcomes, exposures, predictors, potential confounders, and effect modifiers.                                                                                                                                                                                                                                                                                                                                                             |
| Data sources/<br>measurement | 8*      | We have provided full descriptions of our measures and assessments in the methods section                                                                                                                                                                                                                                                                                                                                                                             |
| Bias                         | 9       | We have addressed biases in our procedures section and in our regression analysis - adjusting for key demographic variables.                                                                                                                                                                                                                                                                                                                                          |
| Study size                   | 10      | We sampled the total population of users of a national assistance dog's organisation. Explained in Methods section.                                                                                                                                                                                                                                                                                                                                                   |
| Quantitative variables       | 11      | Data management techniques are described in the data analysis section at end of the Methods.                                                                                                                                                                                                                                                                                                                                                                          |
| Statistical methods          | 12      | (a) We have described all statistical methods, including those used to control for confounding – in the Methods section.<br>(b) We have described methods used to examine subgroups and interactions in the Results section.<br>(c) We had minimal missing data.<br><i>Cross-sectional study</i> —we used data analysis techniques appropriate for comparing two independent groups.<br>(e) Describe any sensitivity analyses – we did not do a sensitivity analysis. |

Continued on next page

**Results**

|                  |     |                                                                                                                                                                                                                                                                                                                                                                                                                                                                                      |
|------------------|-----|--------------------------------------------------------------------------------------------------------------------------------------------------------------------------------------------------------------------------------------------------------------------------------------------------------------------------------------------------------------------------------------------------------------------------------------------------------------------------------------|
| Participants     | 13* | (a) We have reported numbers of individuals in our cross sectional study—eg numbers potentially eligible, examined for eligibility, confirmed eligible, included in the study, and analysed<br>(b) We omitted the over tens from our analysis for this study – described in Results section.<br>(c) We have the maximum of 5 tables and figures included – these were considered essential and so we do not have space for a flow diagram. We are happy to provide one if requested. |
| Descriptive data | 14* | (a) We have given characteristics of the study participants (eg demographic, clinical, social) and information on exposures and potential confounders (start of Results section)<br>(b) We had minimal missing data.                                                                                                                                                                                                                                                                 |
| Outcome data     | 15* | <i>Cross-sectional study</i> —We have reported the numbers of outcome events or summary measures in the Results section.                                                                                                                                                                                                                                                                                                                                                             |
| Main results     | 16  | (a) We have given unadjusted and adjusted means and 95% confidence intervals. We have explained the reasons for adjustment in the results section.<br>(b) We did not categorise continuous variables.<br>(c) If relevant, consider translating estimates of relative risk into absolute risk for a meaningful time period – this was not relevant.                                                                                                                                   |
| Other analyses   | 17  | Report other analyses done—eg analyses of subgroups and interactions – main interactions are reported in the Results section and in the Discussion.                                                                                                                                                                                                                                                                                                                                  |

**Discussion**

|                  |    |                                                                                                                                                                                     |
|------------------|----|-------------------------------------------------------------------------------------------------------------------------------------------------------------------------------------|
| Key results      | 18 | We have summarised key results with reference to study objectives                                                                                                                   |
| Limitations      | 19 | We have discussed limitations of the study, taking into account sources of potential bias or imprecision.                                                                           |
| Interpretation   | 20 | We have given a cautious overall interpretation of results considering objectives, limitations, multiplicity of analyses, results from similar studies, and other relevant evidence |
| Generalisability | 21 | We have discussed the generalisability (external validity) of the study results at the end of the Discussion.                                                                       |

**Other information**

|         |    |                                                                                                                                                                                                                                                                                                                 |
|---------|----|-----------------------------------------------------------------------------------------------------------------------------------------------------------------------------------------------------------------------------------------------------------------------------------------------------------------|
| Funding | 22 | This study was not funded from any particular source. It was done at University College Cork and by kind permission of the Irish Guide Dogs for the Blind. They assisted us in contacting their service users. We did not have access to their service users lists. They did not have access to the study data. |
|---------|----|-----------------------------------------------------------------------------------------------------------------------------------------------------------------------------------------------------------------------------------------------------------------------------------------------------------------|

\*Give information separately for cases and controls in case-control studies and, if applicable, for exposed and unexposed groups in cohort and cross-sectional studies.

**Note:** An Explanation and Elaboration article discusses each checklist item and gives methodological background and published examples of transparent reporting. The STROBE checklist is best used in conjunction with this article (freely available on the Web sites of PLoS Medicine at <http://www.plosmedicine.org/>, Annals of Internal Medicine at <http://www.annals.org/>, and Epidemiology at <http://www.epidem.com/>). Information on the STROBE Initiative is available at [www.strobe-statement.org](http://www.strobe-statement.org).
